# Supplementary material
Source: PubMed Central journal article supplement (PMC5972039)
Supplement: NIHMS965204-supplement-SI.pdf [file NIHMS965204-supplement-SI.pdf]

In the format provided by the authors and unedited.

# Bifluoride-catalysed sulfur(vi) fluoride exchange reaction for the synthesis of polysulfates and polysulfonates

Bing Gao<sup>1</sup>, Linda Zhang<sup>2</sup>, Qinheng Zheng<sup>1</sup>, Feng Zhou<sup>3</sup>, Liana M. Klivansky<sup>4</sup>, Jianmei Lu<sup>3</sup>, Yi Liu<sup>4</sup>, JiaJia Dong<sup>5\*</sup>, Peng Wu<sup>2\*</sup> and K. Barry Sharpless<sup>1,5\*</sup>

<sup>1</sup>Department of Chemistry, The Scripps Research Institute, 10550 North Torrey Pines Road, La Jolla, CA 92037, USA.

<sup>2</sup>Department of Molecular Medicine, The Scripps Research Institute, 10550 North Torrey Pines Road, La Jolla, CA 92037, USA.

<sup>3</sup>College of Chemistry, Chemical Engineering and Materials Science, Collaborative Innovation Center of Suzhou, Nano Science and Technology, Soochow University, Suzhou 215123, China.

<sup>4</sup>The Molecular Foundry, Lawrence Berkeley National Laboratory, Berkeley, California 94720, USA.

<sup>5</sup>Key Laboratory of Organofluorine Chemistry, Shanghai Institute of Organic Chemistry, Chinese Academy of Sciences, 345 Ling-Ling Road, Shanghai 200032, China.

## Table of Contents

|                                                                                                  |            |
|--------------------------------------------------------------------------------------------------|------------|
| <b>1, Materials and Instrumentation .....</b>                                                    | <b>3</b>   |
| <b>2, Experimental Section .....</b>                                                             | <b>4</b>   |
| 2-1, General procedure for the preparation of monomers .....                                     | 4          |
| 2-2, General procedure for the synthesis of polysulfates and polysulfonates.....                 | 7          |
| 2-3, The preparation of bifluoride and poly(hydrogen fluoride) catalysts.....                    | 9          |
| 2-4, Catalyst evaluation .....                                                                   | 13         |
| 2-5, The effect of reaction temperature on the polycondensation of A-1 and B-1 .....             | 17         |
| 2-6, The effect of mono-functional chain terminators on the molecular weight of polysulfate..... | 21         |
| 2-7, Post-polymerization modification of polysulfates .....                                      | 23         |
| 2-8, 100-gram scale synthesis of polysulfate P-1 catalyzed by Q-5 .....                          | 24         |
| 2-9, The preparation of monomer A-1 from bisphenol-A and TBSF .....                              | 27         |
| <b>3, Analytical Section .....</b>                                                               | <b>28</b>  |
| 3-1, Spectroscopic data of catalysts .....                                                       | 28         |
| 3-2, Spectroscopic data of monomers.....                                                         | 30         |
| 3-3, Spectroscopic data of polymers .....                                                        | 38         |
| 3-4, Copies of the NMR spectra of new compounds.....                                             | 44         |
| 3-5, Copies of X-ray Crystallographic Analysis .....                                             | 91         |
| <b>4, References.....</b>                                                                        | <b>109</b> |

## 1, Materials and Instrumentation

All commercial chemicals were used as received unless otherwise noted. Extra dry solvents over molecular sieves were purchased from Acros Organics, including acetonitrile (CH<sub>3</sub>CN), tetrahydrofuran (THF), dimethylformamide (DMF), and *N*-methyl-2-pyrrolidone (NMP). Merck F-254 silica gel plates were used for thin layer analytical chromatography (TLC). Column chromatography purification was carried out using EMD (Merck) Silica Gel 60 (40-63  $\mu$ m).

<sup>1</sup>H, <sup>13</sup>C, <sup>19</sup>F, and <sup>31</sup>P NMR spectra were recorded on Bruker DRX-500, AMX-400, or Varian Inova-400 at 295 K. Chemical shifts ( $\delta$ ) were quoted in parts per million (ppm), and referenced to the appropriate NMR solvent residual peaks. Melting points were recorded on a Barnstead Electrothermal 9300 digital capillary melting point apparatus. GC-MS data were recorded on an Agilent 7890A GC system with an Agilent 5975C Inert MSD system operating in electron impact ionization (EI) mode. The single crystal X-ray diffraction results were obtained at the *UCSD Crystallography Lab* on a Bruker Kappa APEX-II Ultra CCD diffractometer equipped with Mo K $\alpha$  radiation ( $\lambda = 0.71073$ ). Elemental analysis data were collected at *Shanghai Institute of Organic Chemistry, Chinese Academy of China, Shanghai, China*.

The polymer molecular weight (number-average,  $M_n^{PS}$ ) and polydispersity (PDI) relative to polystyrene were measured by Waters 1515 Gel Permeation Chromatography (GPC) system. It was equipped with a diode-array, a refractive index detector 2414, and a series of MZ-Gel *SDplus* 500  $\text{\AA}$ , 10E3  $\text{\AA}$ , 10E4  $\text{\AA}$  columns. The system was calibrated with *EasyVial PS-M* polystyrene standards (*Agilent Technologies*,  $M_p = 364000, 217900, 113300, 47190, 30230, 13270, 6940, 2780, 1220, 935, 370, 162$  g/mol). HPLC grade DMF was used as mobile phase with 0.05 mol/L of LiBr as additives (*Acros Organics*, 99.999% grade). The elution rate was 0.8 mL/min (column temperature, 40  $^{\circ}$ C). All samples/standards were tested at 100  $\mu$ L loadings (1.0 g/mL).

The thermal gravimetric analysis (TGA) and differential scanning calorimetry (DSC) analysis were carried out at *Lawrence Berkeley National Laboratory* with the assistance of Liana M. Klivansky and Dr. Yi Liu, and at *Soochow university* with the assistance of Feng Zhou, Bin Xu, Dr. Qing-Feng Xu and Jian-Mei Lu. TGA were carried out on TGA-MS Q5000 under nitrogen using aluminum pans (20  $^{\circ}$ C/min started from 25  $^{\circ}$ C and ended at 600  $^{\circ}$ C). The DSC were carried out on TA Q200 with a heat rate of 5  $^{\circ}$ C/min.

The ion-exchange experiment with anhydrous HF was carried out at Dr. Philip Dawson's Lab, *The Scripps Research Institute, La Jolla Campus, CA, USA*.

## 2, Experimental Section

### 2-1, General procedure for the preparation of monomers

#### 2-1-1, The preparation of monomer A from bisphenols.<sup>1</sup> (take A-1 as an example).

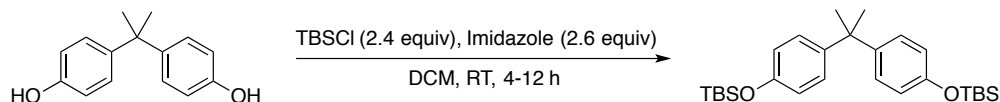

In a 500 mL round-bottom flask equipped with a stir bar, bisphenol-A (20 mmol) and imidazole (52 mmol) were combined and dissolved in 100 mL of chloromethane ( $\text{CH}_2\text{Cl}_2$ ). The solution was stirred at room temperature for 10 mins, then was added 20 mL  $\text{CH}_2\text{Cl}_2$  solution of TBSCl (48 mmol) dropwise within 20 mins. The resulting mixture was stirred at room temperature until the full conversion of starting compound to target product, monitored by TLC and LC-MS. Precipitates were removed by filtration. The filtrate was concentrated on rotary evaporator. The resulting crude product was dissolved in 100 mL of ethyl acetate (EtOAc), which was subsequently washed with 50 mL saturated aqueous solution of  $\text{NaHCO}_3$  (3 times) and 50 mL saturated aqueous solution of  $\text{NaCl}$ . The organic phase was dried over anhydrous  $\text{Na}_2\text{SO}_4$ . After filtration, the filtrate was subjected to evaporation to remove EtOAc. The resulting crude product was heated to 70 °C *in vacuo* (2.0 torr) until TBS-O-TBS was completely removed, giving pure product as white solid at room temperature.

*(Note: The silylation reaction is near quantitative. No further purifications are required for most products. In case flash column chromatography purification was needed, the column packed with silica gel should be pre-washed with 10% (v/v) of  $\text{Et}_3\text{N}$  in Hexane. Because some TBS ethers of phenol might be sensitive to the weak acidity nature of the silica gel, which causes the decomposition of TBS-OAr back to phenol. Hexane and ethyl acetate are used as eluent.)*

#### 2-1-2, The preparation of monomer B from bisphenols.<sup>1</sup> (take B-1 as an example)

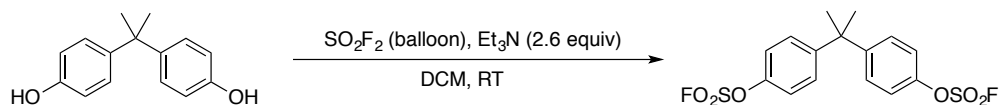

In a 500 mL round-bottom flask equipped with a stir bar, bisphenol-A (20 mmol) was dissolved in 100 mL dichloromethane ( $\text{CH}_2\text{Cl}_2$ ). Triethylamine (52 mmol) was added and the resulting solution was stirred at room temperature for 10 mins. The flask was charged with gentle vacuum, then quickly filled with  $\text{SO}_2\text{F}_2$  gas via a syringe attached balloon. The reaction was allowed stirring at room temperature until the full conversion of starting compound to target bisfluorosulfate, monitored by TLC and LC-MS.  $\text{CH}_2\text{Cl}_2$  was then evaporated away on rotary evaporator, the resulting crude product was dissolved in 100 mL ethyl acetate (EtOAc). It was subsequently washed with 50 mL aqueous  $\text{HCl}$  (1.0 M, 3 times), 50 mL saturated aqueous solution of  $\text{NaHCO}_3$ , then 50 mL saturated brine. The organic phase was dried over anhydrous  $\text{Na}_2\text{SO}_4$ . After filtration,



the removal of EtOAc gave bisfluorosulfate as white solid, which was further crystallized from Hexane/EtOAc, giving colorless crystalline.

(Note: For more demanding substrates, acetonitrile was used as solvent and 2.6 equivalent of *N,N*-diisopropylethylamine was used as base.)

### 2-1-3, The preparation of AB type monomers from bisphenols. (take AB-1 as an example)

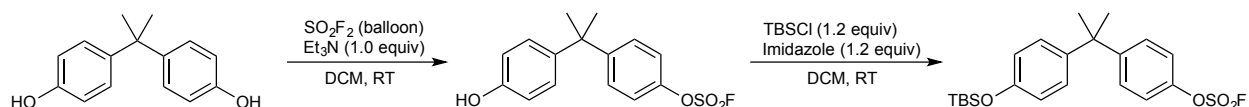

*Step 1*, In a 1.0 L round-bottom flask equipped with a stir bar, bisphenol-A (45.6 g, 0.2 mol) was dissolved in 400 mL  $\text{CH}_2\text{Cl}_2$ . Triethylamine (0.21 g, 0.2 mol) was added, and the solution was stirred at room temperature for 10 mins. The flask was charged with gentle vacuum, then quickly filled with  $\text{SO}_2\text{F}_2$  gas via a syringe attached balloon. The reaction mixture was allowed stirring at room temperature for 4 hours. Then  $\text{CH}_2\text{Cl}_2$  was evaporated away, and the crude product was dissolved in 200 mL EtOAc, which was subsequently washed with 100 mL aqueous HCl (1.0 M, 3 times), 50 mL saturated aqueous solution of  $\text{NaHCO}_3$ , and 50 mL of saturated brine. The organic phase was concentrated and subjected to flash column chromatography purification (Hexane/EtOAc). The bisfluorosulfate product **B-1** was eluted out first (37g, 24% yield), followed by the mono-functionalized adduct (14 g, 23% yield). The unconverted starting compounds was recovered at last (23 g, 51% recovery).

*Step 2*, In a 500 mL round-bottom flask equipped with a stir bar, mono-functionalized intermediate (13 g, 42 mmol) and TBSCl (7.6 g, 50.4 mmol) were combined and dissolved in 100 mL  $\text{CH}_2\text{Cl}_2$ . Imidazole (3.4 g, 50.4 mmol) was slowly added under vigorous stirring. The resulting mixture was further stirred at room temperature for another 2 hours. The precipitates were removed by filtration; the filtrate was then concentrated. The resulting crude product was dissolved in 100 mL EtOAc, which was washed with 50 mL saturated aqueous solution of  $\text{NaHCO}_3$  (3 times) and 50 mL saturated brine. The organic solution was concentrated, then subjected to flash column chromatography purification (silica gel pre-washed with 10% (v/v) of  $\text{Et}_3\text{N}$  in Hexane; Hexane/EtOAc = 10:1 as eluent). **AB-1** was obtained as colorless oil, 15.2 g (86% yield).

### 2-1-4, The preparation of aromatic bis(sulfonyl fluoride).<sup>1</sup>

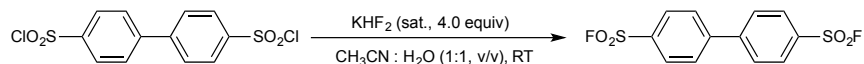

*Aromatic bis(sulfonyl fluoride) was prepared from aromatic bis(sulfonyl chloride) according to the protocol reported in reference [1].*

### 2-1-5, The preparation of aliphatic bis(sulfonyl fluoride).<sup>2,3</sup>

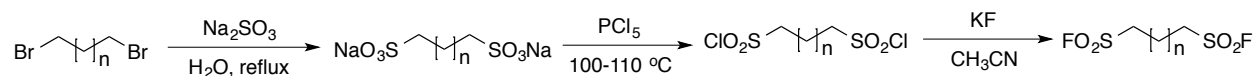

*Step 1*, To the aqueous solution of sodium sulfite ( $\text{Na}_2\text{SO}_3$ , 126 g, 1.0 mol, in 300 mL distilled water), bis(alkyl bromide) (0.5 mol) was added. The reaction was refluxed until the organic phase was completely consumed. The resulting mixture was cooled to room temperature, white precipitates crashed out gradually. The precipitates were collected by filtration and dried at  $120\text{ }^\circ\text{C}$  for 4 hours to give dry bis(sodium alkyl sulfonate).

*Step 2*, In a 500 mL three-neck round-bottom flask equipped with a stir bar and a reflux condenser, 0.2 mol of dry bis(sodium alkyl sulfonate) and 0.44 mol of phosphorus pentachloride were combined under  $\text{N}_2$  atmosphere. The flask was heated to  $110\text{ }^\circ\text{C}$  for 2 hours, during which course the solid mixture gradually turn to suspension. It was allowed to react for another 2 hours, then cooled to room temperature. The mixture was slowly poured into ice water under vigorous stirring. Pale white solid crashed out which was collected via filtration, washed with distilled water, then dried *in vacuo* (2.0 torr). The crude product was used directly for the next step reaction without further purification.

*Step 3*, In a 250 mL round-bottom flask equipped with a stir bar and a reflux condenser, 50.0 mmol of aliphatic bis(sulfonyl chloride) and 110 mmol of potassium fluoride were combined in 30 mL  $\text{CH}_3\text{CN}$ . The mixture was refluxed at  $80\text{ }^\circ\text{C}$  until  $^1\text{H}$  NMR test indicated the reaction has achieved full conversion.  $\text{CH}_3\text{CN}$  was evaporated away. The resulting solid was partly soluble in 30 mL EtOAc (the insoluble slat was removed by filtration). The solution was concentrated for crystallization (Hexane/EtOAc). Pure aliphatic bis(sulfonyl fluoride) were obtained as white solid.

### 2-1-6, The perfluoroaliphatic bis(sulfonyl fluoride) was prepared following the reported procedure<sup>4</sup>

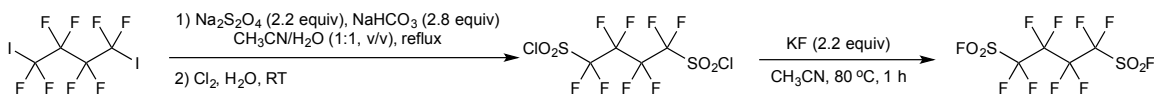

## 2-2, General procedure for the synthesis of polysulfates and polysulfonates

### 2-2-1, The polycondensation of monomers A and B (take P-1 as an example)

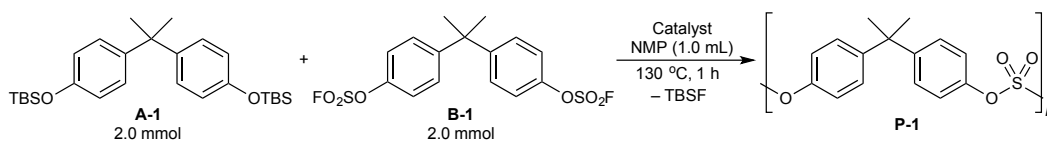

Monomers **A-1** (2.0 mmol) and **B-1** (2.0 mmol) were combined in a 10 mL oven-dried glass vial equipped with a Teflon-coated magnetic stir bar. The vial was screw-capped with a Teflon-coated rubber septum, purged with nitrogen (A N<sub>2</sub> balloon was attached to the vial through a syringe). Dry NMP (1.0 mL) was added, and the vial was placed into a pre-heated 130 °C oil bath. Catalyst tris(dimethylamino)sulfonium bifluoride (**Q-5**, 0.1 M in dry CH<sub>3</sub>CN, 40 μL) was added via micro-syringe under stirring. The reaction was run for 1 hour, during which course the reaction mixture turned highly viscous. 4 mL DMF was added at the end of the reaction to dissolve the crude polymer. The warm DMF solution was slowly poured into 100 mL of cold methanol under vigorous stirring. Polymers precipitated as white fiber or powder once the DMF solution touched the methanol. The polymer **P-1** was collected via filtration and were dried at 70 °C for 3 hours *in vacuo* (2.0 torr). Molecular weight and polymer distribution was determined on GPC.

(Note: when inorganic salts were used as catalyst, such as K<sup>+</sup>[FHF]<sup>-</sup>, they were combined with the **A**, **B** monomers before the reaction vial was heated to 130 °C.)

### 2-2-2, The polycondensation of AB type monomer (take the polycondensation of monomer AB-1 as an example).

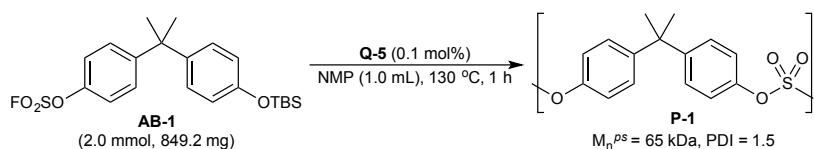

Monomers **AB-1** (849.2 mg, 2.0 mmol) were added to a 10 mL oven-dried glass vial equipped with a Teflon-coated magnetic stir bar. The vial was screw-capped with a Teflon-coated rubber septum, purged with nitrogen through a N<sub>2</sub> balloon attached via a syringe. Dry NMP (0.5 mL) was injected into the vial, then it was placed into a pre-heated 130 °C oil bath. With stirring, catalyst **Q-5** (0.1 M in CH<sub>3</sub>CN, 20 μL) was added via a micro-syringe. The reaction was maintained stirring for 1 hour. Thereafter, 2 mL DMF was added to dissolve the polymers at 130 °C. The resulting DMF solution was slowly poured into 50 mL methanol under vigorous stirring. Polymeric fiber precipitated once the warm DMF solution touch the cold methanol. The polymers were collected via filtration and dried at 70 °C for 3 hours *in vacuo* (2.0 torr). Molecular weight and distribution of resulting polymer **P-1** was determined on GPC.

**2-2-3, The polycondensation of bis(aryl silyl ether) with sulfonyl fluoride gas (SO<sub>2</sub>F<sub>2</sub>) (take the reaction between A-1 and SO<sub>2</sub>F<sub>2</sub> as an example).**

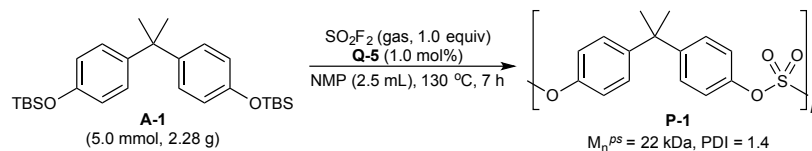

To a dry two-neck round-bottom flask (50 mL) equipped with a stir bar, was added monomer **A-1** (2.28 g, 5.0 mmol). One of the neck was attached to a balloon, the other was sealed with a rubber septum (Fig. 1a). Air in the flask was removed under vacuum and refilled with N<sub>2</sub> (make sure no/little N<sub>2</sub> reserve in the attached balloon). The flask was weighed on the balance before SO<sub>2</sub>F<sub>2</sub> gas was introduced, and was monitored until the net weight of SO<sub>2</sub>F<sub>2</sub> introduced from a cylinder reached 520 mg ( $\pm$  3 mg, 1.0 equiv). Dry NMP (2.5 mL) was subsequently injected into the flask via a syringe. The flask was carefully sealed to avoid leaking, and was placed into a pre-heated 130 °C oil bath with stirring. Catalyst **Q-5** (0.5 M in CH<sub>3</sub>CN, 100  $\mu$ L) was added via a micro-syringe. The reaction was allowed running for 7 hours. Thereafter, another 2.5 mL of DMF was added to dissolve the polymer at 130 °C. The resulting DMF solution was slowly poured into 50 mL of methanol under vigorous stirring. Polymers crashed out as white powder in methanol. They were collected via filtration and dried at 70 °C for 3 hours *in vacuo* (2.0 torr). Molecular weight and polydispersity were determined on GPC ( $M_n^{ps} = 22 \text{ kDa}$ , PDI = 1.4).

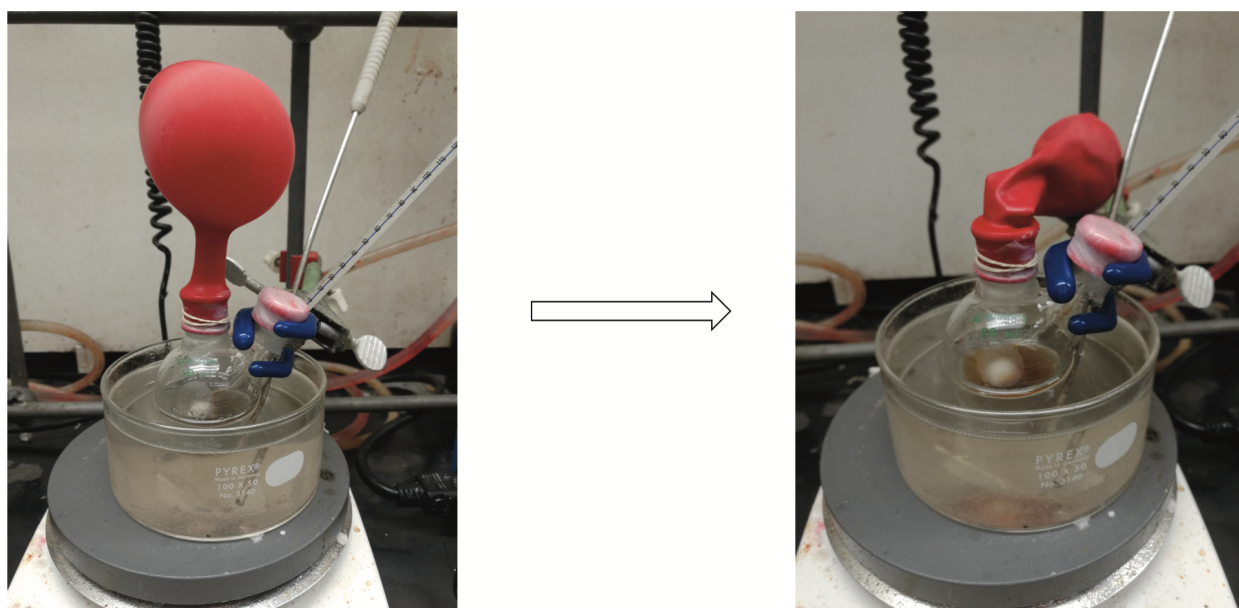

1<sup>#</sup>, at the beginning of the reaction

2<sup>#</sup>, at the end of the reaction

**Figure 1 | Images of the polycondensation reaction of bis(aryl silyl ether) A-1 with sulfonyl fluoride (SO<sub>2</sub>F<sub>2</sub>).** Left (1<sup>#</sup>): Image at the beginning of the reaction. Right (2<sup>#</sup>): Image at the end of the reaction.

## 2-3, The preparation of bifluoride and poly(hydrogen fluoride) catalysts

### 2-3-1, The preparation of onium bifluoride ( $Q^+[FHF]^-$ ) through ion-exchange of onium halide ( $Q^+X^-$ ) with silver bifluoride ( $Ag^+[FHF]^-$ )

In the glovebox, a 20 mL polypropylene plastic vial equipped with a Teflon-coated stir bar was charged with 80.8 mg silver bifluoride (0.5 mmol). The vial was well-sealed by rubber septum before taken out of the glovebox. Dry acetonitrile (2 mL) was added to give a suspension, which was stirred under  $N_2$  atmosphere. To another vial in the glovebox,  $Q^+X^-$  ( $X = Cl$  or  $Br$ , 0.5 mmol) was weighed. It was later dissolved in 2 mL dry acetonitrile. The solution was transferred dropwise to the stirring  $Ag^+[FHF]^-$  suspension in acetonitrile via a syringe. Another 1 mL acetonitrile was used to wash the onium halide vial and the syringe, which was subsequently added to the reaction mixture. The suspension was vigorously stirred for another 1 hour (5 mL in total). After deposition, the solution was extracted into a 10 mL syringe, then filtered over a micro-filter (4  $\mu m$ ) during the transfer to another  $N_2$  purged dry polypropylene vial (20 mL). The resulting 0.1 M acetonitrile stock solution was used directly (sealed and stored in dry box).

*(Note: To obtain the crystal of  $Q^+[FHF]^-$ , the acetonitrile solution was concentrated to approximately 1 mL. Anhydrous  $Et_2O$  was slowly added until the formation of precipitate. A few drops of dry acetonitrile were added to make the solution slightly unsaturated. The solution was filtrated while being transferred to another plastic vial via syringe, which was later sealed and set in fridge. Colorless crystals were obtained at the bottom of the plastic vial within one or two days.)*

### 2-3-2, The preparation of tris(dimethylamino)sulfonium bifluoride **Q-5**<sup>5</sup>

In the glovebox, to a 20 mL polypropylene plastic vial equipped with a Teflon-coated stir bar was charged with 1.122 g (4.07 mmol) tris(dimethylamino)sulfonium difluorotrimethylsilicate (TASF). The vial was taken out of the glovebox and protected under  $N_2$  atmosphere. Dry acetonitrile (1.0 mL) was added to dissolve TASF. Subsequently with stirring, distilled water (60  $\mu L$ , 3.3 mmol) was added via a micro-syringe. The rapid formation of an oily phase was observed on the top layer. The reaction was maintained stirring for another 30 mins. Acetonitrile was evaporated away to give pale-yellow solid as crude product. Dry tetrahydrofuran (10 mL) was added to wash the crude product for 10 min then removed via syringe thereafter. The resulting crude product was further washed twice with 10 mL of THF. After that, it was dried *in vacuo* (2.0 torr) at ambient temperature for 3 days. **Q-5** was obtained as white solid (791 mg, 95% yield).

### 2-3-3, The preparation of onium dihydrogentrifluoride ( $Q^+[H_2F_3]^-$ ) via ion-exchange of onium halide ( $Q^+X^-$ ) with excess potassium bifluoride<sup>6</sup>

In a 100 mL polypropylene bottle,  $Q^+X^-$  (5.0 mmol) was dissolved in 20 mL  $CH_2Cl_2$  (or  $CH_3CN$ ), which was subsequently equilibrated with 50 mL aqueous solution of potassium bifluoride (19 g,

250.0 mmol) at room temperature for 30 min under vigorous stirring. The aqueous phase was removed by funnel separation (**Caution: use a plastic funnel, do not allow the organic solution touch any glass containers**). The organic solution was treated with another 50 mL aqueous solution of potassium bifluoride (19 g) for another 30 min, and this process was repeated for a third round. Finally, the resulting organic solution was concentrated to give crude product.  $Q^+[H_2F_3]^-$  of higher purity was obtained via crystallization of the crude product in MeOH/Et<sub>2</sub>O (or DCM/Et<sub>2</sub>O).

#### **2-3-4, The preparation of onium hydrogen fluoride ( $Q^+[H_nF_{n+1}]^-$ ) from onium hydroxide ( $Q^+OH^-$ )**

To a 20 mL polypropylene plastic vial equipped with a Teflon-coated stir bar was added 5.0 mmol  $Q^+OH^-$ . The vial was incubated in an ice-water bath for 10 mins under the protection of N<sub>2</sub> atmosphere. A 5(n+1) mmol hydrofluoric acid (48 wt.% in H<sub>2</sub>O) was added dropwise with stirring (n= 1, 2, 3, 4, 5, ...). The mixture was stirred for 10 mins at 0 °C and another 20 mins at room temperature. The resulting  $Q^+[H_nF_{n+1}]^-$  was used as 0.1 M stock solution in CH<sub>3</sub>CN (water introduced by the hydrofluoric acid was not removed).

#### **2-3-5, The preparation of onium hydrogen fluoride ( $Q^+[H_nF_{n+1}]^-$ ) from onium fluoride ( $Q^+F^-$ ), onium bifluoride ( $Q^+[FHF]^-$ ), or onium dihydrogentrifluoride ( $Q^+[H_2F_3]^-$ )**

To a 20 mL polypropylene plastic vial equipped with a Teflon-coated stir bar was added 0.4 mL CH<sub>3</sub>CN solution of  $Q^+F^-$ , ( $Q^+[FHF]^-$  or  $Q^+[H_2F_3]^-$ ), 0.2 mmol, 0.5 M in CH<sub>3</sub>CN). The vial was incubated in an ice-water bath for 10 mins under N<sub>2</sub> atmosphere, then with stirring was added 0.2x mmol of HF (0.5 M in CH<sub>3</sub>CN, prepared from 48 wt.% of hydrofluoric acid and dry CH<sub>3</sub>CN, x = 1, 2, 3, 4, 5, ...). A certain amount of dry CH<sub>3</sub>CN was added to make the concentration of resulting mixture as 0.1 M. The mixture was stirred for 10 mins at 0 °C and another 20 mins at room temperature. The resulting  $Q^+[H_nF_{n+1}]^-$  stock solution was used directly (without the removal of water introduced from hydrofluoric acid).

**2-3-6, The preparation of onium hydrogen fluoride ( $Q^+[H_nF_{n+1}]^-$ ) via ion-exchange of onium chloride " $Q^+Cl^-$ " with anhydrous  $HF^7$**

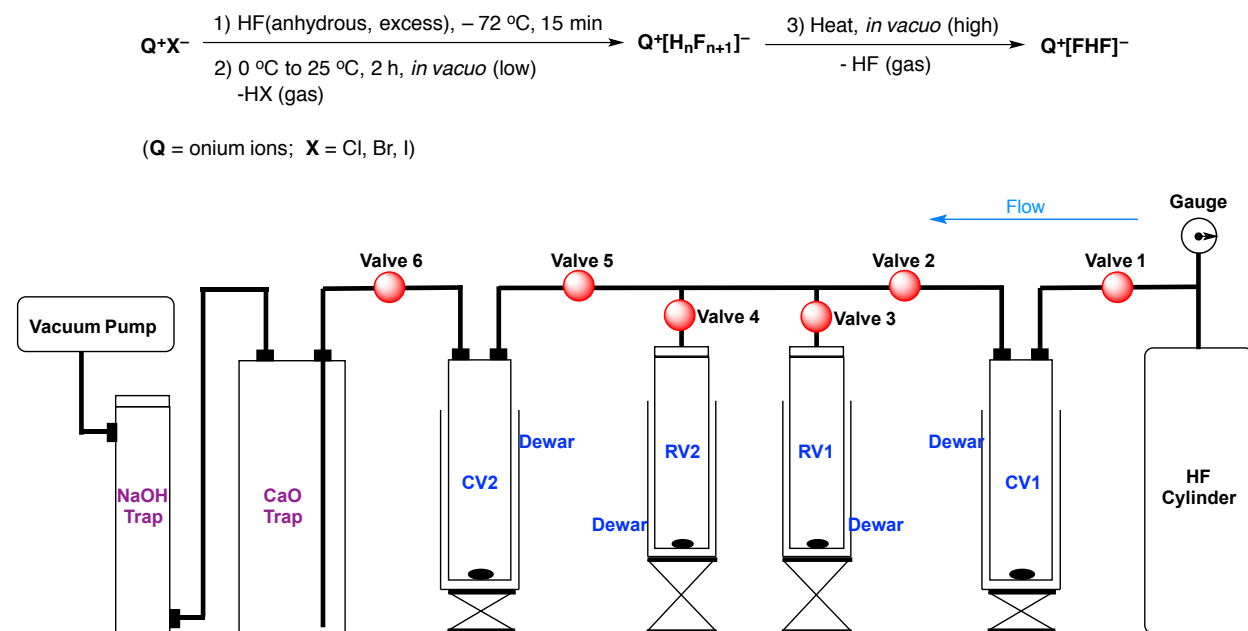

**Figure 2 | Schematic diagram of the ion-exchange apparatus.**

*(Note: Anhydrous hydrogen fluoride is dangerous for its strong corrosiveness and toxicity. It must be manipulated in specific apparatus under the guidance of HF experts. This experiment was conducted at Dr. Philip Dawson’s lab, The Scripps Research Institute, La Jolla campus. The diagram above is a schematic depiction of the Teflon-made apparatus. For more information, please read the reference [7].)*

*(Abbreviation: CV1 = collection vessel No. 1, RV1 = reaction vessel No. 1, RV2 = reaction vessel No. 2, CV2 = collection vessel No. 2)*

- Step 1, check each part of the apparatus and the vacuum conditions of the whole system, make sure they all function well;
- Step 2, close valve 1, 3, and 4 (RV1 and RV2 unloaded), open valve 2, 5, and 6, and the vacuum pump;
- Step 3, close valve 2, 3, and 4, open valve 1, 5, and 6, and then the HF cylinder; CV1 was placed in a dry ice-ethanol Dewar, HF was therefore transferred to CV1. CV2 was kept in a dry ice-ethanol Dewar until otherwise noted;
- Step 4, close HF cylinder, keep CV1 in ice-ethanol Dewar unless otherwise noted. RV1 containing sample 1 and RV2 containing sample 2 were loaded; The Teflon-coated bars inside each vessel were kept stirring;

- *Step 5*, close valve 4, and 5, open valve 1, 2, 3, and 6. RV1 was placed in a dry ice-ethanol Dewar unless otherwise noted; CV1 was heated with warm water (50 °C), A desired amount of HF was transferred from CV1 to RV1;
- *Step 6*, close valve 3 and 5, open valve 1, 2, 4, and 6. RV2 was placed in a dry ice-ethanol Dewar, CV1 was heated with warm water (50 °C), A desired amount of HF was transferred from CV1 to RV2;
- *Step 7*, close valve 3, 4, and 6, open valve 1, 2, and 5; Keep heating CV1 with 50 °C water bath, and cooling RV1, RV2, and CV2 with dry ice-ethanol bath. The residual HF in CV1 was transfer to CV2;
- *Step 8*, open valve 1-5, partly open valve 6; Keep the system under gentle vacuum condition; Replace the dry ice-ethanol bath of RV1 and RV2 with ice water bath; The reactions were maintained at 0 °C for 30 mins; Bubbles of HCl slowly formed from the liquid reaction mixtures and were removed due to the gentle vacuum condition;
- *Step 9*, replace the ice water bath with ambient water bath (25 °C), keep the reaction running for another 1 hour. Bubbles were constantly removed from the liquid reaction mixtures;
- *Step 10*, rise the temperature of water bath to 70 °C and keep the reaction mixture stirring until all the HCl and HF residue were completely removed from RV1 and RV2.
- *Step 11*, fully open valve 1-6, warm CV2 to room temperature with water bath. HF in CV2 was removed and absorbed in CaO trap.
- *Step 12*, close valve 3, and 4, unload RV1 and RV2 and quickly transfer them to glove box; Samples were subsequently transfer from RV1 and RV2 to small polypropylene plastic vials which were store in glove box.
- *Step 13*, work-up (clean RV1 and RV2).

*(Note: The crude product obtained after “Step 12” is normally poly(hydrogen fluoride)  $Q^+[H_nF_{n+1}]^-$  ( $n > 1$ ). It can be converted to bifluoride adduct  $Q^+[FHF]^-$  by further removing HF at higher temperature in vacuo (in PTFE vial). The reaction time and temperature varies depending on specific cations  $Q^+$ , as well as the vacuum conditions involved. For the preparation of  $EMI^+[FHF]^-$ , we obtained  $EMI^+[H_3F_4]^-$  after “Step 12” as colorless liquid. It was further heated at 90 °C for 14 hours in vacuo (oil pump, 2.0 torr), giving  $EMI^+[FHF]^-$  as waxy solid.)*



## 2-4, Catalyst evaluation

The synthesis of **P-1** from the polycondensation of **A-1** (2.0 mmol) and **B-1** (2.0 mmol) was employed as model reaction for the catalyst evaluation. Experiments were conducted following the general procedure described in *Supplementary Section 2-2-1* unless otherwise noted. Number-average molecular weight ( $M_n^{PS}$ ) and polydispersity (PDI) were recorded on GPC. In most cases, catalyst-loadings listed in Table 1 and Table 2 are the minimum molar ratio required to give polysulfates with  $M_n^{PS}$  higher than 20 kDa. Therefore, the catalyst-loadings may vary based on specific catalyst employed. All catalyst-loading is the mole ratio to the total amount of both monomers, not to one monomer. Because each (**A** or **B**) monomer has two reactive sites.

**Table 1 | Evaluation of bifluoride catalysts with DBU and BEMP as controls.**

| Entry          | Catalysts                                                                                             | Loading (mole ratio) | $M_n^{PS}$ (kDa) | PDI |
|----------------|-------------------------------------------------------------------------------------------------------|----------------------|------------------|-----|
| 1              | DBU                                                                                                   | 10%                  | 30               | 1.4 |
| 2              | BEMP                                                                                                  | 1%                   | 88               | 1.6 |
| 3 <sup>a</sup> | KF                                                                                                    | 2.0%                 | oligomers        |     |
| 4 <sup>a</sup> | K <sup>+</sup> [FHF] <sup>-</sup>                                                                     | 2.0%                 | 28               | 1.4 |
| 5 <sup>a</sup> | K <sup>+</sup> [FHF] <sup>-</sup>                                                                     | 1.0%                 | oligomers        |     |
| 6 <sup>a</sup> | K <sup>+</sup> [FHF] <sup>-</sup> (+ Bu <sub>4</sub> NCl)                                             | 2.0% (+ 1.0%)        | 91               | 1.5 |
| 7 <sup>a</sup> | K <sup>+</sup> [FHF] <sup>-</sup> (+ 18-crown-6 ether)                                                | 2.0% (+ 1.0%)        | 103              | 1.5 |
| 8 <sup>a</sup> | NH <sub>4</sub> <sup>+</sup> [FHF] <sup>-</sup>                                                       | 2.0%                 | no reaction      |     |
| 9              | Me <sub>4</sub> N <sup>+</sup> [FHF] <sup>-</sup> ( <b>Q-1</b> )                                      | 0.1%                 | 34               | 1.4 |
| 10             | Et <sub>4</sub> N <sup>+</sup> [FHF] <sup>-</sup>                                                     | 0.2%                 | 82               | 1.6 |
| 11             | <i>n</i> -Bu <sub>4</sub> N <sup>+</sup> [FHF] <sup>-</sup> ( <b>Q-2</b> )                            | 0.1%                 | 46               | 1.5 |
| 12             | [PhCH <sub>2</sub> N(CH <sub>2</sub> CH <sub>3</sub> ) <sub>3</sub> ] <sup>+</sup> [FHF] <sup>-</sup> | 0.1%                 | 34               | 1.5 |
| 13             | 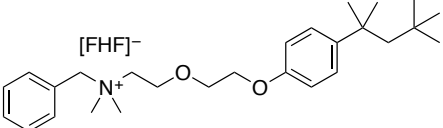                   | 0.25%                | 56               | 1.8 |
| 14             |                    | 0.1%                 | 12               | 1.3 |

|                 |                                                                                                                                 |       |     |     |
|-----------------|---------------------------------------------------------------------------------------------------------------------------------|-------|-----|-----|
| 15              | 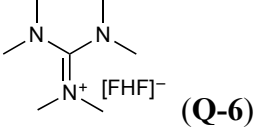 (Q-6)                                         | 0.08% | 101 | 2.0 |
| 16              |  (Q-7)                                         | 0.25% | 78  | 1.6 |
| 17              | Me <sub>4</sub> P <sup>+</sup> [FHF] <sup>-</sup>                                                                               | 0.1%  | 38  | 1.6 |
| 18              | <i>n</i> -Bu <sub>4</sub> P <sup>+</sup> [FHF] <sup>-</sup>                                                                     | 0.5%  | 76  | 2.4 |
| 19              | [ <i>n</i> -Bu <sub>3</sub> P(CH <sub>2</sub> ) <sub>15</sub> CH <sub>3</sub> ] <sup>+</sup> [FHF] <sup>-</sup> (Q-9)           | 0.1%  | 82  | 1.6 |
| 20              | [Ph <sub>3</sub> PMe] <sup>+</sup> [FHF] <sup>-</sup>                                                                           | 0.5%  | 89  | 1.6 |
| 21              | [Ph <sub>3</sub> P(CH <sub>2</sub> CH <sub>2</sub> CH <sub>3</sub> )] <sup>+</sup> [FHF] <sup>-</sup>                           | 0.2%  | 88  | 1.7 |
| 22              | [Ph <sub>3</sub> P(CH <sub>2</sub> OCH <sub>3</sub> )] <sup>+</sup> [FHF] <sup>-</sup>                                          | 0.5%  | 53  | 1.6 |
| 23              |  [FHF] <sup>-</sup>                            | 0.15% | 51  | 1.6 |
| 24              |  (PNP <sup>+</sup> [FHF] <sup>-</sup> , Q-10) | 0.1%  | 77  | 1.6 |
| 25              | Ph <sub>4</sub> As <sup>+</sup> [FHF] <sup>-</sup> (Q-8)                                                                        | 0.25% | 86  | 1.6 |
| 26              |  (Q-3)                                       | 0.1%  | 83  | 1.7 |
| 27              |  [FHF] <sup>-</sup>                          | 0.5%  | 72  | 1.6 |
| 28              |  (Q-4)                                       | 0.1%  | 47  | 1.7 |
| 29              | (Me <sub>2</sub> N) <sub>3</sub> S <sup>+</sup> [Me <sub>3</sub> SiF <sub>2</sub> ] <sup>-</sup> (TASF)                         | 0.25% | 116 | 1.8 |
| 30              | (Me <sub>2</sub> N) <sub>3</sub> S <sup>+</sup> [FHF] <sup>-</sup> (Q-5)                                                        | 0.05% | 92  | 1.7 |
| 31              | Q-5                                                                                                                             | 0.10% | 120 | 1.6 |
| 32              | Q-5                                                                                                                             | 0.5%  | 98  | 1.7 |
| 33              | Q-5                                                                                                                             | 1.0%  | 122 | 2.0 |
| 34 <sup>b</sup> | Q-5                                                                                                                             | 0.1%  | 28  | 1.6 |

|                 |     |      |    |     |
|-----------------|-----|------|----|-----|
| 35 <sup>c</sup> | Q-5 | 0.1% | 19 | 1.3 |
|-----------------|-----|------|----|-----|

All bifluoride salts with organic cations were used as 0.1 M stock solution in CH<sub>3</sub>CN. <sup>a</sup> The reaction was allowed to run for 17 hours. <sup>b</sup> Trimethyl silyl ether (TMS) of bisphenol-A was used. <sup>c</sup> Triethyl silyl ether (TES) of bisphenol-A was used.

**Table 2 | Evaluation of poly(hydrogen fluoride) salts as catalyst.**

| Entry | Catalyst                                                                                                                            | Loading (mole ratio) | M <sub>n</sub> <sup>ps</sup> (kDa) | PDI |
|-------|-------------------------------------------------------------------------------------------------------------------------------------|----------------------|------------------------------------|-----|
|       |                                                                                                                                     |                      |                                    |     |
| 1     | PNP <sup>+</sup> [H <sub>2</sub> F <sub>3</sub> ] <sup>-</sup> ( <b>Q-11</b> )                                                      | 0.25%                | 128                                | 1.8 |
| 2     | PNP <sup>+</sup> [H <sub>2</sub> F <sub>3</sub> ] <sup>-</sup> + HF (aq. 48 wt.%)<br>(1:1 mole ratio) ( <b>Q-12</b> )               | 0.5%                 | 81                                 | 1.6 |
| 3     | PNP <sup>+</sup> [H <sub>2</sub> F <sub>3</sub> ] <sup>-</sup> + HF (aq. 48 wt.%)<br>(1:2 mole ratio) ( <b>Q-13</b> )               | 0.5%                 | 58                                 | 1.5 |
| 4     | PNP <sup>+</sup> [H <sub>2</sub> F <sub>3</sub> ] <sup>-</sup> + HF (aq. 48 wt.%)<br>(1:7 mole ratio) ( <b>Q-14</b> )               | 0.5%                 | 20                                 | 1.3 |
| 5     | <i>n</i> -Bu <sub>4</sub> N <sup>+</sup> F <sup>-</sup> (H <sub>2</sub> O) <sub>3</sub> + HF (aq. 48 wt.%)<br>(1:2 mole ratio)      | 0.5%                 | 58                                 | 1.6 |
| 6     | <i>n</i> -Bu <sub>4</sub> N <sup>+</sup> F <sup>-</sup> (H <sub>2</sub> O) <sub>3</sub> + HF (aq. 48 wt.%)<br>(1:3 mole ratio)      | 0.5%                 | 68                                 | 1.5 |
| 7     | <i>n</i> -Bu <sub>4</sub> N <sup>+</sup> F <sup>-</sup> (H <sub>2</sub> O) <sub>3</sub> + HF (aq. 48 wt.%)<br>(1:9 mole ratio)      | 0.5%                 | 20                                 | 1.3 |
| 8     | <i>n</i> -Bu <sub>4</sub> N <sup>+</sup> F <sup>-</sup> (H <sub>2</sub> O) <sub>3</sub> + Py(HF) <sub>x</sub><br>(1:1 mole ratio)   | 0.4%                 | 24                                 | 1.4 |
| 9     | <i>n</i> -Bu <sub>4</sub> N <sup>+</sup> F <sup>-</sup> (H <sub>2</sub> O) <sub>3</sub> + Et <sub>3</sub> N·3HF<br>(1:1 mole ratio) | 0.4%                 | 41                                 | 1.5 |
| 10    | <i>n</i> -Bu <sub>4</sub> N <sup>+</sup> Cl <sup>-</sup> + Py(HF) <sub>x</sub><br>(1:1 mole ratio)                                  | 0.1~10%              | no reaction                        |     |

|    |                                                                                                                                                |          |             |     |
|----|------------------------------------------------------------------------------------------------------------------------------------------------|----------|-------------|-----|
| 11 | $n\text{-Bu}_4\text{N}^+\text{Cl}^- + \text{Et}_3\text{N} \cdot 3\text{HF}$<br>(1:1 mole ratio)                                                | 0.1~10%  | no reaction |     |
| 12 | $n\text{-Bu}_4\text{P}^+[\text{H}_2\text{F}_3]^-$                                                                                              | 0.25%    | 54          | 1.7 |
| 13 | $[\text{PhCH}_2\text{PPh}_3]^+[\text{H}_2\text{F}_3]^-$                                                                                        | 0.5%     | 66          | 2.2 |
| 14 | 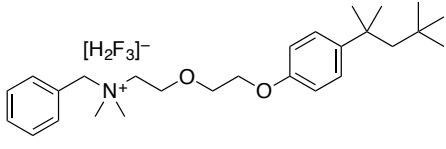<br>$[\text{H}_2\text{F}_3]^-$                                | 0.25%    | 71          | 1.6 |
| 15 | <br>$[\text{H}_2\text{F}_3]^-$                                | 0.25%    | 31          | 1.5 |
| 16 | <br>$[\text{H}_3\text{F}_4]^-$                                | 0.5%     | 35          | 1.5 |
| 17 | HF (aq. 48 wt.%)                                                                                                                               | 0.5~10%  | oligomers   |     |
| 18 | $\text{Et}_3\text{N}(\text{HF})_3$                                                                                                             | 0.5~10%  | oligomers   |     |
| 19 | Py(HF) <sub>x</sub> (Olah's reagent, 70 wt.% HF)                                                                                               | 0.5~10%  | oligomers   |     |
| 20 | DBU + HF (aq. 48 wt.%)<br>(1:2, mole ratio)                                                                                                    | 10%      | 15          | 1.3 |
| 21 | BEMP + HF (aq. 48 wt.%)<br>(1:2, mole ratio)                                                                                                   | 5%       | 32          | 1.5 |
| 22 | <br>(proton sponge)<br>+ HF (aq. 48 wt.%) (1:1, mole ratio) | 0.5~1.0% | oligomers   |     |
| 23 | <br>(proton sponge)<br>+ HF (aq. 48 wt.%) (1:2, mole ratio) | 0.5~1.0% | oligomers   |     |

## 2-5, The effect of reaction temperature on the polycondensation of A-1 and B-1

### 2-5-1, General procedure monitoring the polymerization process (80 °C)

**A-1** (1.570 g, 4.0 mmol) and **B-1** (1.827 g, 4.0 mmol) were combined in a two-neck 25 mL round-bottom flask, equipped with a Teflon-coated magnetic stir bar and a reflux condenser. The flask was purged with nitrogen gas. Dry NMP (4.0 mL) was added, and the flask was placed into a pre-heated 80 °C oil bath with stirring. Thermal equilibrium was established between the solution in the flask and the oil bath within 5 mins. Catalyst **Q-5** (0.5 mol%, 0.1 M in dry CH<sub>3</sub>CN) was added via micro-syringe. The reaction was triggered instantly upon the addition of catalyst. 2 min later after the addition of catalyst, the first batch of sample (0.1 mL) was extracted from the reaction mixture via a syringe. About 0.02 mL of the sample was dissolved in 0.7 mL of *d*<sup>2</sup>-DCM and was subjected to <sup>19</sup>F NMR and <sup>1</sup>H NMR analysis (Fig. 4, 5). The other 0.08 mL was quenched in excess MeOH to give white powder precipitate. After filtration, the white powder was dried in a 70 °C oven for 2 hours, then subjected to GPC analysis. As the polymerization proceeded, the reaction mixture was constantly monitored by GPC following the procedure above, over a course of 5 hours (Table 3 & Fig. 3).

### 2-5-2, Summary of experimental data.

Table 3, Summary of molecular weight and polydispersity at 80 °C, 100 °C, and 120 °C.

| Checkpoint (min) | 80 °C                              |     | 100 °C                             |     | 120 °C                             |     |
|------------------|------------------------------------|-----|------------------------------------|-----|------------------------------------|-----|
|                  | M <sub>n</sub> <sup>ps</sup> (kDa) | PDI | M <sub>n</sub> <sup>ps</sup> (kDa) | PDI | M <sub>n</sub> <sup>ps</sup> (kDa) | PDI |
| 2                | 27                                 | 1.5 | 35                                 | 1.5 | 43                                 | 1.5 |
| 5                | 27                                 | 1.4 | 36                                 | 1.5 | 47                                 | 1.5 |
| 10               | 29                                 | 1.5 | 38                                 | 1.6 | 52                                 | 1.5 |
| 20               | 30                                 | 1.5 | 41                                 | 1.6 | 57                                 | 1.6 |
| 30               | 32                                 | 1.5 | 42                                 | 1.6 | 63                                 | 1.5 |
| 40               | 32                                 | 1.5 | 45                                 | 1.5 | 69                                 | 1.5 |
| 50               | 33                                 | 1.5 | 50                                 | 1.5 | 71                                 | 1.5 |
| 60               | 32                                 | 1.5 | 51                                 | 1.5 | 71                                 | 1.6 |
| 90               | 34                                 | 1.5 | 54                                 | 1.6 | 71                                 | 1.6 |
| 120              | 34                                 | 1.5 | 55                                 | 1.6 | 74                                 | 1.6 |
| 150              | 39                                 | 1.4 | 61                                 | 1.6 | 73                                 | 1.6 |

|     |    |     |    |     |    |     |
|-----|----|-----|----|-----|----|-----|
| 180 | 36 | 1.5 | 60 | 1.6 | 76 | 1.5 |
| 210 | 38 | 1.5 | 63 | 1.6 | 74 | 1.6 |
| 240 | 39 | 1.4 | 66 | 1.6 | 75 | 1.6 |
| 270 | 39 | 1.5 | 67 | 1.6 | 76 | 1.6 |
| 300 | 41 | 1.5 | 67 | 1.6 | 74 | 1.6 |

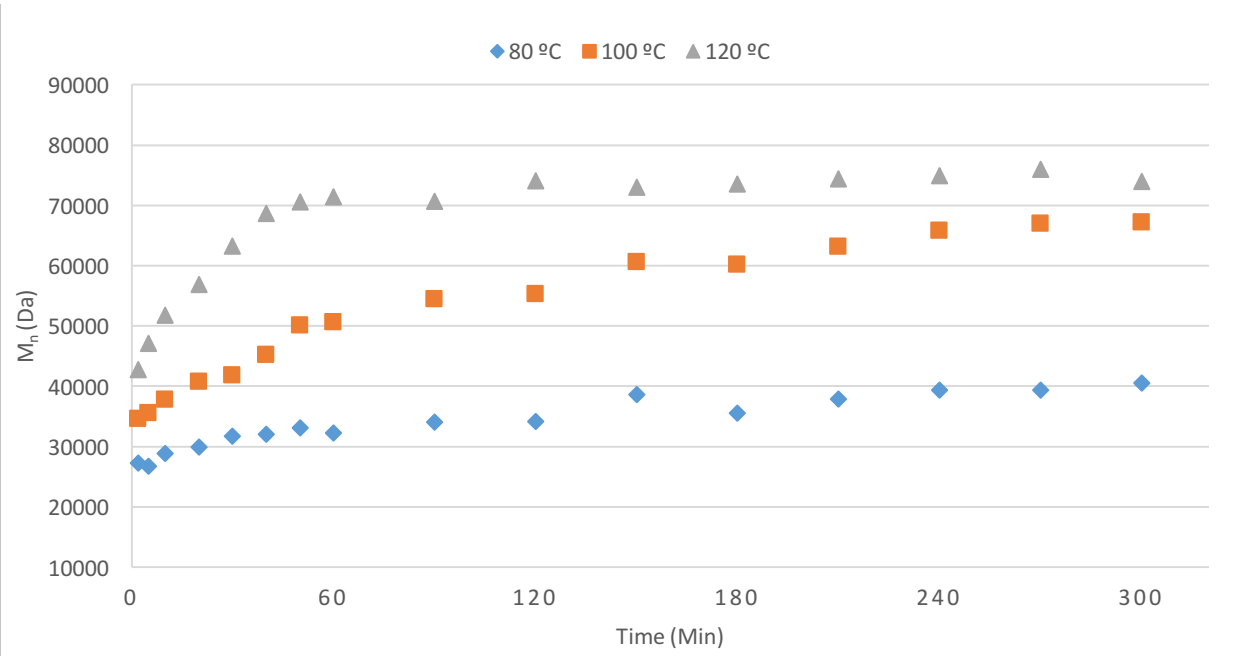

Figure 3 | Plot of the molecular weight ( $M_n^{PS}$ ) vs reaction time at different reaction temperatures.

<sup>1</sup>H NMR (400 MHz, Chloroform-*d*)  
before the addition of catalyst **Q-5**

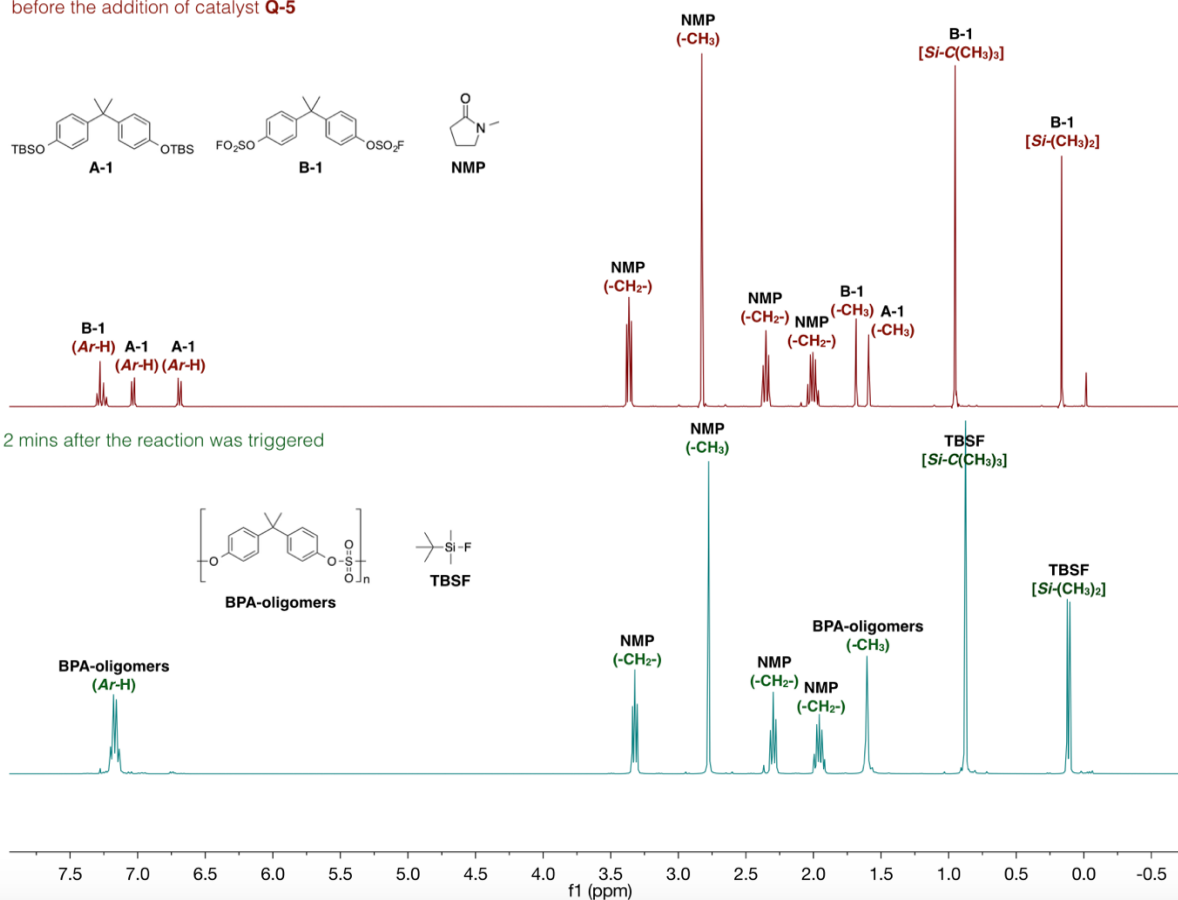

Figure 4 | <sup>1</sup>H NMR spectra of the polymerization (before, and 2 mins after the addition of the catalyst).

<sup>19</sup>F NMR (376 MHz, Chloroform-*d*)  
before the addition of catalyst **Q-5**

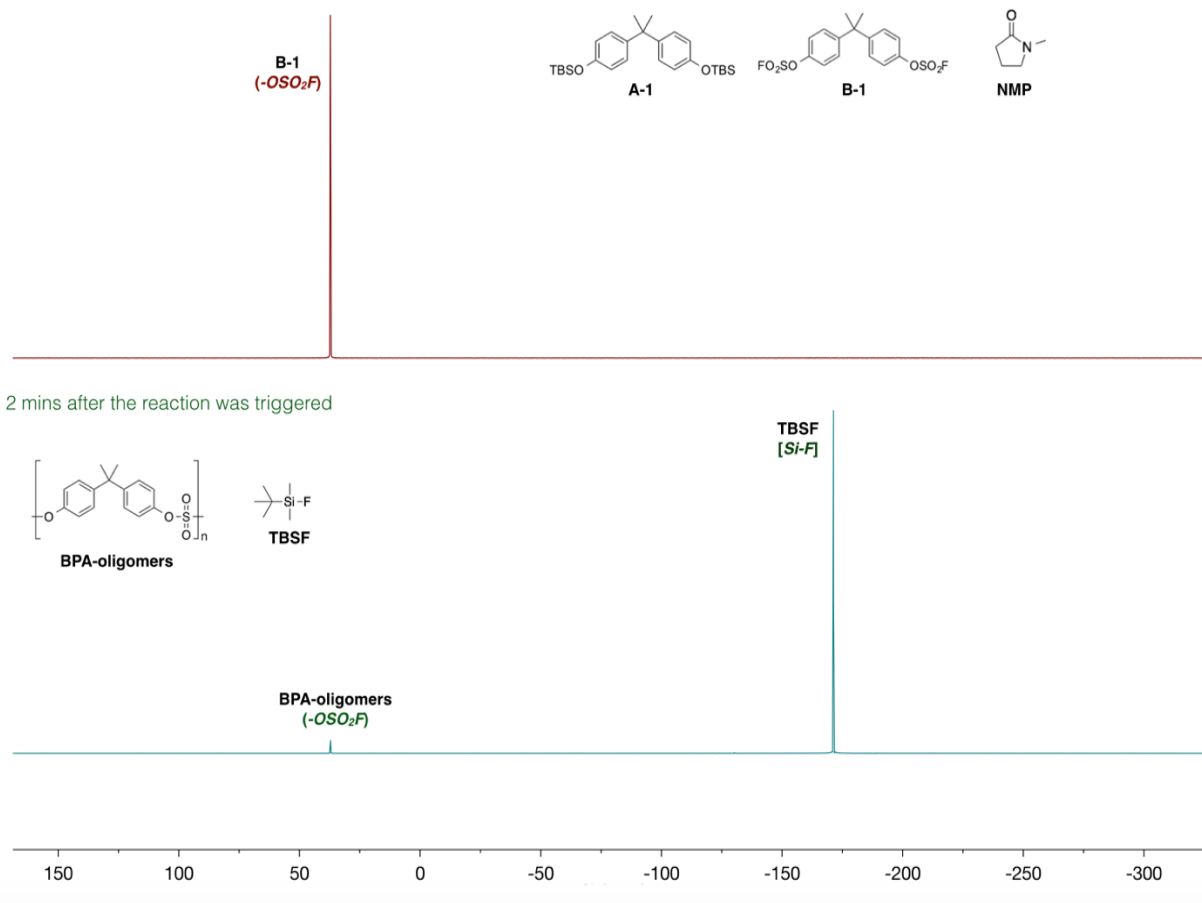

Figure 5 | <sup>19</sup>F NMR spectra of the polymerization (before, and 2 mins after the addition of the catalyst).



## 2-6, The effect of mono-functional chain terminators on the molecular weight of polysulfate

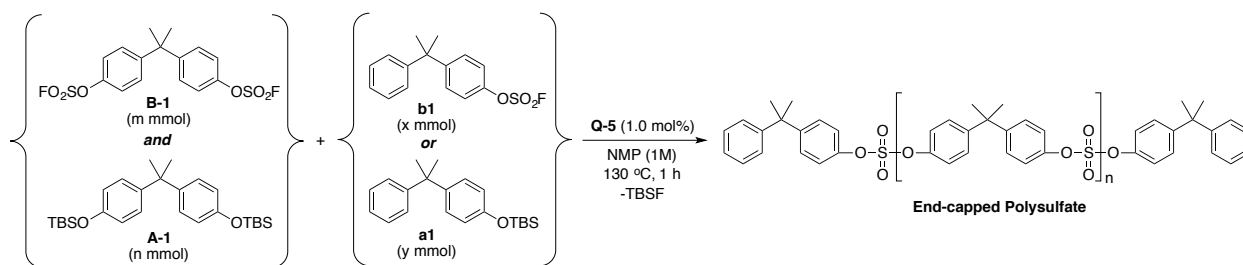

Two sets of experiments were carried out. In the first set, difunctional monomer **B-1** (1.0 mmol) was in excess over **A-1** ( $n$  mmol). Monofunctional monomer **a1** ( $y$  mmol,  $y = 2 - 2n$ ) was employed to make the total amounts of both functionalities ( $-\text{OSO}_2\text{F}$  and  $-\text{OTBS}$ ) in equal equivalent. In the other set, difunctional monomer **A-1** (1.0 mmol) was in excess over **B-1** ( $m$  mmol), and monofunctional monomer **b1** ( $x$  mmol,  $x = 2 - 2m$ ) was employed to make the total amounts of both functionalities ( $-\text{OSO}_2\text{F}$  and  $-\text{OTBS}$ ) in equal equivalent. All experiments were conducted at  $130\text{ }^\circ\text{C}$  in NMP (1.0 M) for one hour, with a 1.0 mol% of **Q-5** as catalysts. One example is given as below.

Monomers **B-1** (392.4 mg, 1.0 mmol), **A-1** (434.0 mg, 0.95 mmol), and **a1** (32.7 mg, 0.1 mmol) were combined in a 10 mL oven-dried glass vial. The vial was equipped with a Teflon-coated magnetic stir bar and screw-capped with a Teflon-coated rubber septum. Degassed and then refilled with nitrogen, the vial was subsequently connected to a  $\text{N}_2$  balloon via a syringe. Dry NMP (1.0 mL) was injected in, then it was placed into a pre-heated  $130\text{ }^\circ\text{C}$  oil bath with stirring. Catalyst **Q-5** (0.2 M in dry  $\text{CH}_3\text{CN}$ , 100  $\mu\text{l}$ ) was added via a micro-syringe. The reaction was allowed running for 1 hour, then 4 mL DMF was added to dissolve the resulting polymer. The warm DMF solution was poured into 50 mL of cold methanol under vigorous stirring. Polysulfate precipitated in the form of fiber or powder once the warm DMF solution touched the cold methanol. The precipitate was collected via filtration and dried at  $70\text{ }^\circ\text{C}$  for 2 hours under vacuum condition (2.0 torr). Molecular weight and polymer distribution was determined on GPC (Table 4).

**Table 4.** The effect of mono-functional chain terminators as additives on the molecular weight and polydispersity of resulting polysulfates.

| Entry | <b>B-1</b> (equiv.) | <b>A-1</b> (equiv.) | <b>a1/b1</b> (equiv.) | Yield | $M_n^{ps}$ (kDa) | PDI |
|-------|---------------------|---------------------|-----------------------|-------|------------------|-----|
| 1     | 1.0                 | 1.0                 |                       | >99%  | 72               | 1.6 |
| 2     | 1.0                 | 0.9975              | <b>a1</b> (0.005)     | 99%   | 55               | 1.6 |
| 3     | 1.0                 | 0.995               | <b>a1</b> (0.01)      | 97%   | 48               | 1.5 |
| 4     | 1.0                 | 0.99                | <b>a1</b> (0.02)      | 96%   | 30               | 1.5 |
| 5     | 1.0                 | 0.98                | <b>a1</b> (0.04)      | 96%   | 30               | 1.5 |

|    |        |      |                   |      |    |     |
|----|--------|------|-------------------|------|----|-----|
| 6  | 1.0    | 0.97 | <b>a1</b> (0.06)  | 93%  | 29 | 1.4 |
| 7  | 1.0    | 0.96 | <b>a1</b> (0.08)  | 89%  | 25 | 1.3 |
| 8  | 1.0    | 0.95 | <b>a1</b> (0.10)  | 66%  | 21 | 1.3 |
| 9  | 0.9975 | 1.0  | <b>b1</b> (0.005) | >99% | 60 | 1.4 |
| 10 | 0.995  | 1.0  | <b>b1</b> (0.01)  | >99% | 49 | 1.6 |
| 11 | 0.99   | 1.0  | <b>b1</b> (0.02)  | 99%  | 36 | 1.5 |
| 12 | 0.98   | 1.0  | <b>b1</b> (0.04)  | 89%  | 30 | 1.5 |
| 13 | 0.97   | 1.0  | <b>b1</b> (0.06)  | 93%  | 25 | 1.4 |
| 14 | 0.96   | 1.0  | <b>b1</b> (0.08)  | >99% | 23 | 1.4 |
| 15 | 0.95   | 1.0  | <b>b1</b> (0.10)  | 96%  | 22 | 1.4 |

## 2-7, Post-polymerization modification of polysulfates

(Converting methoxy group (-OMe) of polysulfate **P-11a** to fluorosulfate (-OSO<sub>2</sub>F))

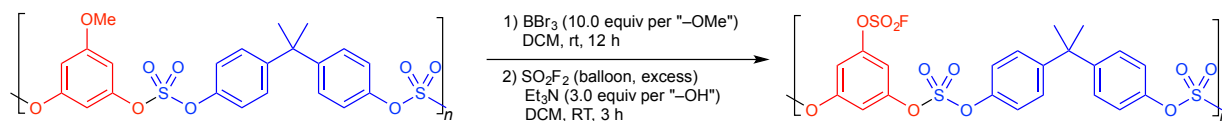

*Step 1*, To an oven-dried two-neck flask (50 mL) equipped with a stir bar, was added 492 mg of polysulfate **P-11a** (approximately 1.0 mmol of methoxy groups, calculated based on the molecular weight of smallest repeat unit). The flask was sealed by rubber septum and protected under nitrogen atmosphere. The polymer was dissolved in 10 mL anhydrous CH<sub>2</sub>Cl<sub>2</sub> under stirring. BBr<sub>3</sub> (10.0 mol) was added dropwise to the stirring solution at room temperature. The reaction was maintained stirring overnight (12 hours). As monitored by <sup>1</sup>H NMR, the methoxy group was completely consumed. The mixture was concentrated to 1~2 mL, then dropped to cold water under vigorous stirring. White fiber crashed out on the surface of water. The polymer fiber was later collected via filtration, washed three times with distilled water, then dried *in vacuo* (2.0 torr) at 50 °C for 2 hours.

*Step 2*, The crude product obtained in *step 1* was dissolved in DCM (10 mL) in a 50 mL single-neck flask. Et<sub>3</sub>N (1.0 mL, 7.26 mmol) was added to the stirring solution. The flask was sealed by rubber septum and left stirring for 15 mins at room temperature. The flask was charged with gentle vacuum condition, then filled with excess SO<sub>2</sub>F<sub>2</sub> gas (supplied via a syringe connected balloon). The reaction was kept running at room temperature, monitored by <sup>1</sup>H NMR and <sup>19</sup>F NMR until it went complete. The resulting solution was concentrated to 1~2 mL, dropped to the co-solvent of MeOH and H<sub>2</sub>O (1:2, v/v). White polymer powder crashed out. The powder was collected via filtration and washed with distilled water three times. It was later dried *in vacuo* (2.0 torr) at 50 °C for 5 hours (311 mg, 55% yield for two steps), then subjected to GPC analysis.

## 2-8, 100-gram scale synthesis of polysulfate P-1 catalyzed by Q-5

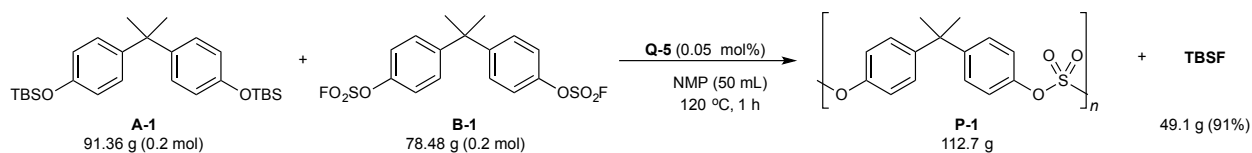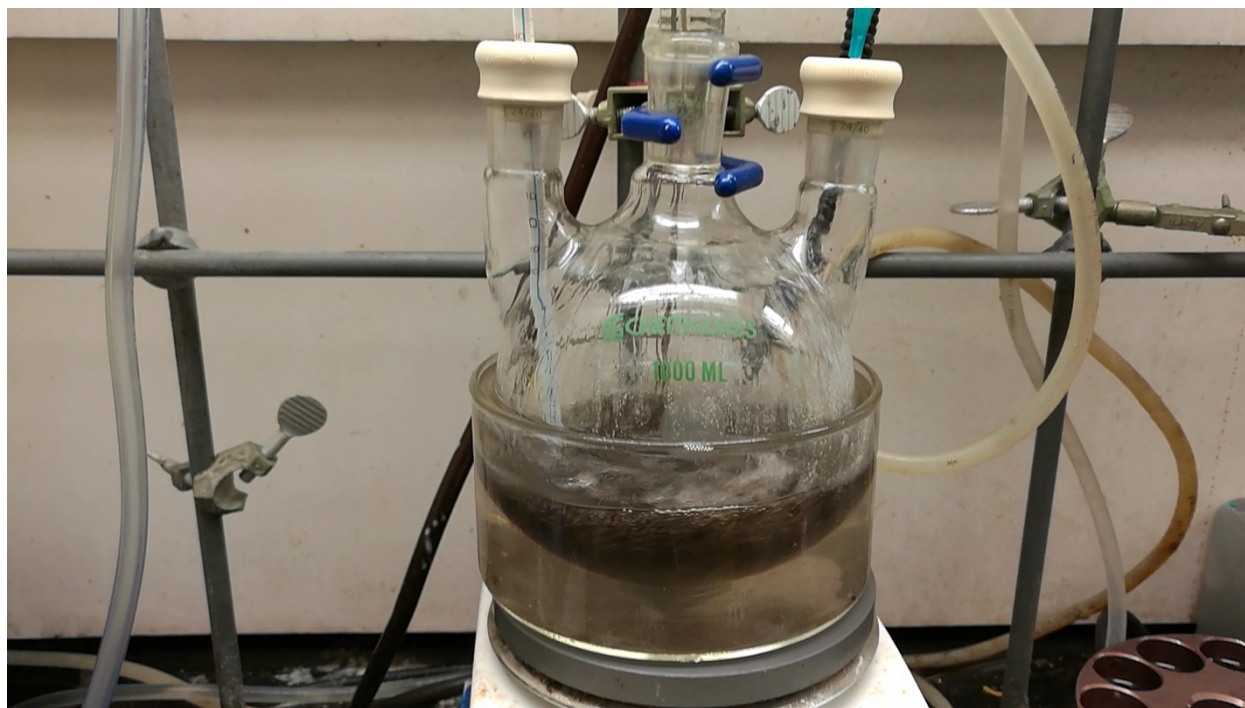

Figure 6 | Image of the large scale synthesis of P-1 catalyzed by Q-5.

Monomers **A-1** (91.36 g, 0.2 mol) and **B-1** (78.48 g, 0.2 mol) were combined in a dry 1 L three-neck round-bottom flask equipped with a Teflon<sup>TM</sup>-coated magnetic stir bar, a thermometer, and a reflux condenser. The flask was purged with nitrogen gas, to which dry NMP (50 mL) was added. The flask was put into a pre-heated oil bath (130 °C, oil temperature). Monomers were gradually dissolved in NMP, and the internal temperature stabilized at 123 °C. Under vigorous stirring, catalyst **Q-5** (0.1 M in dry CH<sub>3</sub>CN, 2.0 mL, 0.0002 mol) was added. The reaction initiated instantaneously. The internal temperature first rose to 135 °C, then quickly dropped to 100 °C ~ 110 °C because of the refluxing of TBSF. The polymerization reaction was allowed to run for 1 h, during which course the reaction mixture turned highly viscous and the internal temperature stabilized at around 120 °C. The flask was subsequently cooled to room temperature. TBSF was then distilled out from the reaction mixture as colorless oil at 80 °C under gentle vacuum conditions (49.1 g, 91% yield, Fig. 7). After the distillation, 250 mL of DMF was added to the reaction flask to dissolve the polymer at 120 °C. The warm DMF solution was then slowly dropped into 2 L methanol with vigorous mechanical stirring at room temperature. White **P-1** fibers precipitated in methanol, which was collected via filtration, then dried at 70 °C for 12 h to give 112.7 g dry

polymer ( $M_n^{ps} = 110$  kDa, PDI = 1.7, Fig. 7 & 8), DSC ( $T_g = 89.6$  °C, Fig. 9) and TGA (5% decomposition at 370.3 °C, Fig. 10) analysis. The cyclic oligomer in **P-1** is between 3 wt. %- 4 wt. % based on  $^1\text{H}$  NMR analysis.

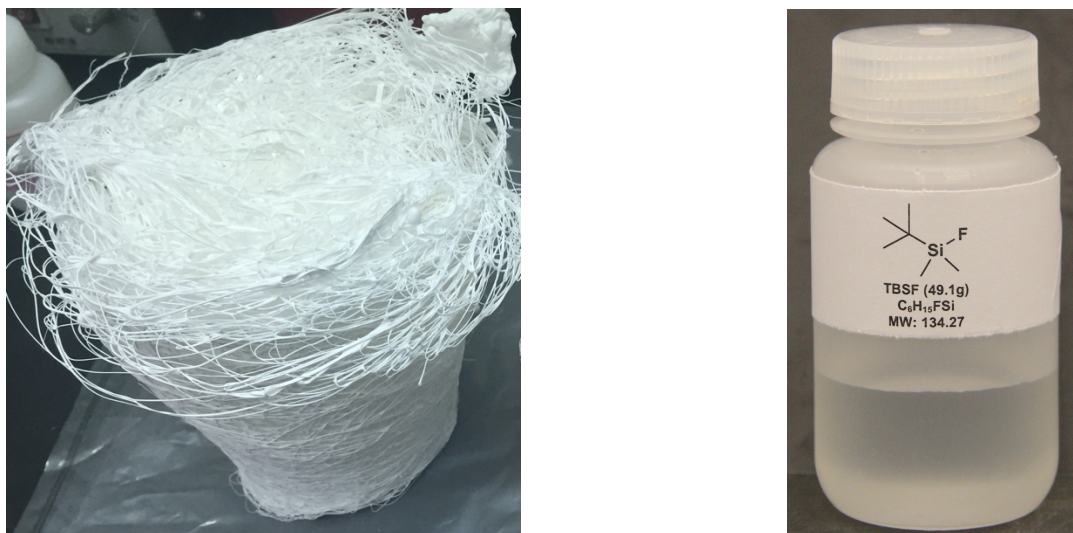

Figure 7 | Dry P-1 as fibrous solid (left) and TBSF in a plastic bottle (right).

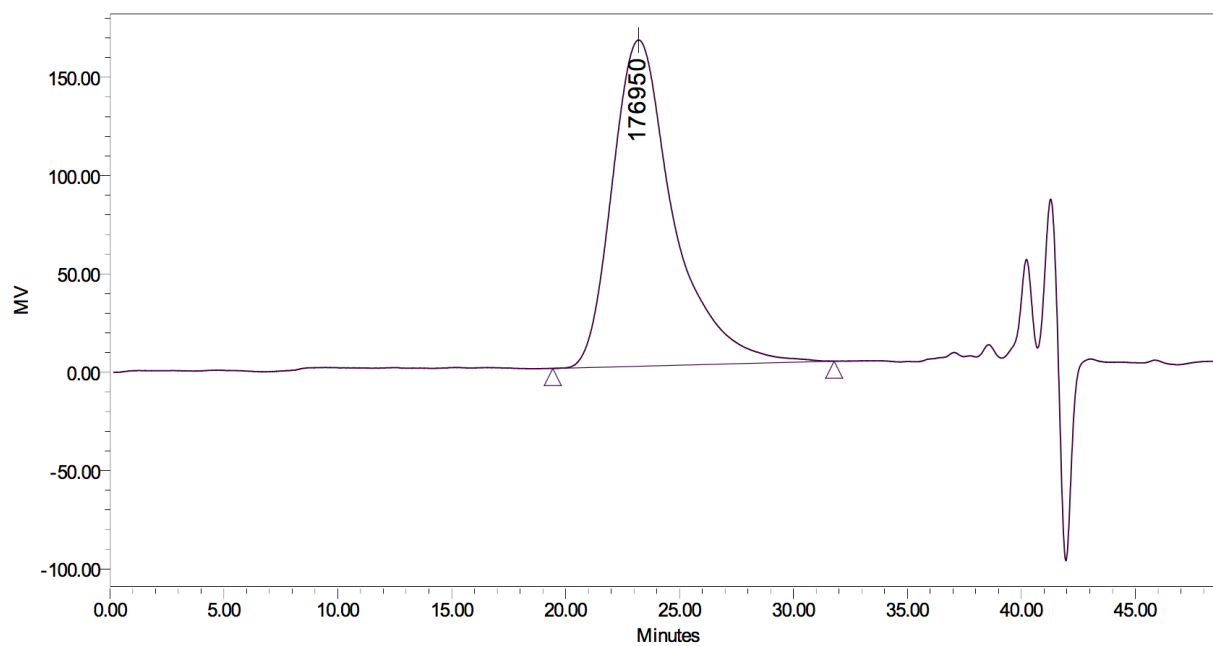

Broad Unknown Relative Peak Table

|   | Distribution Name | Mn (Daltons) | Mw (Daltons) | MP (Daltons) | Mz (Daltons) | Mz+1 (Daltons) | Polydispersity | Mz/Mw    | Mz+1/Mw  |
|---|-------------------|--------------|--------------|--------------|--------------|----------------|----------------|----------|----------|
| 1 |                   | 11092€       | 191634       | 176950       | 304964       | 459222         | 1.727585       | 1.591389 | 2.396351 |

Figure 8 | GPC trace of the P-1.

Sample: BPA-PS  
Size: 3.9060 mg  
Method: Ramp

### TGA

File: C:\TA\Data\TGA\Liana\Peng Wu\BPA-PS.004  
Operator: Liana  
Run Date: 11-Apr-2016 14:07  
Instrument: TGA Q5000 V3.17 Build 265

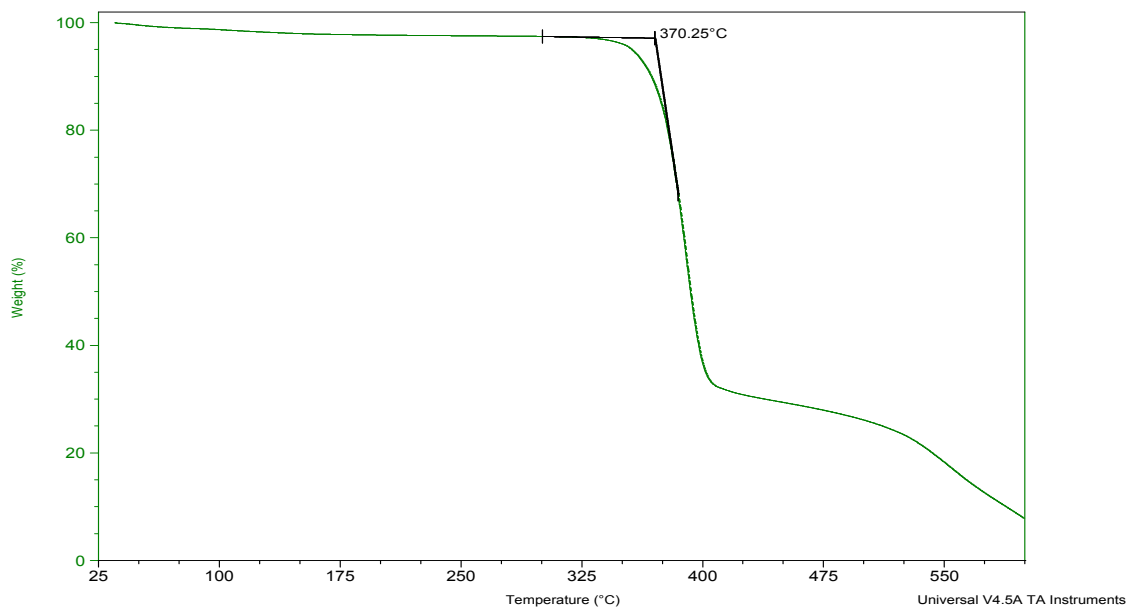

Figure 9 | Thermal gravimetric analysis (TGA) of P-1 (5 % weight loss at 370.3 °C).

Sample: BPA-PS  
Size: 5.5800 mg  
Method: Heat/Cool/Heat

### DSC

File: C:\DSC\Users\Liana\Peng Wu\BPA-PS.001  
Operator: Liana  
Run Date: 26-Apr-2016 10:01  
Instrument: DSC Q200 V24.11 Build 124

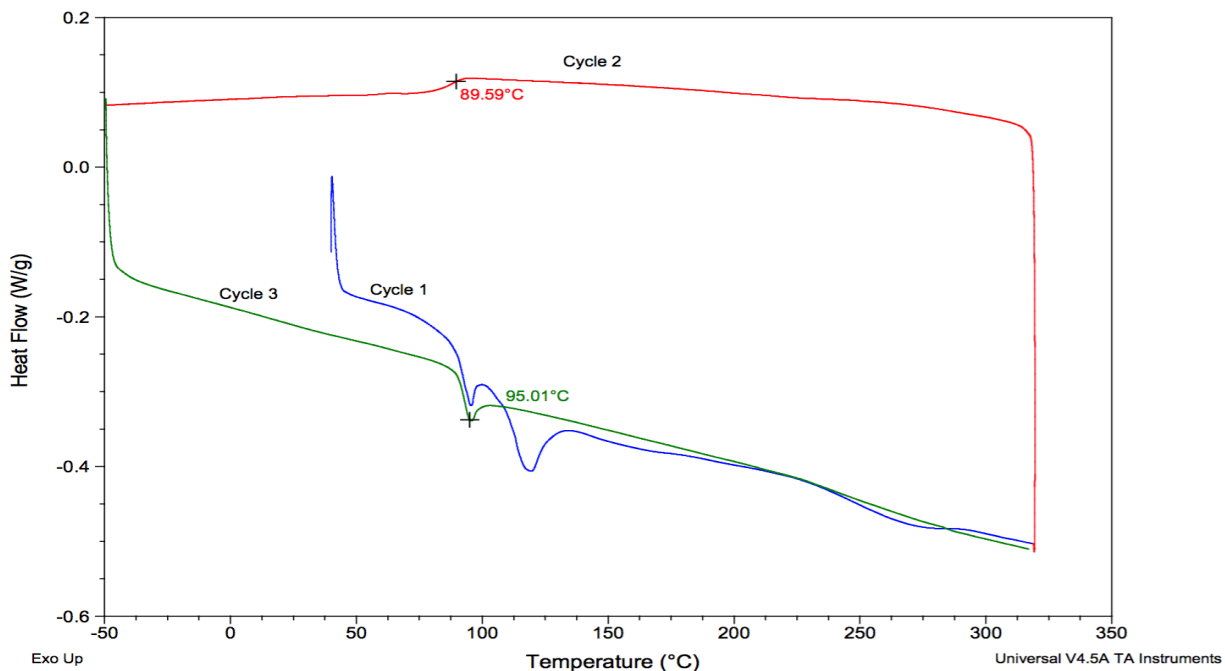

Figure 10 | Differential scanning calorimetry (DSC) analysis of P-1.

## 2-9, The preparation of monomer A-1 from bisphenol-A and TBSF

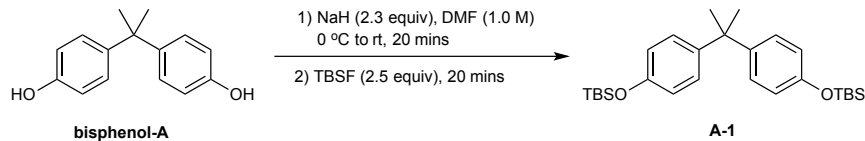

A 50 mL three-neck flask, equipped with a stir bar, was purged with nitrogen gas. Bisphenol-A (1.14 g, 5 mmol) was dissolved in 5 mL dry DMF in the flask. The flask was placed into an ice-water bath, then 460 mg sodium hydride (NaH, 60% in mineral oil, 11.5 mmol) was added to the stirring solution. The reaction was allowed running for 5 min in ice-water bath, then 15 mins at room temperature. TBSF (1.68 g, 12.5 mmol) was then injected into the reaction mixture at room temperature. The reaction was initiated instantly and was slightly exothermic. After 20 mins at room temperature, the resulting mixture was poured into ice-water. White solid crashed out immediately, which was collected via filtration (washed with distilled water). The solid crude product was dissolved in 30 mL ethyl acetate and dried over anhydrous sodium sulfate. After filtration, the filtrate was concentrated on evaporator. 2.3 g white solid was obtained. It was further dried *in vacuo* (2.0 torr) at 75 °C for 2 hours to give 2.19 g pure **A-1** (96% yield).

### 3, Analytical Section

#### 3-1, Spectroscopic data of catalysts

(Note: all NMR spectra of the bifluoride and poly(hydrogen fluoride) catalysts were recorded in PTFE tube at room temperature.)

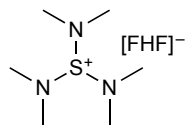

#### Tris(dimethylamino)sulfonium bifluoride (Q-5)<sup>5,8</sup>

**Q-5** was prepared following procedure 2-3-2. White solid. <sup>19</sup>F NMR (376 MHz, Acetonitrile-*d*<sub>3</sub>) δ -149.81 (m). <sup>1</sup>H NMR (400 MHz, Acetonitrile-*d*<sub>3</sub>) δ 2.88. Anal. Calcd. for C<sub>6</sub>H<sub>19</sub>F<sub>2</sub>N<sub>3</sub>S: C, 35.45; H, 9.42; N, 20.67; F, 18.69; Found: C, 35.16; H, 9.66; N, 20.91; F, 18.64.

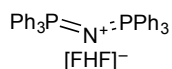

#### Bis(triphenyl-λ5-phosphanylidene)ammonium hydrogendifluoride (Q-10, PNP<sup>+</sup>[FHF]<sup>-</sup>)<sup>9</sup>

**Q-10** was prepared following procedure 2-3-1. Colorless crystalline. <sup>1</sup>H NMR (500 MHz, Acetonitrile-*d*<sub>3</sub>) δ 14.44 (br, 1H), 7.75 (t, *J* = 7.7 Hz, 6H), 7.67 (dd, *J* = 13.1, 7.7 Hz, 12H), 7.59 – 7.55 (m, 12H). <sup>19</sup>F NMR (376 MHz, Acetonitrile-*d*<sub>3</sub>) δ -163.81 (br). <sup>13</sup>C NMR (126 MHz, Acetonitrile-*d*<sub>3</sub>) δ 134.02, 132.74 – 132.58 (m), 129.89 – 129.69 (m), 127.64 (dd, *J* = 107.7, 2.6 Hz). <sup>31</sup>P NMR (162 MHz, Acetonitrile-*d*<sub>3</sub>) δ 21.72. Anal. Calcd. for C<sub>36</sub>H<sub>35</sub>F<sub>2</sub>NO<sub>2</sub>P<sub>2</sub> (PNP<sup>+</sup>[FHF]<sup>-</sup>•2H<sub>2</sub>O): C, 70.47; H, 5.75; N, 2.28; F, 6.19; Found: C, 70.21; H, 5.76; N, 2.41; F, 7.71.

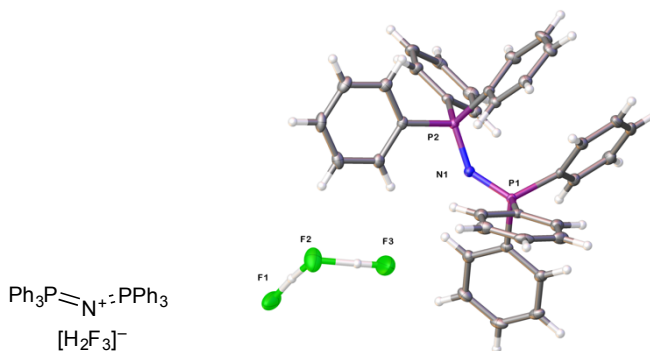

#### Bis(triphenyl-λ5-phosphanylidene)ammonium dihydrogen trifluoride (PNP<sup>+</sup>[H<sub>2</sub>F<sub>3</sub>]<sup>-</sup>)

PNP<sup>+</sup>[H<sub>2</sub>F<sub>3</sub>]<sup>-</sup> was prepared following procedure 2-3-3. Colorless crystalline (from CH<sub>2</sub>Cl<sub>2</sub>/Et<sub>2</sub>O). <sup>1</sup>H NMR (500 MHz, Acetonitrile-*d*<sub>3</sub>) δ 13.69 (br), 7.75 (t, *J* = 7.3 Hz, 6H), 7.67 (dd, *J* = 12.6, 7.8 Hz, 12H), 7.58 – 7.56 (m, 12H). <sup>13</sup>C NMR (126 MHz, Acetonitrile-*d*<sub>3</sub>) δ 134.02, 132.74 – 132.58



(m), 129.95 – 129.62 (m), 127.64 (dd,  $J = 107.7, 2.6$  Hz).  $^{19}\text{F}$  NMR (376 MHz, Acetonitrile- $d_3$ )  $\delta$  -166.69 (br).  $^{31}\text{P}$  NMR (162 MHz, Acetonitrile- $d_3$ )  $\delta$  21.97.

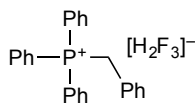

### Benzyltriphenylphosphonium hydrogendifluoride ( $[\text{PhCH}_2\text{PPh}_3]^+[\text{H}_2\text{F}_3]^-$ )<sup>10</sup>

$[\text{PhCH}_2\text{PPh}_3]^+[\text{H}_2\text{F}_3]^-$  was prepared following procedure **2-3-3**. Colorless crystalline (from MeOH/Et<sub>2</sub>O).  $^1\text{H}$  NMR (400 MHz, Chloroform- $d$ )  $\delta$  7.80 – 7.76 (m, 3H), 7.67 – 7.56 (m, 12H), 7.26 – 7.21 (m, 1H), 7.13 (t,  $J = 7.5$  Hz, 2H), 6.95 (dd,  $J = 7.9, 2.4$  Hz, 2H), 4.89 (d,  $J = 14.4$  Hz, 2H).  $^{19}\text{F}$  NMR (376 MHz, Chloroform- $d$ )  $\delta$  -167.97 (br, 3F). Anal. Calcd. for C<sub>25</sub>H<sub>24</sub>F<sub>3</sub>P: C, 72.81; H, 5.87. Found: C, 72.78; H, 6.25.

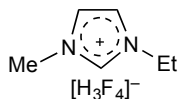

### 1-Ethyl-3-methylimidazolium trihydrogen tetrafluoride ( $\text{EMI}^+[\text{H}_3\text{F}_4]^-$ )

$\text{EMI}^+[\text{H}_3\text{F}_4]^-$  was prepared following procedure **2-3-6**. Colorless liquid.  $^1\text{H}$  NMR (500 MHz, Acetonitrile- $d_3$ )  $\delta$  11.76 (s, 3H), 8.53 (s, 1H), 7.42 (s, 1H), 7.36 (s, 1H), 4.17 (q,  $J = 7.3$  Hz, 2H), 3.83 (s, 3H), 1.45 (t,  $J = 7.3$  Hz, 3H).  $^{13}\text{C}$  NMR (126 MHz, Acetonitrile- $d_3$ )  $\delta$  137.03, 124.85, 123.18, 46.03, 36.90, 15.68.  $^{19}\text{F}$  NMR (376 MHz, Acetonitrile- $d_3$ )  $\delta$  -173.52. Anal. Calcd. for C<sub>6</sub>H<sub>15</sub>F<sub>4</sub>N<sub>2</sub>: C, 37.89; H, 7.42; N, 14.73; F, 39.96. Found: C, 37.88; H, 7.43; N, 15.09; F, 36.24, Cl (residual) < 0.1 mol%.

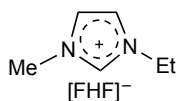

### 1-Ethyl-3-methylimidazolium hydrogendifluoride ( $\text{EMI}^+[\text{FHF}]^-$ )

$\text{EMI}^+[\text{FHF}]^-$  was prepared following procedure **2-3-6**. Waxy solid.  $^1\text{H}$  NMR (500 MHz, Acetonitrile- $d_3$ )  $\delta$  14.62 (s, 1H), 9.32 (s, 1H), 7.48 (s, 1H), 7.43 (s, 1H), 4.19 (q,  $J = 7.3$  Hz, 2H), 3.85 (s, 3H), 1.43 (t,  $J = 7.3$  Hz, 3H).  $^{13}\text{C}$  NMR (126 MHz, Methylene Chloride- $d_2$ )  $\delta$  138.42, 124.60, 122.95, 45.71, 36.67, 15.75.  $^{19}\text{F}$  NMR (376 MHz, Acetonitrile- $d_3$ )  $\delta$  -123.81. Anal. Calcd. for C<sub>6</sub>H<sub>13</sub>F<sub>2</sub>N<sub>2</sub>: C, 47.99; H, 8.05; N, 18.65; F, 25.30. Found: C, 44.06; H, 7.76; N, 17.52; F, 28.33.

### 3-2, Spectroscopic data of monomers.

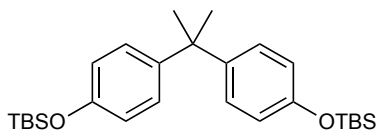

#### 4,4'-(Propane-2,2-diyl)bis(4,1-phenylene))bis(oxy)bis(tert-butyldimethylsilane) (A-1).<sup>1</sup>

**A-1** was prepared following procedure **2-1-1**. White solid (99% yield). m.p. 82-84 °C; <sup>1</sup>H NMR (500 MHz, Chloroform-*d*) δ 7.09 – 7.02 (m, 4H), 6.74 – 6.67 (m, 4H), 1.61 (s, 6H), 0.97 (s, 18H), 0.18 (s, 12H). GC-MS (EI), [M]<sup>+</sup>, m/z = 456.4.

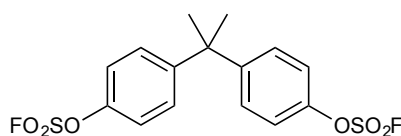

#### 4,4'-(Propane-2,2-diyl)bis(4,1-phenylene) disulfofluoridate (B-1).<sup>1</sup>

**B-1** was prepared following procedure **2-1-2**. Colorless crystalline (crystallized from Hexane, 96% yield). m.p. 51-53 °C; <sup>1</sup>H NMR (500 MHz, Chloroform-*d*) δ 7.33 – 7.23 (m, 8H), 1.70 (s, 6H). <sup>19</sup>F NMR (376 MHz, Chloroform-*d*) δ 37.27 (s, 2F). GC-MS (EI), [M]<sup>+</sup>, m/z = 392.1.

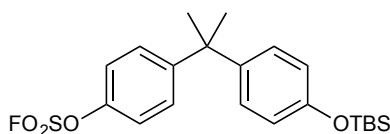

#### 4-(2-(4-((tert-butyldimethylsilyl)oxy)phenyl)propan-2-yl)benzenesulfonic hypofluorous anhydride (AB-1)

**AB-1** was prepared following procedure **2-1-3**. Colorless liquid, 15.2 g (86% yield). <sup>1</sup>H NMR (400 MHz, Chloroform-*d*) δ 7.35 – 7.30 (m, 2H), 7.27 – 7.19 (m, 2H), 7.12 – 7.03 (m, 2H), 6.82 – 6.73 (m, 2H), 1.68 (s, 6H), 1.00 (s, 9H), 0.22 (s, 6H); <sup>19</sup>F NMR (376 MHz, Chloroform-*d*) δ 37.06 (s, 1F); <sup>13</sup>C NMR (101 MHz, Chloroform-*d*) δ 153.73, 152.01, 147.92, 142.11, 128.72, 127.64, 120.14, 119.52, 42.34, 30.90, 25.67, 18.17, -4.39. GC-MS (EI), m/z = 424.2 ([M]<sup>+</sup>), 409.2, 303.2, 275.2, 195.1, 73.1.

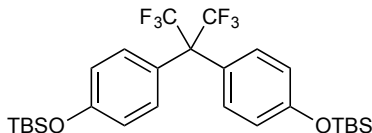

**(((perfluoropropane-2,2-diyl)bis(4,1-phenylene))bis(oxy))bis(*tert*-butyldimethylsilane) (A-2)<sup>1</sup>**

**A-2** was prepared following procedure **2-1-1**. White solid (84% yield). m.p. 164-166 °C; <sup>1</sup>H NMR (400 MHz, Chloroform-*d*) δ 7.27 (d, *J* = 8.6 Hz, 4H), 6.83 (d, *J* = 8.6 Hz, 4H), 1.01 (s, 18H), 0.25 (s, 12H). <sup>19</sup>F NMR (376 MHz, Chloroform-*d*) δ -64.39 (s, 6F). GC-MS (EI), [M]<sup>+</sup>, m/z = 564.3.

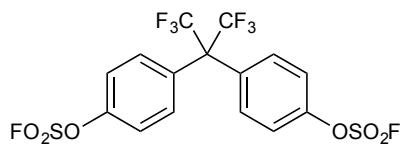

**(perfluoropropane-2,2-diyl)bis(4,1-phenylene) bis(sulfurofluoridate) (B-2)<sup>1</sup>**

**B-2** was prepared following procedure **2-1-2**. Colorless crystalline (crystallized from Hexane, 92% yield). m.p. 127-129 °C; <sup>1</sup>H NMR (500 MHz, Chloroform-*d*) δ 7.52 (d, *J* = 8.7 Hz, 4H), 7.44 – 7.39 (m, 4H). <sup>19</sup>F NMR (376 MHz, Chloroform-*d*) δ 38.44 (s, 2F), -64.05 (s, 6F). GC-MS (EI), [M]<sup>+</sup>, m/z = 500.0.

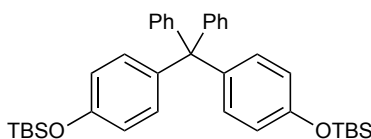

**bis(4-((*tert*-butyldimethylsilyl)oxy)phenyl)diphenylmethane (A-3)**

**A-3** was prepared following procedure **2-1-1**. White solid (94% yield). m.p. 172-174 °C; <sup>1</sup>H NMR (400 MHz, Chloroform-*d*) δ 7.23 – 7.17 (m, 4H), 7.14 – 7.11 (m, 6H), 6.97 (d, *J* = 8.7 Hz, 4H), 6.66 (d, *J* = 8.7 Hz, 4H), 0.93 (s, 18H), 0.15 (s, 12H). <sup>13</sup>C NMR (126 MHz, Chloroform-*d*) δ 153.93, 147.77, 140.20, 132.61, 131.57, 127.71, 126.20, 119.09, 64.17, 26.12, 18.62, -3.92. GC-MS (EI), m/z = 580.5 ([M]<sup>+</sup>), 503.4, 373.3, 158.2, 73.1.

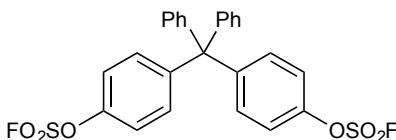

**(diphenylmethylene)bis(4,1-phenylene) bis(sulfurofluoridate) (B-3)**

**B-3** was prepared following procedure **2-1-2**. White solid (98% yield). m.p. 169-171 °C; <sup>1</sup>H NMR (500 MHz, Chloroform-*d*) δ 7.33 – 7.28 (m, 8H), 7.26 – 7.23 (m, 6H), 7.16 – 7.13 (m, 4H). <sup>19</sup>F NMR (376 MHz, Chloroform-*d*) δ 37.67 (s, 2F). <sup>13</sup>C NMR (126 MHz, Chloroform-*d*) δ 148.66, 147.34, 145.60, 133.28, 131.17, 128.50, 127.18, 120.47, 64.79. GC-MS (EI), m/z = 516.1 ([M]<sup>+</sup>), 439.1, 341.1.

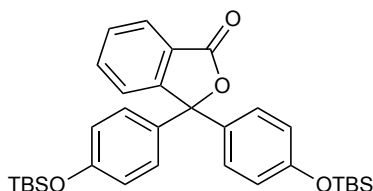

**3,3-bis(4-((*tert*-butyldimethylsilyl)oxy)phenyl)isobenzofuran-1(3*H*)-one (A-4)**

**A-4** was prepared following procedure **2-1-1**. White solid (96% yield). m.p. 123-125 °C. <sup>1</sup>H NMR (400 MHz, Chloroform-*d*) δ 7.92 (d, *J* = 7.7 Hz, 1H), 7.71 – 7.63 (m, 1H), 7.53 (t, *J* = 7.5 Hz, 2H), 7.18 (d, *J* = 8.7 Hz, 4H), 6.77 (d, *J* = 8.7 Hz, 4H), 0.97 (s, 18H), 0.19 (s, 12H). <sup>13</sup>C NMR (126 MHz, Chloroform-*d*) δ 170.28, 156.26, 153.10, 134.42, 134.07, 129.53, 128.95, 126.26, 126.04, 124.51, 120.18, 92.12, 26.05, 18.57, -3.98. GC-MS (EI), m/z = 546.4 ([M]<sup>+</sup>), 502.4, 297.2, 73.1.

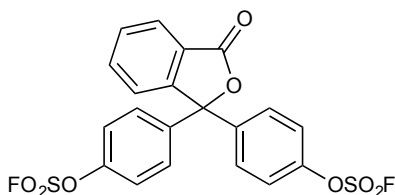

**(3-oxo-1,3-dihydroisobenzofuran-1,1-diyl)bis(4,1-phenylene) bis(sulfurofluoridate) (B-4)<sup>1</sup>**

**B-4** was prepared following procedure **2-1-2**. White solid (97% yield). m.p. 95-97 °C. <sup>1</sup>H NMR (400 MHz, Chloroform-*d*) δ 8.00 (dt, *J* = 7.7, 1.0 Hz, 1H), 7.80 (td, *J* = 7.6, 1.2 Hz, 1H), 7.66 (td, *J* = 7.5, 1.0 Hz, 1H), 7.61 (dd, *J* = 7.8, 1.0 Hz, 1H), 7.49 (d, *J* = 8.9 Hz, 4H), 7.39 – 7.35 (m, 4H). <sup>19</sup>F NMR (376 MHz, Chloroform-*d*) δ 37.99 (s, 2F). GC-MS (EI), m/z = 482.1 ([M]<sup>+</sup>), 339.1, 307.1, 104.1.

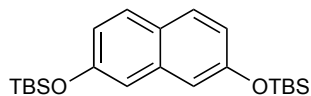

**2,7-bis((*tert*-butyldimethylsilyl)oxy)naphthalene (A-5)**

**A-5** was prepared following procedure **2-1-1**. White solid (92% yield). m.p. 56-58 °C. <sup>1</sup>H NMR (400 MHz, Chloroform-*d*) δ 7.66 (d, *J* = 8.8 Hz, 2H), 7.08 (d, *J* = 2.3 Hz, 2H), 6.96 (dd, *J* = 8.8,

2.3 Hz, 2H), 1.06 (d,  $J=0.9$  Hz, 18H), 0.28 (s, 12H).  $^{13}\text{C}$  NMR (126 MHz, Chloroform- $d$ )  $\delta$  154.31, 136.49, 129.45, 125.55, 120.26, 114.32, 26.19, 18.70, -3.86. GC-MS (EI),  $m/z = 388.3$  ( $[\text{M}]^+$ ).

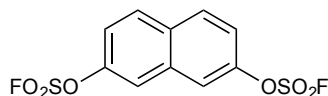

#### Naphthalene-2,7-diyl bis(sulfurofluoridate) (B-5)<sup>1</sup>

**B-5** was prepared following procedure **2-1-2**. White solid (93% yield). m.p. 121-123 °C.  $^1\text{H}$  NMR (400 MHz, Chloroform- $d$ )  $\delta$  8.06 (d,  $J = 8.9$  Hz, 2H), 7.91 (d,  $J = 2.1$  Hz, 2H), 7.57 (dd,  $J = 8.9$ , 2.1 Hz, 2H).  $^{19}\text{F}$  NMR (376 MHz, Chloroform- $d$ )  $\delta$  38.19 (s, 2F). GC-MS (EI),  $m/z = 324.0$  ( $[\text{M}]^+$ ), 213.1, 130.2, 102.1.

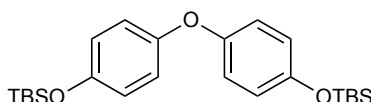

#### ((oxybis(4,1-phenylene))bis(oxy))bis(*tert*-butyldimethylsilane) (A-6)<sup>1</sup>

**A-6** was prepared following procedure **2-1-1**. Colorless liquid (98% yield).  $^1\text{H}$  NMR (500 MHz, Chloroform- $d$ )  $\delta$  6.88 – 6.80 (m, 4H), 6.80 – 6.73 (m, 4H), 0.98 (s, 18H), 0.18 (s, 12H). GC-MS (EI),  $m/z = 430.3$  ( $[\text{M}]^+$ ), 181.1, 73.1.

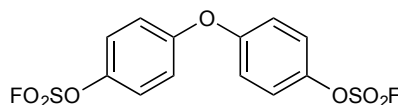

#### oxybis(4,1-phenylene) bis(sulfurofluoridate) (B-6)<sup>1</sup>

**B-6** was prepared following procedure **2-1-2**. White solid (91% yield). m.p. 53-55 °C.  $^1\text{H}$  NMR (400 MHz, Chloroform- $d$ )  $\delta$  7.35 (d,  $J = 8.1$  Hz, 4H), 7.10 (d,  $J = 8.1$  Hz, 4H).  $^{19}\text{F}$  NMR (376 MHz, Chloroform- $d$ )  $\delta$  36.93 (s, 2F). GC-MS (EI),  $m/z = 366.0$  ( $[\text{M}]^+$ ), 283.1, 200.1, 64.1.

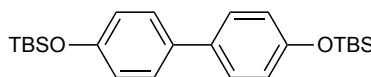

#### 4,4'-bis((*tert*-butyldimethylsilyl)oxy)-1,1'-biphenyl (A-7)

**A-7** was prepared following procedure **2-1-1**. White solid (95% yield). m.p. 64-66 °C.  $^1\text{H}$  NMR (400 MHz, Chloroform- $d$ )  $\delta$  7.44 (d,  $J = 8.3$  Hz, 4H), 6.91 (d,  $J = 8.3$  Hz, 4H), 1.04 (s, 18H), 0.26 (s, 12H).  $^{13}\text{C}$  NMR (126 MHz, Chloroform- $d$ )  $\delta$  155.23, 134.54, 128.11, 120.74, 26.22, 18.72, -3.89. GC-MS (EI),  $m/z = 414.3$  ( $[\text{M}]^+$ ), 357.2, 150.2, 73.1.

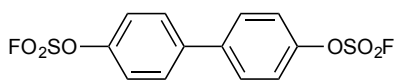

**[1,1'-biphenyl]-4,4'-diyl bis(sulfurofluoridate) (B-7)**

**B-7** was prepared following procedure **2-1-2**. White solid (98% yield). m.p. 97-99 °C.  $^1\text{H}$  NMR (400 MHz, Chloroform-*d*)  $\delta$  7.67 (d,  $J = 8.6$  Hz, 4H), 7.48 (d,  $J = 8.6$  Hz, 4H).  $^{19}\text{F}$  NMR (376 MHz, Chloroform-*d*)  $\delta$  37.68.  $^{13}\text{C}$  NMR (126 MHz, Chloroform-*d*)  $\delta$  150.30, 140.39, 129.62, 121.92. GC-MS (EI),  $m/z = 350.0$  ( $[\text{M}]^+$ ), 267.1, 156.1, 128.2.

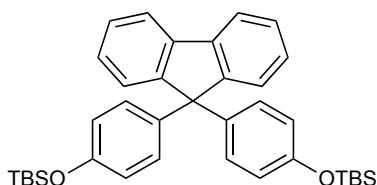

**((9H-fluorene-9,9-diyl)bis(4,1-phenylene))bis(oxy))bis(tert-butyl dimethylsilane) (A-8)**

**A-8** was prepared following procedure **2-1-1**. White solid (89% yield), m.p. 209-211 °C.  $^1\text{H}$  NMR (400 MHz, Chloroform-*d*)  $\delta$  7.77 (d,  $J = 7.1$  Hz, 2H), 7.41 (d,  $J = 7.5$  Hz, 2H), 7.36 (t,  $J = 7.4$  Hz, 2H), 7.28 (t,  $J = 7.4$  Hz, 2H), 7.07 (d,  $J = 8.5$  Hz, 4H), 6.70 (d,  $J = 8.5$  Hz, 4H), 0.98 (s, 18H), 0.19 (s, 12H).  $^{13}\text{C}$  NMR (126 MHz, Chloroform-*d*)  $\delta$  154.67, 152.36, 140.38, 139.05, 129.57, 127.98, 127.64, 126.59, 120.46, 119.82, 64.71, 26.08, 18.55, -3.96. GC-MS (EI),  $m/z = 578.4$  ( $[\text{M}]^+$ ), 371.3, 329.2, 157.2, 73.1.

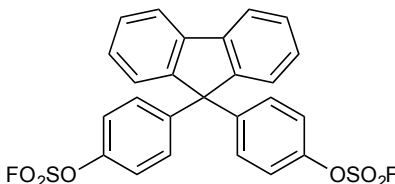

**(9H-fluorene-9,9-diyl)bis(4,1-phenylene) bis(sulfurofluoridate) (B-8)**

**B-8** was prepared following procedure **2-1-2**. White solid (96% yield). m.p. 246-248 °C.  $^1\text{H}$  NMR (500 MHz, Chloroform-*d*)  $\delta$  7.80 (d,  $J = 7.6$  Hz, 2H), 7.42 (td,  $J = 7.6, 7.0, 2.2$  Hz, 2H), 7.34 – 7.30 (m, 4H), 7.27 – 7.26 (m, 4H), 7.21 (d,  $J = 8.8$  Hz, 4H).  $^{19}\text{F}$  NMR (376 MHz, Chloroform-*d*)  $\delta$  37.47 (s, 2F).  $^{13}\text{C}$  NMR (126 MHz, Chloroform-*d*)  $\delta$  149.95, 149.34, 146.49, 140.46, 130.36, 128.78, 128.68, 126.26, 121.27, 121.07, 64.89. GC-MS (EI),  $m/z = 514.1$  ( $[\text{M}]^+$ ), 431.2, 151.1.

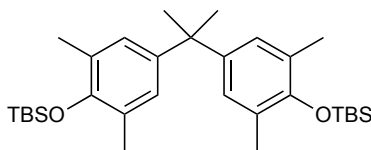

**((propane-2,2-diylbis(2,6-dimethyl-4,1-phenylene))bis(oxy))bis(*tert*-butyldimethylsilane) (A-9)**

**A-9** was prepared following procedure **2-1-1**, purified by flash column chromatography (Hexane/EtOAc = 10:1). White solid (81% yield). m.p. 93-95 °C. <sup>1</sup>H NMR (400 MHz, Chloroform-*d*) δ 6.83 (s, 4H), 2.20 (s, 12H), 1.62 (s, 6H), 1.06 (s, 18H), 0.22 (s, 12H). <sup>13</sup>C NMR (126 MHz, Chloroform-*d*) δ 150.08, 144.01, 127.84, 127.60, 41.77, 31.56, 26.61, 19.22, 18.53, -2.42. GC-MS (EI), *m/z* = 512.4 ([M]<sup>+</sup>), 497.4, 235.2, 73.1.

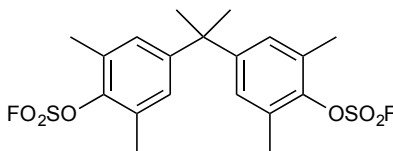

**Propane-2,2-diylbis(2,6-dimethyl-4,1-phenylene) bis(sulfurofluoridate) (B-9)**

**B-9** was prepared following procedure **2-1-2**, purified by flash column chromatography (Hexane/EtOAc = 10:1). White solid (82% yield). m.p. 92-94 °C. <sup>1</sup>H NMR (500 MHz, Chloroform-*d*) δ 6.92 (s, 2H), 2.34 (s, 12H), 1.62 (s, 6H). <sup>19</sup>F NMR (376 MHz, Chloroform-*d*) δ 42.94 (s, 2F). <sup>13</sup>C NMR (126 MHz, Chloroform-*d*) δ 150.26, 147.34, 130.80, 128.56, 42.76, 31.11, 17.16 (d, *J* = 2.8 Hz). GC-MS (EI), *m/z* = 448.1 ([M]<sup>+</sup>), 433.1, 229.0.

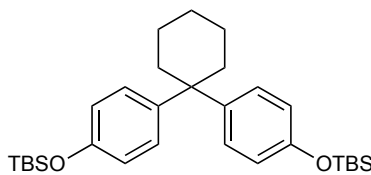

**((cyclohexane-1,1-diylbis(4,1-phenylene))bis(oxy))bis(*tert*-butyldimethylsilane) (A-10)**

**A-10** was prepared following procedure **2-1-1**. White solid (94% yield), m.p. 72-74 °C. <sup>1</sup>H NMR (400 MHz, Chloroform-*d*) δ 7.12 (d, *J* = 8.6 Hz, 4H), 6.76 (d, *J* = 8.6 Hz, 4H), 2.23 – 2.20 (m, 4H), 1.60 – 1.49 (m, 6H), 1.01 (s, 18H), 0.22 (s, 12H). <sup>13</sup>C NMR (126 MHz, Chloroform-*d*) δ 153.43, 142.03, 128.51, 119.81, 45.62, 37.95, 26.94, 26.13, 23.40, 18.59, -3.94. GC-MS (EI), *m/z* = 496.4 ([M]<sup>+</sup>), 453.3, 73.1.

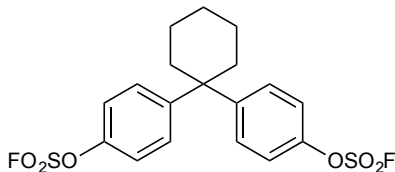

**Cyclohexane-1,1-diylbis(4,1-phenylene) bis(sulfurofluoridate) (B-10)**

**B-10** was prepared following procedure **2-1-2**. White solid (97% yield). m.p. 91-93 °C. <sup>1</sup>H NMR (500 MHz, Chloroform-*d*) δ 7.36 – 7.33 (m, 4H), 7.26 – 7.24 (m, 4H), 2.29 – 2.26 (m, 4H), 1.56 – 1.52 (m, 6H). <sup>19</sup>F NMR (376 MHz, Chloroform-*d*) δ 37.29 (s, 2F). <sup>13</sup>C NMR (126 MHz, Chloroform-*d*) δ 148.89, 148.40, 129.52, 121.13, 46.49, 37.56, 26.39, 23.03. GC-MS (EI), m/z = 432.1 ([M]<sup>+</sup>), 376.0, 189.0.

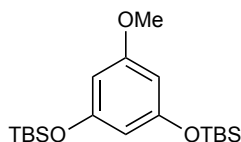

**((5-methoxy-1,3-phenylene)bis(oxy))bis(*tert*-butyldimethylsilane) (A-11)**

**A-11** was prepared following procedure **2-1-1**, purified by flash column chromatography (Hexane/EtOAc = 5:1). White solid (61% yield). m.p. 36-37 °C. <sup>1</sup>H NMR (500 MHz, Chloroform-*d*) δ 6.05 (d, *J* = 1.9 Hz, 2H), 5.97 (t, *J* = 1.9 Hz, 1H), 3.73 (s, 3H), 0.97 (s, 18H), 0.19 (s, 12H). <sup>13</sup>C NMR (126 MHz, Chloroform-*d*) δ 161.49, 157.55, 105.39, 100.22, 55.59, 26.10, 18.63, -3.99. GC-MS (EI), m/z = 368.2 ([M]<sup>+</sup>), 311.2, 269.0, 73.1.

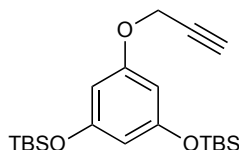

**((5-(prop-2-yn-1-yloxy)-1,3-phenylene)bis(oxy))bis(*tert*-butyldimethylsilane) (A-12)**

**A-12** was prepared following procedure **2-1-1**, purified by flash column chromatography (Hexane/EtOAc = 10:1). Colorless oil (94% yield). <sup>1</sup>H NMR (400 MHz, Chloroform-*d*) δ 6.12 (d, *J* = 2.1 Hz, 2H), 6.00 (t, *J* = 2.1 Hz, 1H), 4.60 (d, *J* = 2.4 Hz, 2H), 2.52 (t, *J* = 2.4 Hz, 1H), 0.97 (s, 18H), 0.19 (s, 12H). <sup>13</sup>C NMR (126 MHz, Chloroform-*d*) δ 159.41, 157.54, 106.29, 101.14, 79.02, 75.86, 56.24, 26.10, 18.63, -4.00. GC-MS (EI), m/z = 392.2 ([M]<sup>+</sup>), 335.2, 73.1.



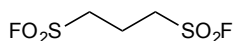

### Propane-1,3-disulfonyl difluoride (B-13)

**B-13** was prepared following procedure **2-1-5**. Crystalline solid from Hexane/EtOAc (73% yield for the fluorination step). m.p. 33-34 °C. <sup>1</sup>H NMR (400 MHz, Chloroform-*d*) δ 3.66 (q, *J* = 6.7 Hz, 4H), 2.61 (p, *J* = 6.7 Hz, 2H). <sup>19</sup>F NMR (376 MHz, Chloroform-*d*) δ 54.52 (s, 2F). <sup>13</sup>C NMR (126 MHz, Chloroform-*d*) δ 48.46 (d, *J* = 19.1 Hz), 18.63.

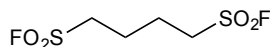

### butane-1,4-disulfonyl difluoride (B-14)

**B-14** was prepared following procedure **2-1-5**. Crystalline solid from Hexane/EtOAc (80% yield for the fluorination step). <sup>1</sup>H NMR (500 MHz, Chloroform-*d*) δ 3.62 – 3.10 (m, 4H), 2.19 (m, 4H). <sup>19</sup>F NMR (376 MHz, Chloroform-*d*) δ 54.56 (s, 2F). <sup>13</sup>C NMR (126 MHz, Chloroform-*d*) δ 50.23 (d, *J* = 17.8 Hz), 22.27.

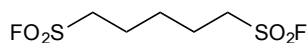

### Pentane-1,5-disulfonyl difluoride (B-15)

**B-15** was prepared following procedure **2-1-5**. Crystalline solid from Hexane/EtOAc (92% yield for the fluorination step). m.p. 29-31 °C. <sup>1</sup>H NMR (500 MHz, Chloroform-*d*) δ 3.41 (td, *J* = 7.5, 4.1 Hz, 4H), 2.03 (dd, *J* = 7.5, 8.0 Hz, 4H), 1.73 (p, *J* = 8.0 Hz, 2H). <sup>19</sup>F NMR (376 MHz, Chloroform-*d*) δ 53.94 (s, 2F). <sup>13</sup>C NMR (126 MHz, Chloroform-*d*) δ 50.58 (d, *J* = 17.1 Hz), 26.27, 23.20.

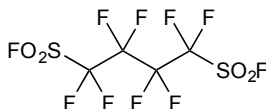

### 1,1,2,2,3,3,4,4-octafluorobutane-1,4-disulfonyl difluoride (B-16)<sup>4</sup>

**B-16** was prepared following procedure **2-1-6**. Colorless oil (27% yield at the fluorination step, challenging to isolate due to its low boil point). <sup>19</sup>F NMR (376 MHz, Chloroform-*d*) δ 47.08 (2F), -108.03 (4F), -119.98 (4F).

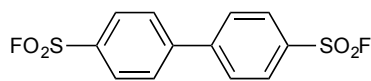

### [1,1'-biphenyl]-4,4'-disulfonyl difluoride (B-17)<sup>4</sup>

**B-17** was prepared following procedure **2-1-4**. White solid (79% yield). m.p. 193-195 °C. <sup>1</sup>H NMR (400 MHz, Chloroform-*d*) δ 8.18 (d, *J* = 8.0 Hz, 4H), 7.91 (d, *J* = 8.0 Hz, 4H). <sup>19</sup>F NMR (376 MHz, Chloroform-*d*) δ 66.09 (s, 2F). GC-MS (EI), *m/z* = 318.0 ([M]<sup>+</sup>), 251.1, 223.1, 152.2, 51.1.

### 3-3, Spectroscopic data of polymers

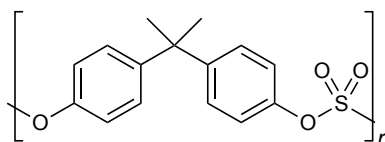

Polysulfate **P-1**,<sup>1</sup> prepared following the procedure described in Section **2-2-1** (2.0 mmol scale, 1.04 g). White fiber. <sup>1</sup>H NMR (500 MHz, Methylene Chloride-*d*<sub>2</sub>) δ 7.28 (d, *J* = 8.9 Hz, 1H), 7.23 (d, *J* = 8.9 Hz, 1H), 1.68 (s, 2H). *M<sub>n</sub><sup>PS</sup>* = 92 kDa. PDI = 1.7. *T<sub>g</sub>* (DSC) = 97.2 °C. *T<sub>d</sub>* (5% weight loss, TGA) = 370.3 °C.

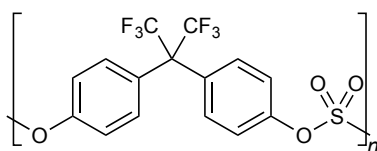

Polysulfate **P-2**,<sup>1</sup> prepared following the procedure described in Section **2-2-1** (2.0 mmol scale, 1.51 g). <sup>1</sup>H NMR (500 MHz, DMF-*d*<sub>7</sub>) δ 7.85 – 7.80 (m, 4H), 7.76 – 7.72 (m, 4H); <sup>19</sup>F NMR (376 MHz, DMF-*d*<sub>7</sub>) δ -63.85; <sup>13</sup>C NMR (126 MHz, DMF-*d*<sub>7</sub>) δ 151.31, 132.93, 132.64, 124.47 (q, *J* = 285.4 Hz), 122.16. *M<sub>n</sub><sup>PS</sup>* = 84 kDa. PDI = 1.6. *T<sub>g</sub>* (DSC) = 106.8 °C. *T<sub>d</sub>* (5% weight loss, TGA) = 397.7 °C.

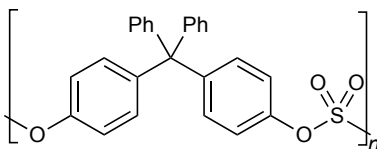

Polysulfate **P-3**, prepared following the procedure described in Section **2-2-1** (2.0 mmol scale, 1.70 g). <sup>1</sup>H NMR (500 MHz, Methylene Chloride-*d*<sub>2</sub>) δ 7.38 – 7.31 (m, 8H), 7.29 – 7.25 (d, *J* = 8.8 Hz, 10H). <sup>13</sup>C NMR (126 MHz, DMF-*d*<sub>7</sub>) δ 148.90, 146.84, 146.41, 133.11, 131.01, 128.60, 126.97, 121.07, 64.86. *M<sub>n</sub><sup>PS</sup>* = 37 kDa. PDI = 1.5. *T<sub>g</sub>* (DSC) = 158.2 °C. *T<sub>d</sub>* (5% weight loss, TGA) = 340.7 °C.

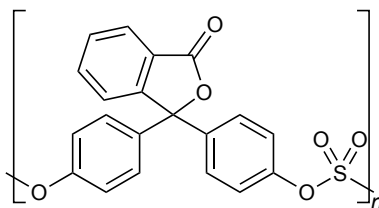

Polysulfate **P-4**, prepared following the procedure described in Section 2-2-1 (2.0 mmol scale, 1.56 g, the stereochemistry was not determined).  $^1\text{H}$  NMR (500 MHz, Methylene Chloride- $d_2$ )  $\delta$  8.03 (d,  $J = 7.6$  Hz, 1H), 7.84 (t,  $J = 7.5$  Hz, 1H), 7.71 (t,  $J = 7.5$  Hz, 1H), 7.67 (d,  $J = 7.8$  Hz, 1H), 7.50 (d,  $J = 8.7$  Hz, 4H), 7.39 (d,  $J = 8.6$  Hz, 4H).  $^{13}\text{C}$  NMR (126 MHz, Methylene Chloride- $d_2$ )  $\delta$  168.99, 150.96, 150.72, 140.57, 135.14, 130.47, 129.38, 126.63, 125.62, 124.40, 121.62, 90.15.  $M_n^{ps} = 37$  kDa. PDI = 1.6.  $T_g$  (DSC) = 199.5  $^\circ\text{C}$ .  $T_d$  (5% weight loss, TGA) = 395.5  $^\circ\text{C}$ .

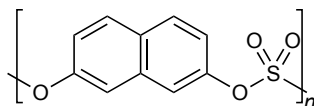

Polysulfate **P-5**,<sup>1</sup> prepared following the procedure described in Section 2-2-1 (2.0 mmol scale, 892 mg).  $^1\text{H}$  NMR (500 MHz, DMF- $d_7$ )  $\delta$  8.53 (d,  $J = 2.1$  Hz, 2H), 8.38 (d,  $J = 9.1$  Hz, 2H), 7.88 (dd,  $J = 9.1, 2.1$  Hz, 2H).  $^{13}\text{C}$  NMR (126 MHz, DMF- $d_7$ )  $\delta$  149.50, 134.61, 131.60, 131.51, 121.56, 119.73.  $M_n^{ps} = 64$  kDa. PDI = 1.7.  $T_g$  (DSC) = 100.4  $^\circ\text{C}$ .  $T_d$  (5% weight loss, TGA) = 356.6  $^\circ\text{C}$ .

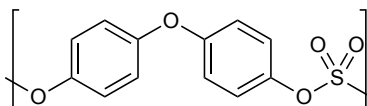

Polysulfate **P-6**,<sup>1</sup> prepared following the procedure described in Section 2-2-1 (2.0 mmol scale, 1.03 g).  $^1\text{H}$  NMR (500 MHz, DMSO- $d_6$ )  $\delta$  7.50 (d,  $J = 9.0$  Hz, 4H), 7.20 (d,  $J = 9.0$  Hz, 4H).  $^{13}\text{C}$  NMR (126 MHz, DMSO- $d_6$ )  $\delta$  155.37, 145.47, 122.99, 120.35.  $M_n^{ps} = 48$  kDa. PDI = 2.1.  $T_d$  (5% weight loss, TGA) = 343.1  $^\circ\text{C}$ .

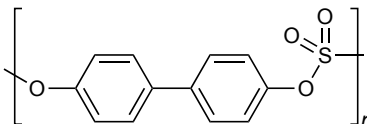

Polysulfate **P-7**, prepared following the procedure described in Section 2-2-1 (2.0 mmol scale, 987 mg).  $^1\text{H}$  NMR (500 MHz, DMF- $d_7$ )  $\delta$  8.05 (d,  $J = 8.7$  Hz, 4H), 7.76 (d,  $J = 8.7$  Hz, 4H).  $^{13}\text{C}$  NMR (126 MHz, DMF- $d_7$ )  $\delta$  150.69, 139.47, 129.64, 122.25.  $M_n^{ps} = 79$  kDa. PDI = 1.7.  $T_g$  (DSC) = 120.4  $^\circ\text{C}$ .  $T_d$  (5% weight loss, TGA) = 350.9  $^\circ\text{C}$ .

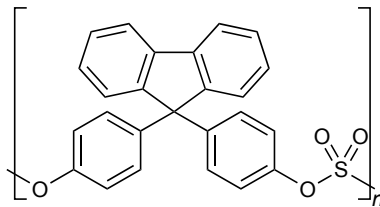

Polysulfate **P-8a**, prepared following the procedure described in Section 2-2-1 (2.0 mmol scale, 1.80 g).  $^1\text{H}$  NMR (500 MHz,  $\text{DMF-}d_7$ )  $\delta$  8.07 (d,  $J = 7.6$  Hz, 1H), 7.57 (d,  $J = 7.6$  Hz, 1H), 7.50 (t,  $J = 7.4$  Hz, 1H), 7.43 – 7.36 (m, 5H).  $^{13}\text{C}$  NMR (126 MHz,  $\text{DMF-}d_7$ )  $\delta$  150.48, 149.69, 146.01, 140.42, 130.28, 128.76, 128.72, 126.54, 121.74, 121.27, 65.00.  $M_n^{ps} = 52$  kDa. PDI = 1.4.  $T_d$  (5% weight loss, TGA) = 353.5  $^\circ\text{C}$ .

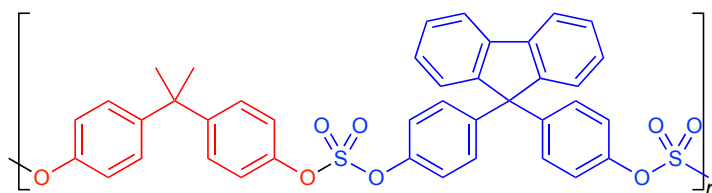

Polysulfate **P-8b**, prepared following the procedure described in Section 2-2-1 (2.0 mmol scale, 1.63 g).  $^1\text{H}$  NMR (400 MHz, Methylene Chloride- $d_2$ )  $\delta$  7.82 (d,  $J = 7.3$  Hz, 2H), 7.43 – 7.12 (m, 22H), 1.68 – 1.66 (m, 6H).  $^{13}\text{C}$  NMR (126 MHz,  $\text{DMF-}d_7$ )  $\delta$  150.50, 150.42, 149.75, 148.88, 146.03, 140.46, 130.34, 130.29, 129.18, 128.78, 126.59, 121.74, 121.31, 121.23, 65.04, 43.04, 30.52.  $M_n^{ps} = 74$  kDa. PDI = 1.6.  $T_d$  (5% weight loss, TGA) = 374.6  $^\circ\text{C}$ .

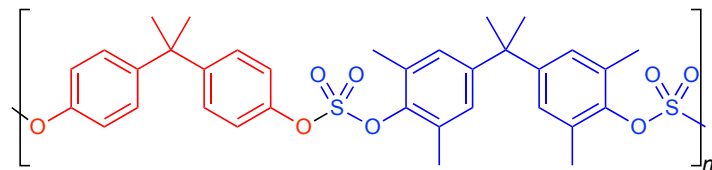

Polysulfate **P-9**, prepared following the procedure described in Section 2-2-1 (2.0 mmol scale, 1.28 g).  $^1\text{H}$  NMR (500 MHz, Methylene Chloride- $d_2$ )  $\delta$  7.41 – 7.35 (m, 8H), 7.11 – 7.08 (m, 4H), 2.45 – 2.40 (m, 12H), 1.81 (s, 6H), 1.74 (s, 6H).  $^{13}\text{C}$  NMR (126 MHz, Methylene Chloride- $d_2$ )  $\delta$  150.15, 149.71, 148.95, 146.99, 131.45, 128.76, 128.30, 121.33, 43.13, 42.56, 30.90, 30.87, 17.35.  $M_n^{ps} = 57$  kDa. PDI = 1.7.  $T_g$  (DSC) = 116.1  $^\circ\text{C}$ .  $T_d$  (5% weight loss, TGA) = 319.8  $^\circ\text{C}$ .

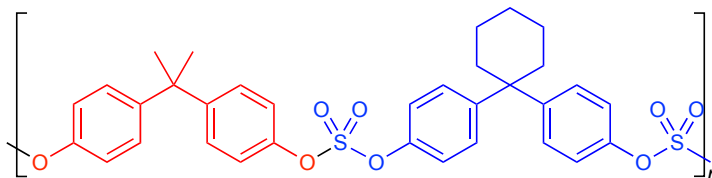

Polysulfate **P-10**, prepared following the procedure described in Section 2-2-1 (2.0 mmol scale, 1.18 g).  $^1\text{H}$  NMR (500 MHz, Methylene Chloride- $d_2$ )  $\delta$  7.43 – 7.41 (m, 4H), 7.39 – 7.28 (m, 12H),

2.37 (br, 4H), 1.77 (s, 6H), 1.66 – 1.57 (m, 6H).  $^{13}\text{C}$  NMR (126 MHz, Methylene Chloride- $d_2$ )  $\delta$  150.08, 148.87, 148.62, 148.13, 129.18, 128.82, 121.17, 120.97, 46.28, 43.09, 37.42, 30.87, 26.44, 23.11.  $M_n^{ps}$  = 94 kDa. PDI = 1.7.  $T_g$  (DSC) = 108.4 °C;  $T_d$  (5% weight loss, TGA) = 365.66 °C.

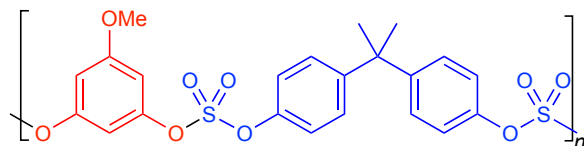

Polysulfate **P-11a**, prepared following the procedure described in Section 2-2-1 (2.0 mmol scale, 0.5 mol% **Q-5** was used as catalyst, 772 mg).  $^1\text{H}$  NMR (500 MHz, Methylene Chloride- $d_2$ )  $\delta$  7.38 (d,  $J$  = 8.8 Hz, 4H), 7.32 (d,  $J$  = 8.8 Hz, 4H), 7.05 (d,  $J$  = 2.0 Hz, 1H), 6.95 (d,  $J$  = 2.0 Hz, 2H), 3.88 (s, 3H), 1.76 (s, 6H).  $^{13}\text{C}$  NMR (126 MHz, Methylene Chloride- $d_2$ )  $\delta$  161.88, 151.48, 150.32, 148.72, 128.95, 120.97, 107.02, 106.85, 56.58, 43.14, 30.86.  $M_n^{ps}$  = 33 kDa. PDI = 1.5.  $T_g$  (DSC) = 72.6 °C.  $T_d$  (5% weight loss, TGA) = 213.2 °C.

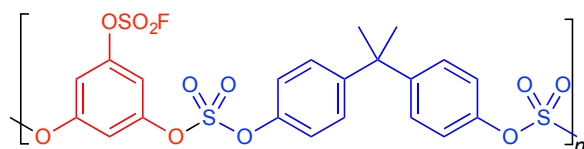

Polysulfate **P-11b**, prepared following the procedure described in Section 2-7 (1.0 mmol scale, 311 mg, 55% yield).  $^1\text{H}$  NMR (400 MHz, Methylene Chloride- $d_2$ )  $\delta$  7.56 – 7.19 (m, 11H), 1.71 (s, 6H).  $^{19}\text{F}$  NMR (376 MHz, Methylene Chloride- $d_2$ )  $\delta$  38.76 (s, 1F).  $^{13}\text{C}$  NMR (126 MHz, Methylene Chloride- $d_2$ )  $\delta$  151.34, 150.59, 150.23, 148.59, 129.11, 120.87, 115.72, 114.47, 43.20, 30.82.  $M_n^{ps}$  = 38 kDa. PDI = 1.9.  $T_d$  (5% weight loss, TGA) = 282.4 °C.

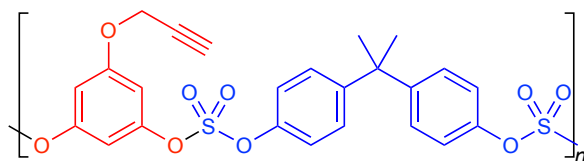

Polysulfate **P-12**, prepared following the procedure described in Section 2-2-1 (2.0 mmol scale, 5.0 mol% of **Q-5** was used as catalyst, 578 mg).  $^1\text{H}$  NMR (500 MHz, Methylene Chloride- $d_2$ )  $\delta$  7.37 – 7.33 (m, 8H), 7.14 – 7.04 (m, 3H), 4.80 (s, 2H), 2.70 (m, 1H), 1.77 (s, 6H).  $M_n^{ps}$  = 16 kDa. PDI = 1.3.

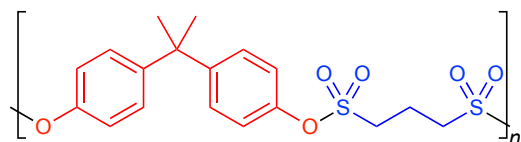

Polysulfonate **P-13**, prepared following the procedure described in Section 2-2-1 (2.0 mmol scale, 5.0 mol% of **Q-5** was used as catalyst, 615 mg).  $^1\text{H}$  NMR (500 MHz, Methylene Chloride- $d_2$ )  $\delta$  7.36 (d,  $J = 8.7$  Hz, 4H), 7.26 (d,  $J = 8.7$  Hz, 4H), 3.60 (t,  $J = 7.1$  Hz, 4H), 2.68 (p,  $J = 7.3$  Hz, 2H), 1.76 (s, 6H).  $^{13}\text{C}$  NMR (126 MHz, Methylene Chloride- $d_2$ )  $\delta$  149.95, 147.31, 128.86, 121.93, 48.51, 43.05, 30.89, 19.00.  $M_n^{PS} = 23$  kDa. PDI = 1.3.  $T_g$  (DSC) = 85.9  $^\circ\text{C}$ .  $T_d$  (5% weight loss, TGA) = 298.2  $^\circ\text{C}$ .

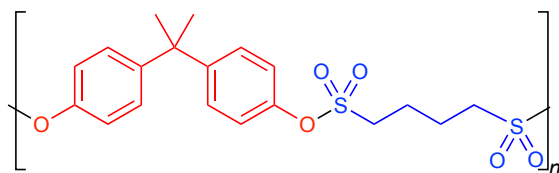

Polysulfonate **P-14**, prepared following the procedure described in Section 2-2-1 (2.0 mmol scale, 5.0 mol% of **Q-5** was used as catalyst, 583 mg).  $^1\text{H}$  NMR (500 MHz, Methylene Chloride- $d_2$ )  $\delta$  7.37 (d,  $J = 8.5$  Hz, 4H), 7.26 (d,  $J = 8.5$  Hz, 4H), 3.41 (m, 4H), 2.24 (m, 4H), 1.77 (s, 6H).  $^{13}\text{C}$  NMR (126 MHz, Methylene Chloride- $d_2$ )  $\delta$  149.81, 147.40, 128.79, 121.93, 49.93, 43.02, 30.89, 22.63.  $M_n^{PS} = 13$  kDa. PDI = 1.2.  $T_g$  (DSC) = 85.9  $^\circ\text{C}$ .  $T_d$  (5% weight loss, TGA) = 303.8  $^\circ\text{C}$ .

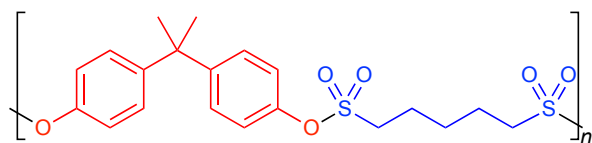

Polysulfonate **P-15**, prepared following the procedure described in Section 2-2-1 (2.0 mmol scale, 5.0 mol% **Q-5** was used as catalyst, 709 mg).  $^1\text{H}$  NMR (500 MHz, Methylene Chloride- $d_2$ )  $\delta$  7.38 (d,  $J = 8.5$  Hz, 4H), 7.27 (d,  $J = 8.5$  Hz, 4H), 3.38 (t,  $J = 7.5$  Hz, 4H), 2.10 (tt,  $J = 7.5, 7.6$  Hz, 4H), 1.78 (m, 8H).  $^{13}\text{C}$  NMR (126 MHz, Methylene Chloride- $d_2$ )  $\delta$  149.74, 147.49, 128.76, 121.96, 50.32, 43.02, 30.91, 26.95, 23.53.  $M_n^{PS} = 23$  Da. PDI = 1.4.  $T_d$  (5% weight loss, TGA) = 204.7  $^\circ\text{C}$ .  $T_d$  (21% weight loss, TGA) = 352.7  $^\circ\text{C}$ .

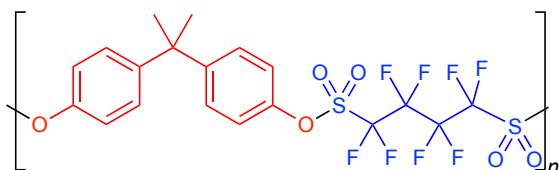

Polysulfonate **P-16**, prepared following the procedure described in Section 2-2-1 (2.0 mmol scale, 5.0 mol% **Q-5** was used as catalyst, 811 mg).  $^1\text{H}$  NMR (500 MHz, Methylene Chloride- $d_2$ )  $\delta$  7.40 (d,  $J = 8.4$  Hz, 4H), 7.31 (d,  $J = 8.4$  Hz, 4H), 1.79 (s, 6H).  $^{19}\text{F}$  NMR (376 MHz, Methylene

Chloride- $d_2$ )  $\delta$  -109.24 (s, 4F), -120.10 (s, 4F).  $^{13}\text{C}$  NMR (126 MHz, Methylene Chloride- $d_2$ )  $\delta$  150.75, 148.38, 129.05, 121.34, 115.20 (d,  $J$  = 304.8 Hz), 110.9 (d,  $J$  = 273.1 Hz), 43.23, 30.81.  $M_n^{PS}$  = 23 kDa. PDI = 1.3.  $T_d$  (5% weight loss, TGA) = 306.8 °C.

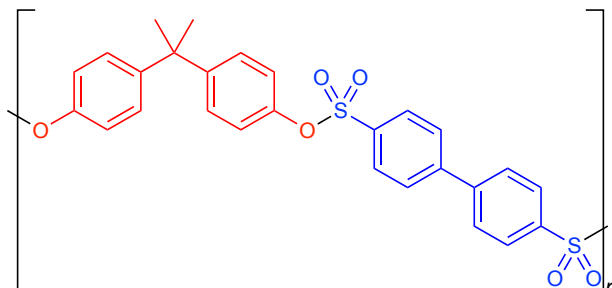

Polysulfonate **P-17**, prepared following the procedure described in Section 2-2-1 (2.0 mmol scale, 0.5 mol% **Q-5** was used as catalyst, 974 mg).  $^1\text{H}$  NMR (500 MHz, Methylene Chloride- $d_2$ )  $\delta$  8.02 (d,  $J$  = 8.4 Hz, 1H), 7.87 (d,  $J$  = 8.4 Hz, 1H), 7.23 (d,  $J$  = 8.8 Hz, 1H), 7.02 (d,  $J$  = 8.8 Hz, 1H).  $^{13}\text{C}$  NMR (126 MHz, Methylene Chloride- $d_2$ )  $\delta$  149.77, 147.86, 145.05, 135.97, 129.50, 128.60, 128.50, 122.13, 42.95, 30.80.  $M_n^{PS}$  = 64578 Da. PDI = 1.5.  $T_g$  (DSC) = 176.2 °C;  $T_d$  (5% weight loss, TGA) = 392.8 °C.

### 3-4, Copies of the NMR spectra of new compounds

$^1\text{H NMR}$  ( $\text{PNP}^+[\text{FHF}]^-$ )

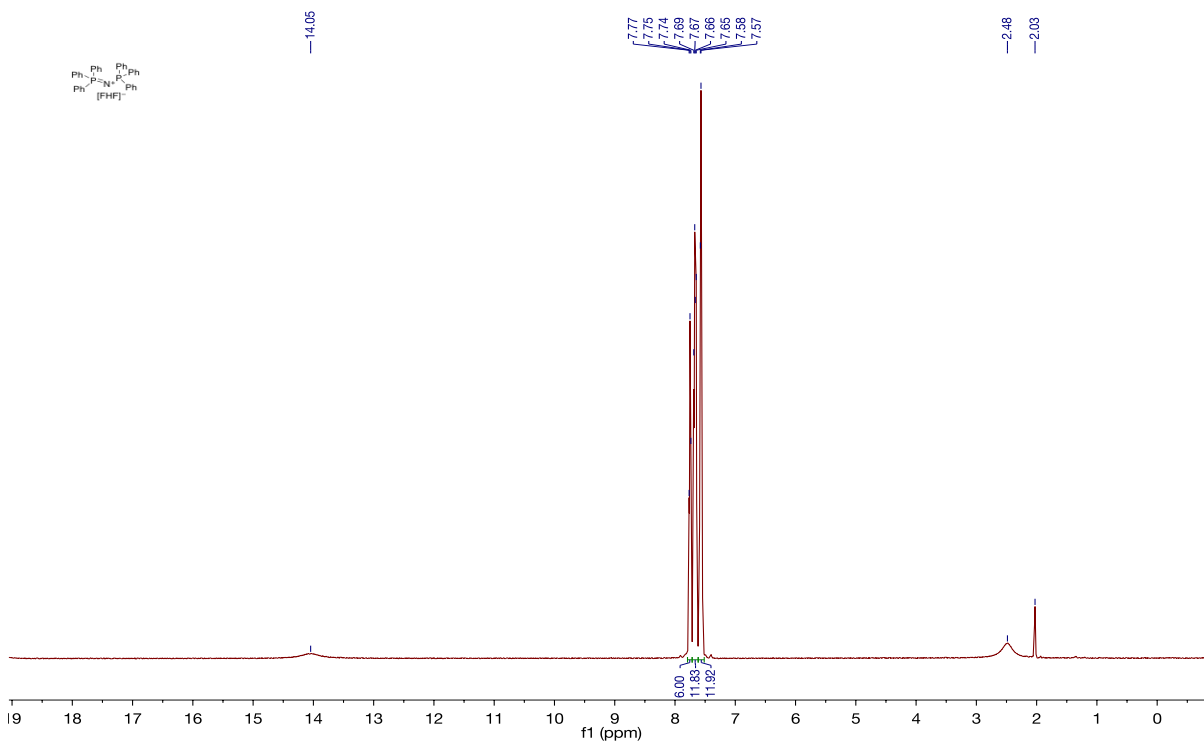

$^{13}\text{C NMR}$  ( $\text{PNP}^+[\text{FHF}]^-$ )

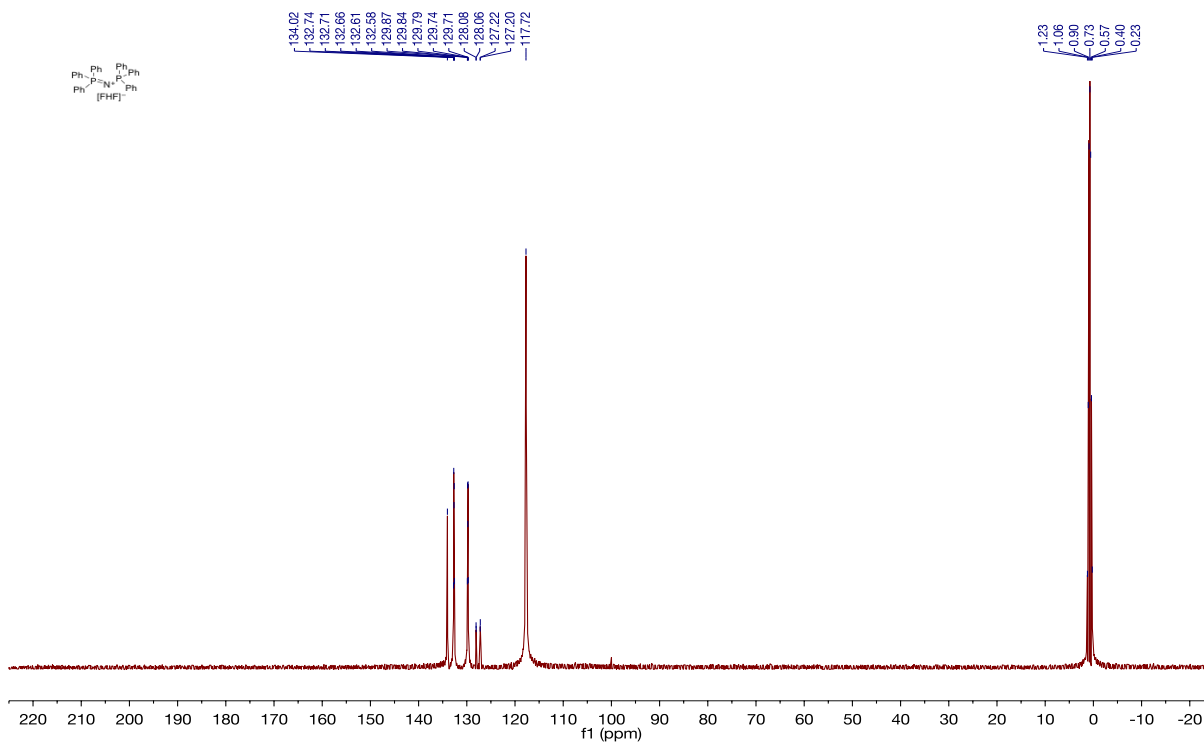



<sup>19</sup>F NMR (PNP<sup>+</sup>[FHF]<sup>-</sup>)

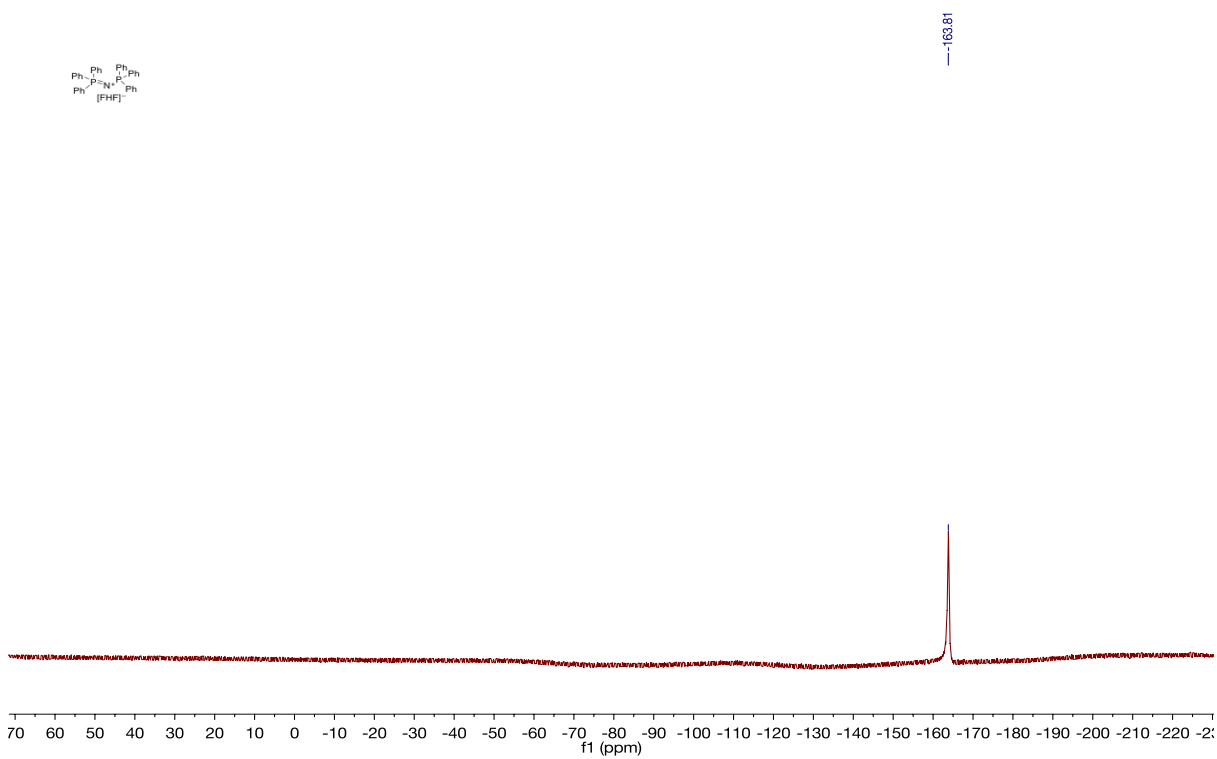

<sup>31</sup>P NMR (PNP<sup>+</sup>[FHF]<sup>-</sup>)

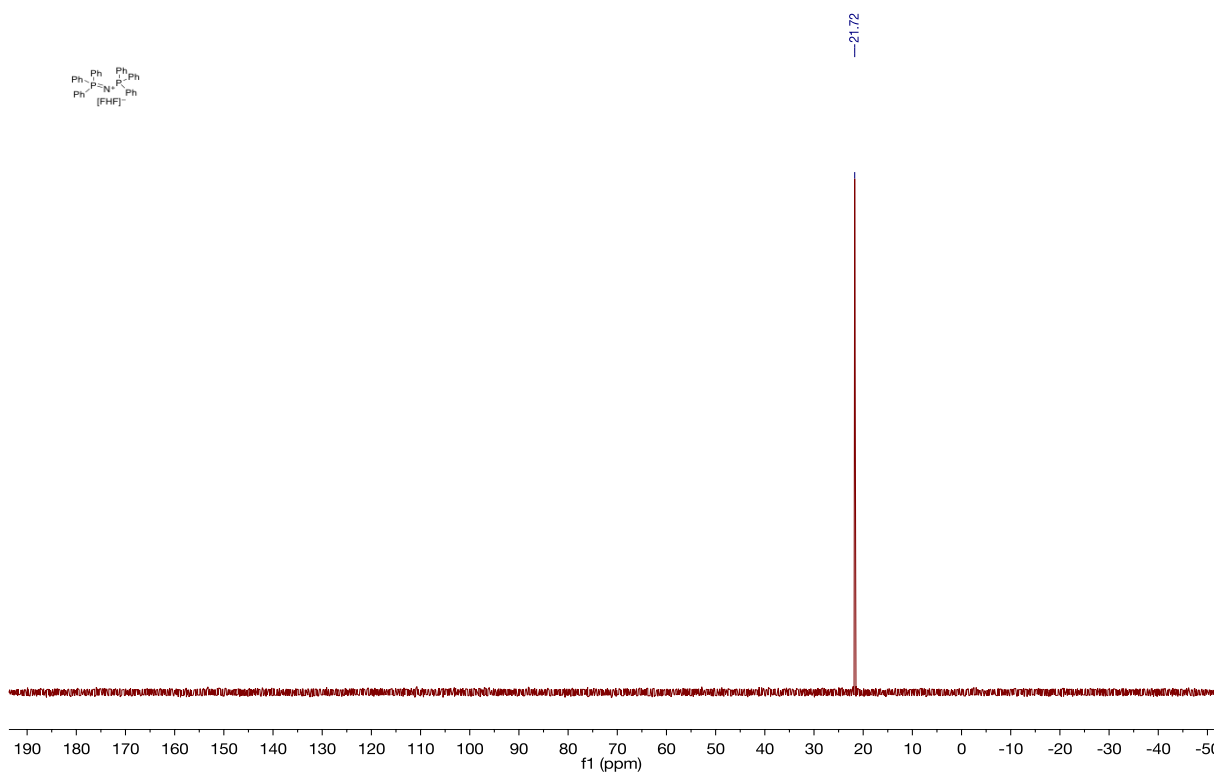

$^1\text{H NMR}$  ( $\text{PNP}^+[\text{H}_2\text{F}_3^-]$ )

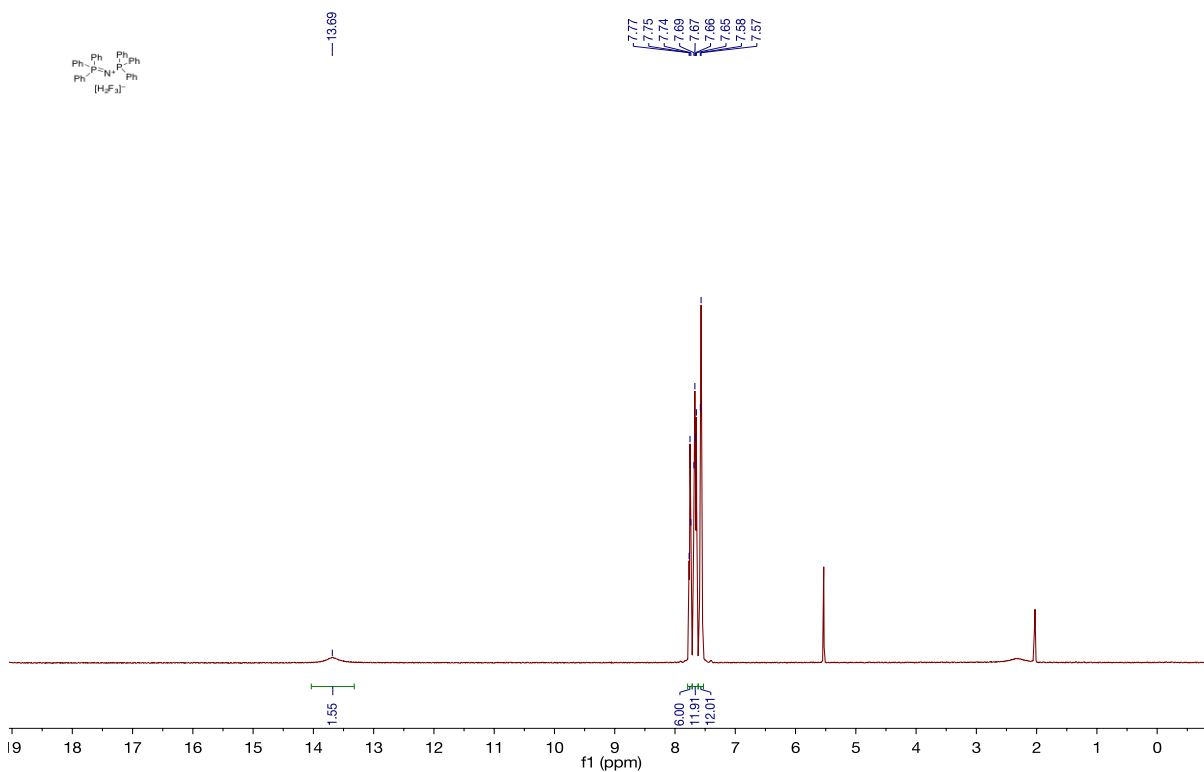

$^{13}\text{C NMR}$  ( $\text{PNP}^+[\text{H}_2\text{F}_3^-]$ )

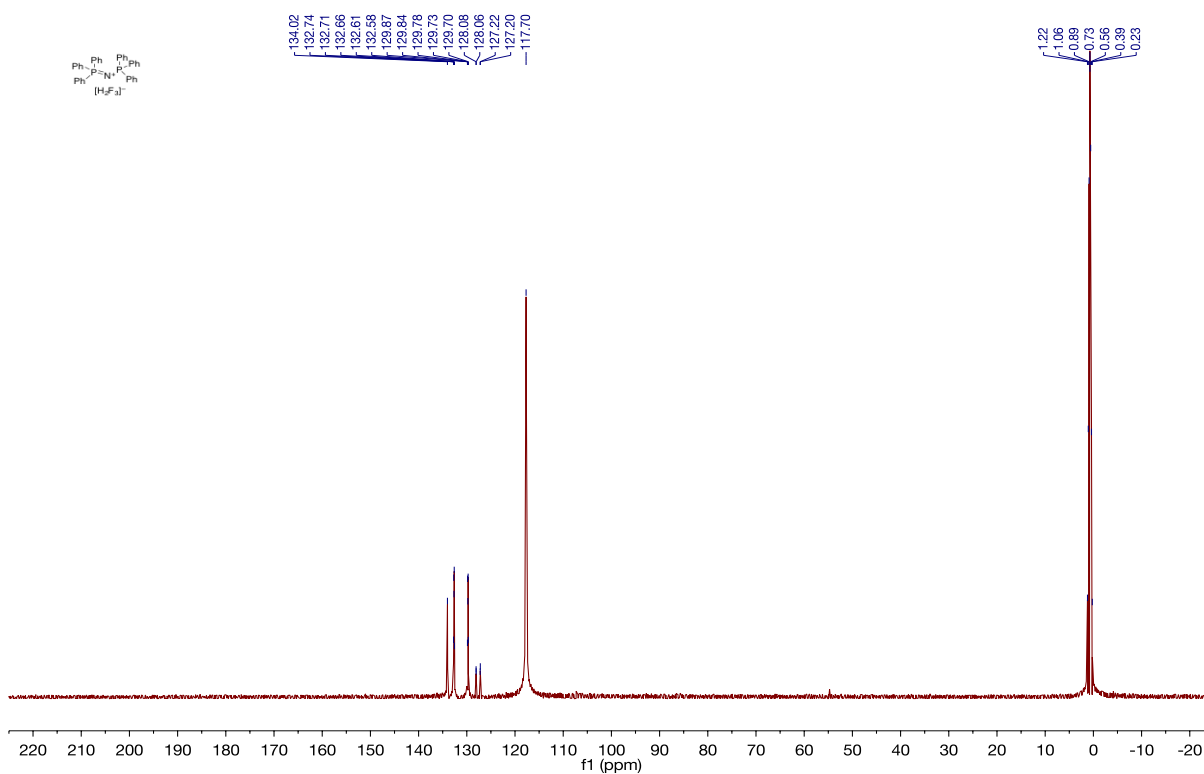

<sup>19</sup>F NMR (PNP<sup>+</sup>[H<sub>2</sub>F<sub>3</sub>]<sup>-</sup>)

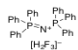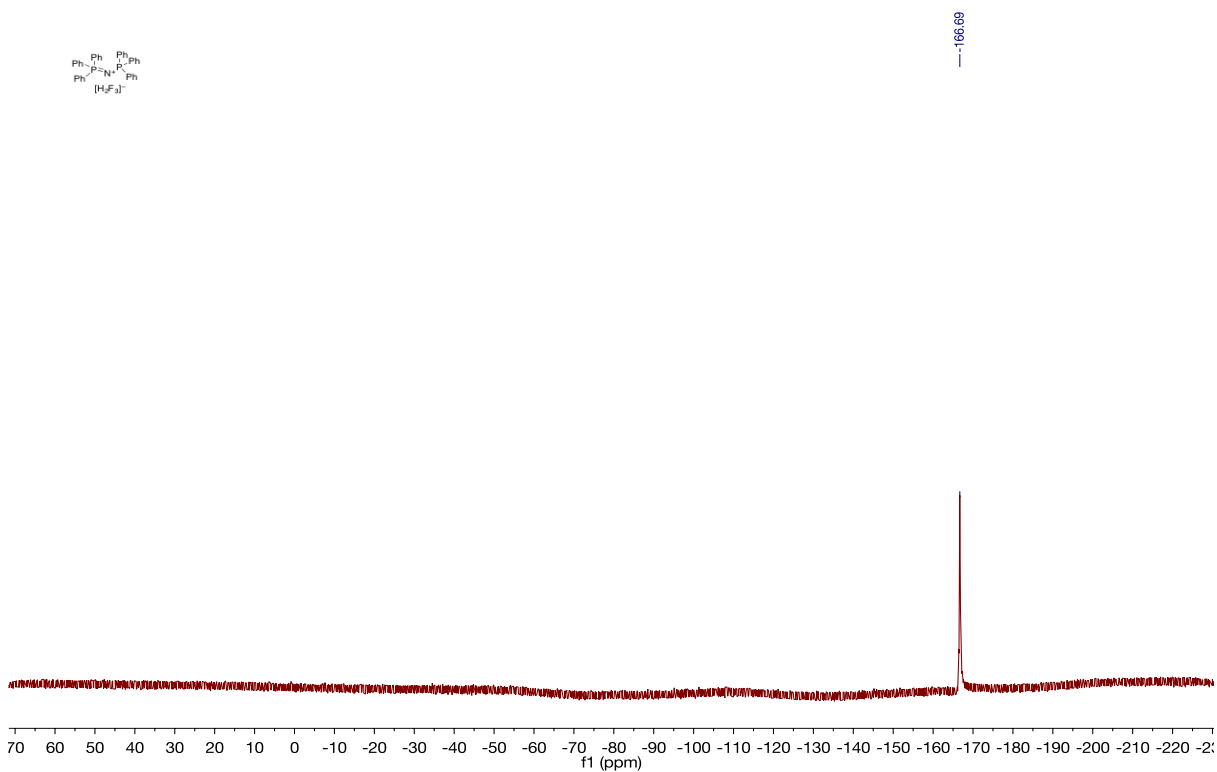

<sup>31</sup>P NMR (PNP<sup>+</sup>[H<sub>2</sub>F<sub>3</sub>]<sup>-</sup>)

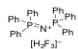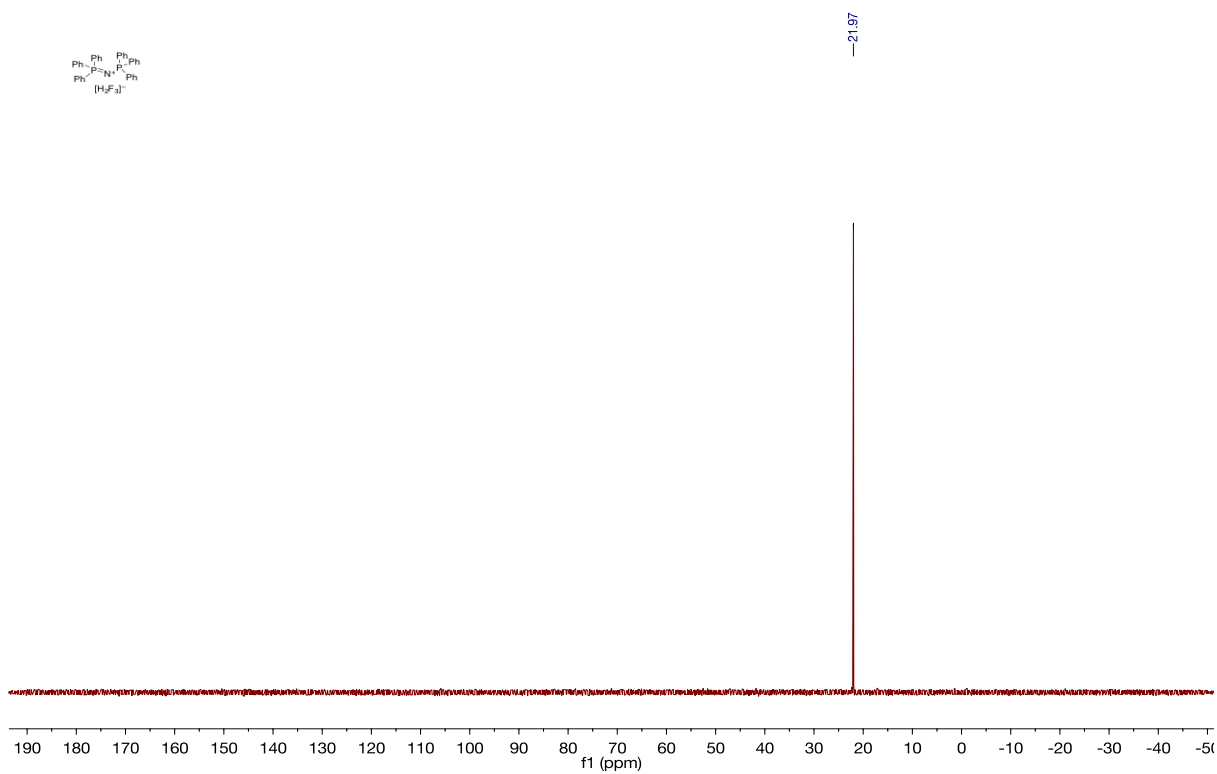

<sup>1</sup>H NMR (EMI<sup>+</sup>[H<sub>3</sub>F<sub>4</sub><sup>-</sup>])

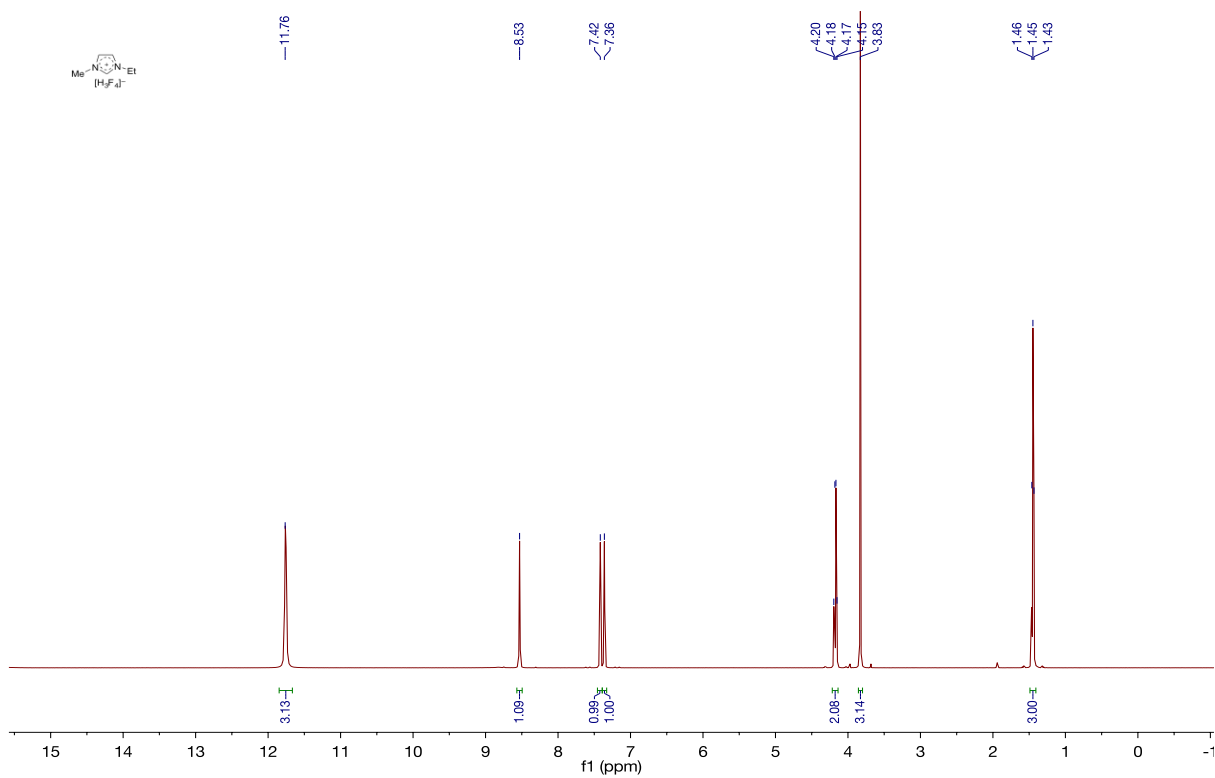

<sup>13</sup>C NMR (EMI<sup>+</sup>[H<sub>3</sub>F<sub>4</sub><sup>-</sup>])

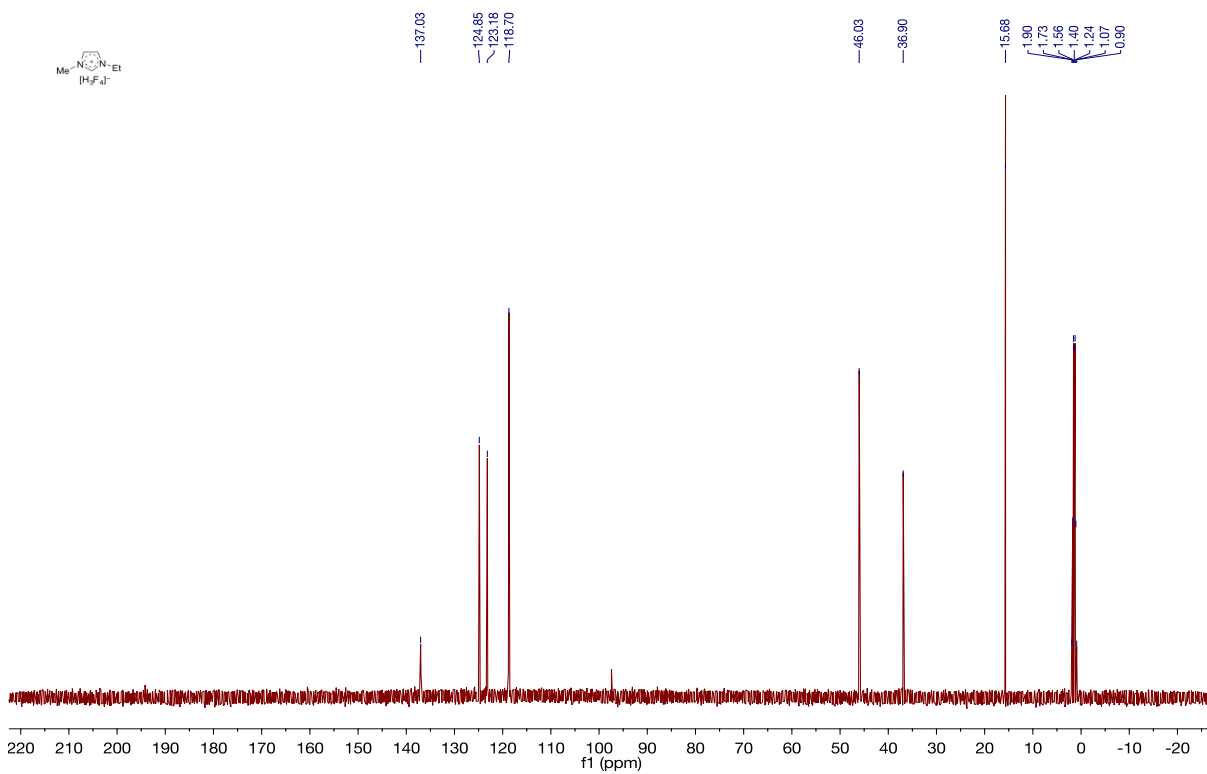

<sup>19</sup>F NMR (EMI<sup>+</sup>[H<sub>3</sub>F<sub>4</sub><sup>-</sup>])

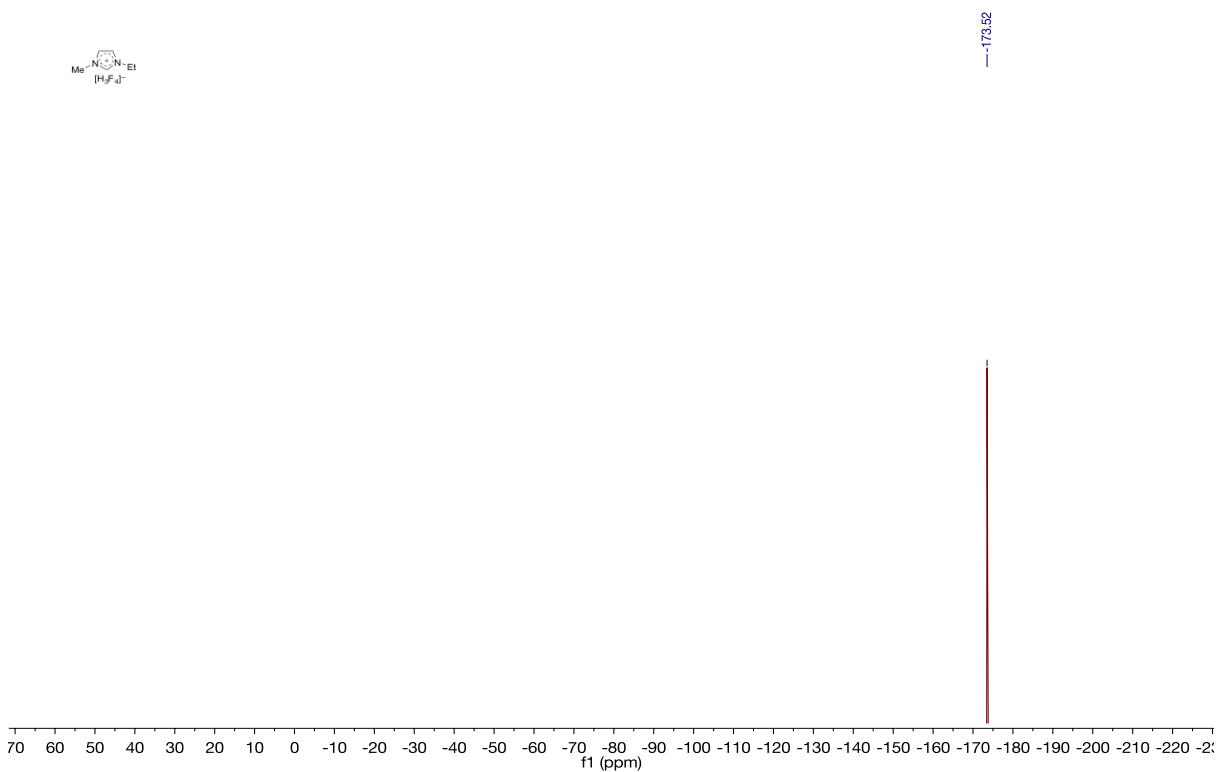

<sup>1</sup>H NMR (EMI<sup>+</sup>[PF<sub>6</sub><sup>-</sup>])

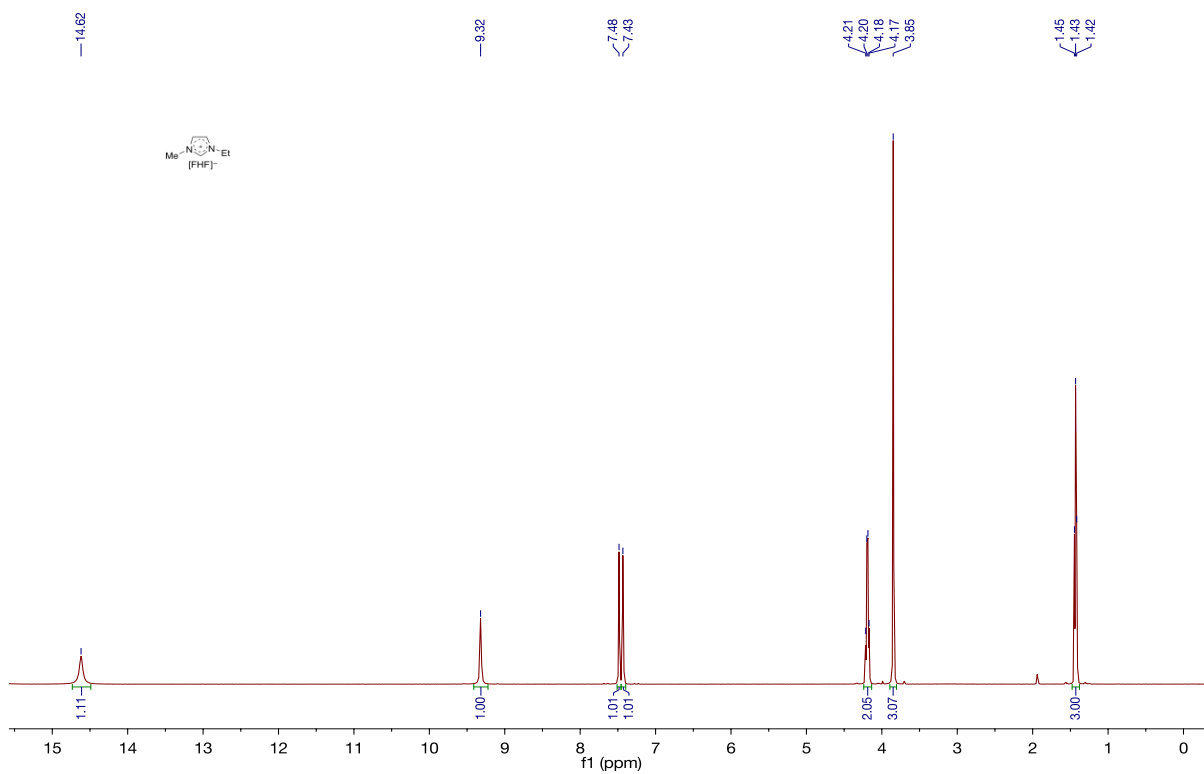

<sup>13</sup>C NMR (EMI<sup>+</sup>[FHF]<sup>-</sup>)

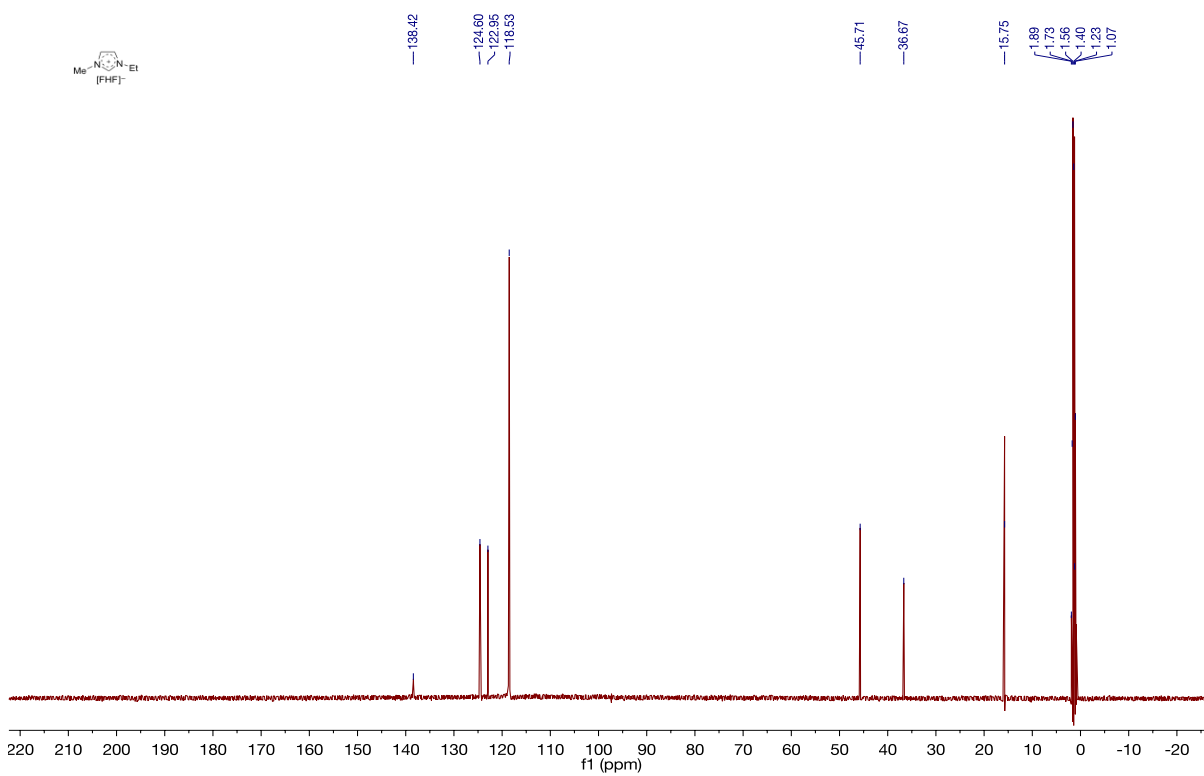

<sup>19</sup>F NMR (EMI<sup>+</sup>[FHF]<sup>-</sup>)

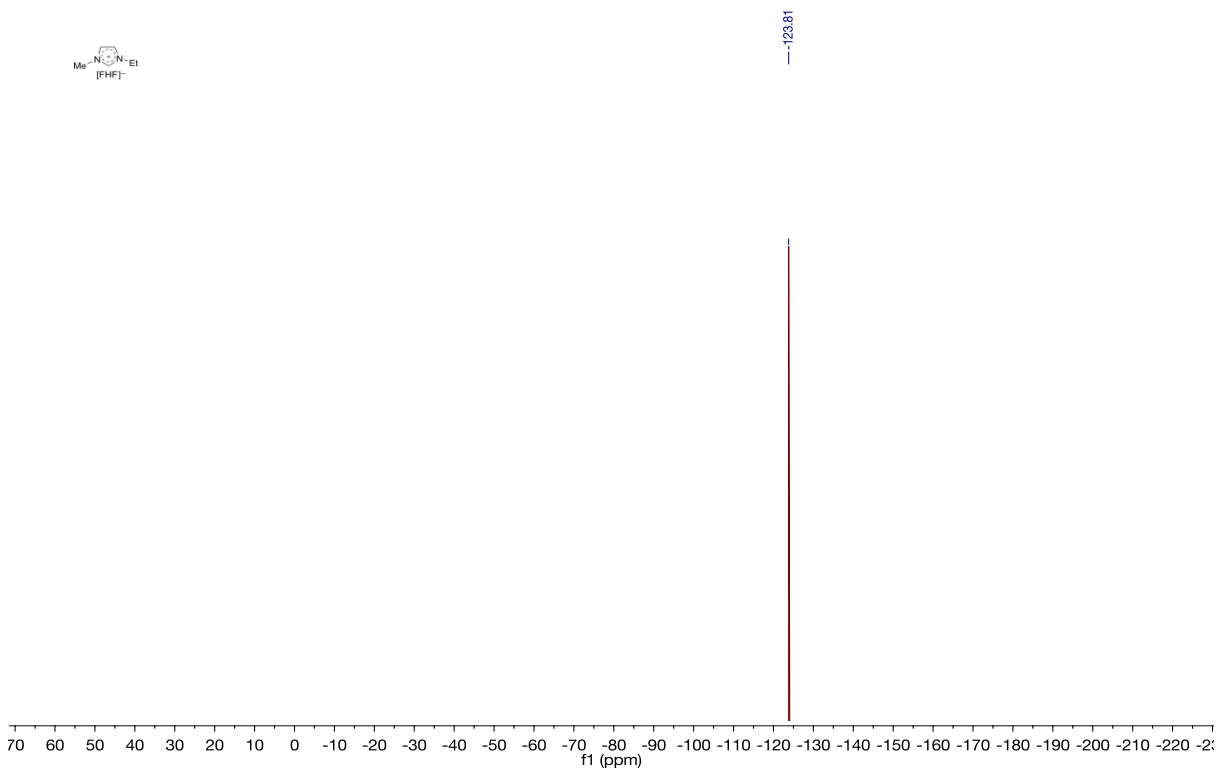

<sup>1</sup>H NMR (AB-1)

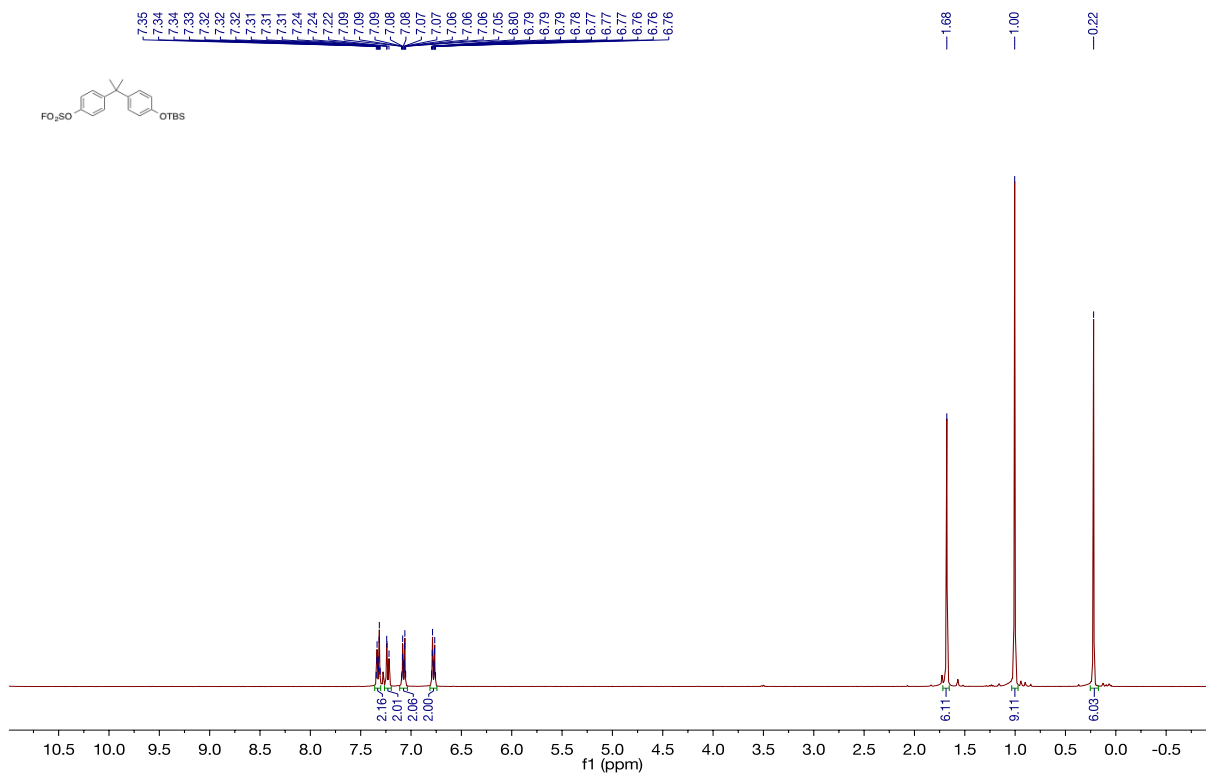

<sup>13</sup>C NMR (AB-1)

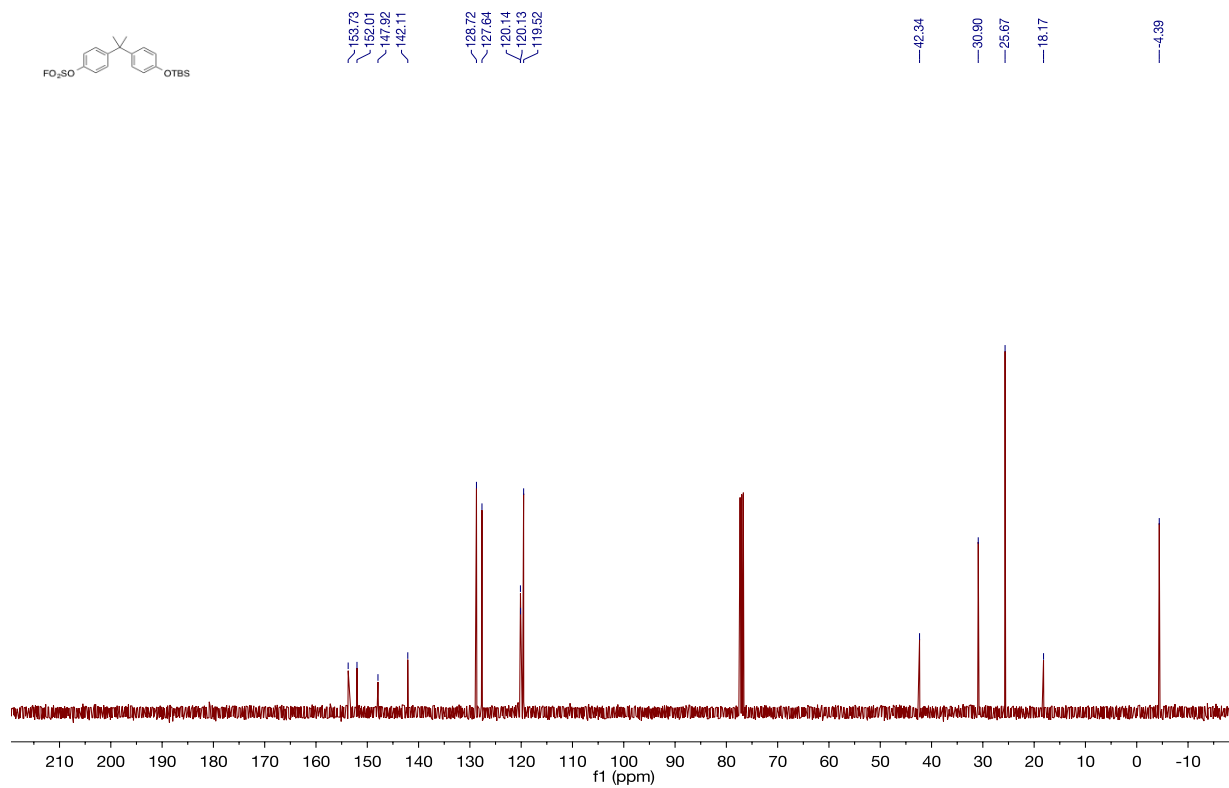

<sup>19</sup>F NMR (AB-1)

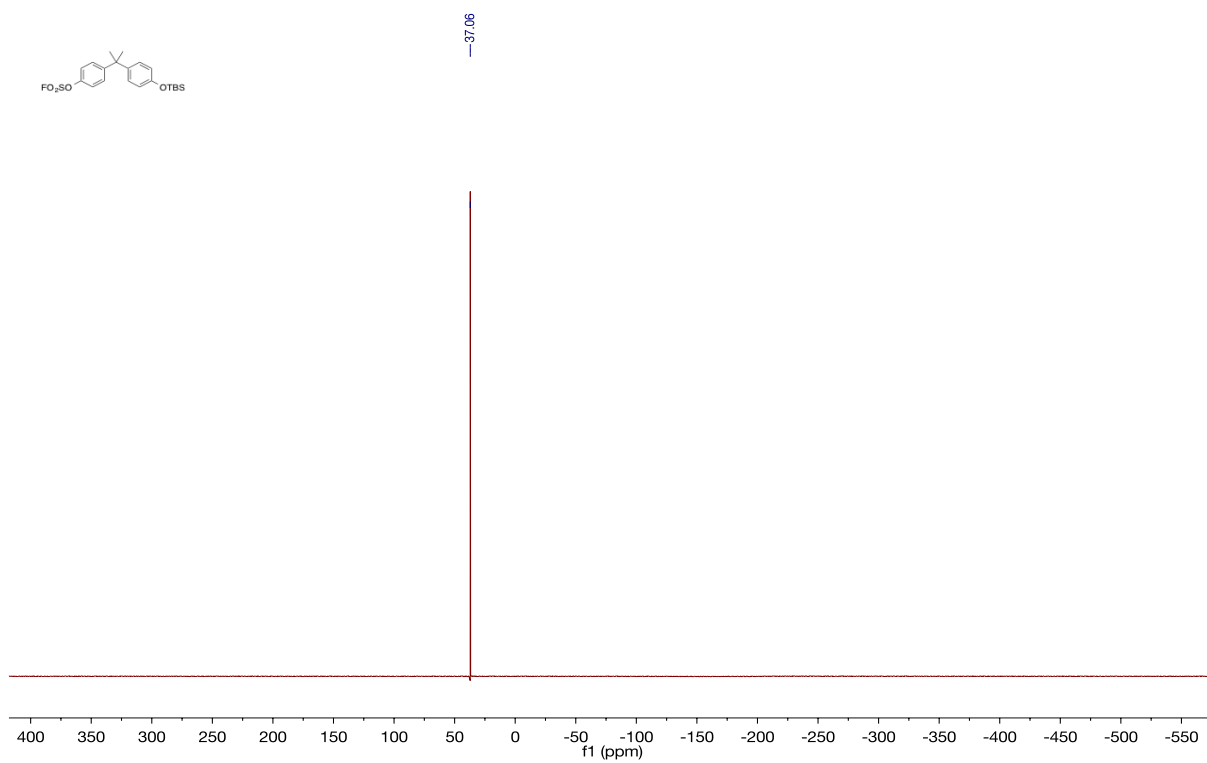

<sup>1</sup>H NMR (A-3)

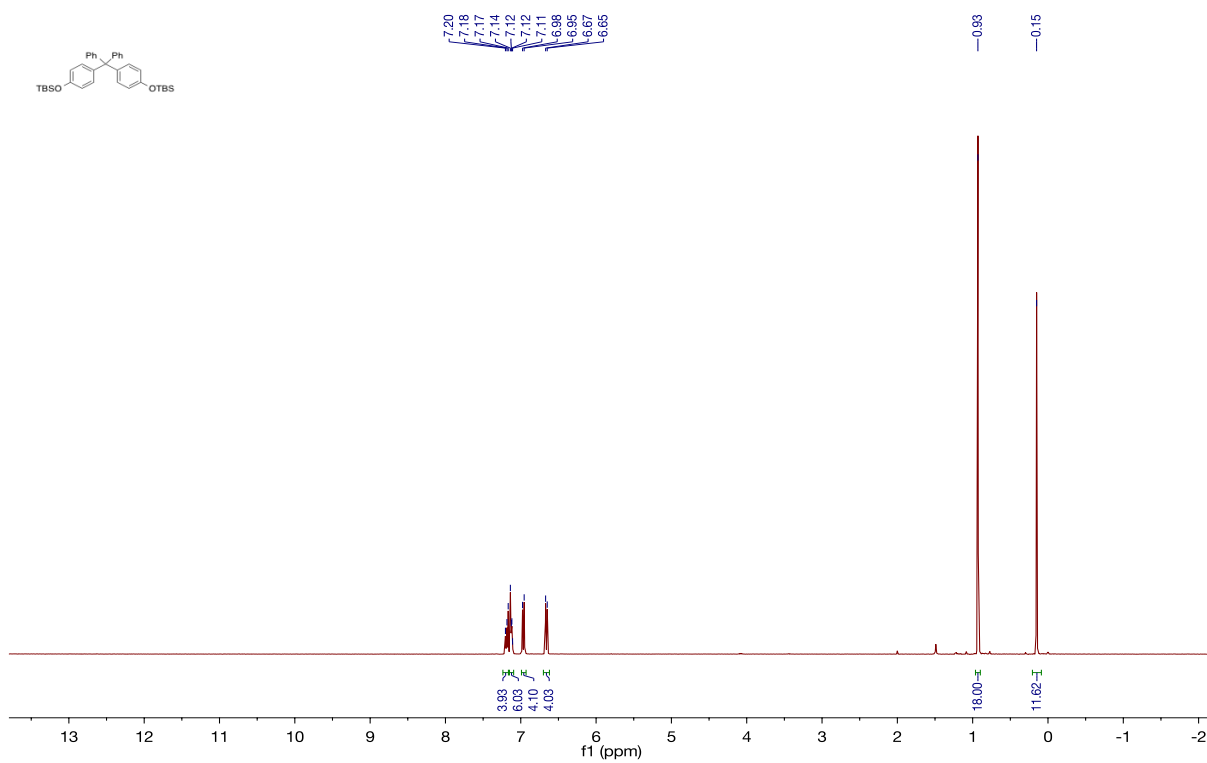



<sup>13</sup>C NMR (A-3)

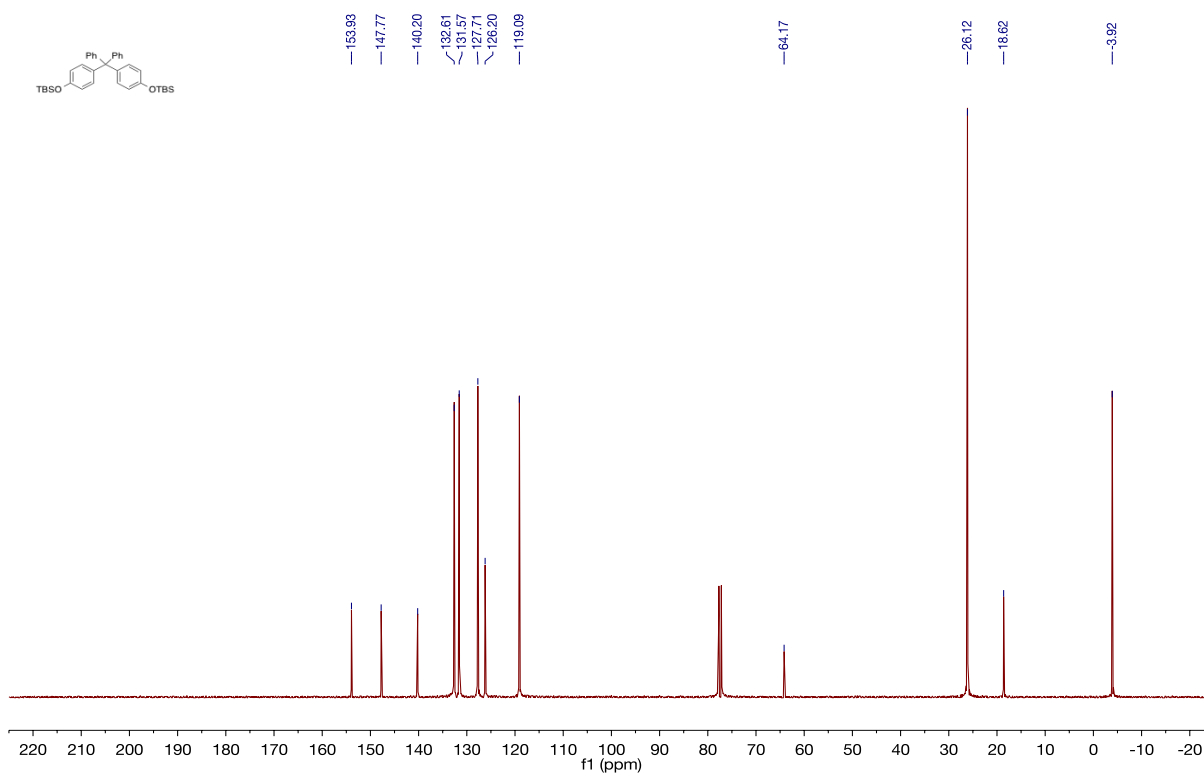

<sup>1</sup>H NMR (B-3)

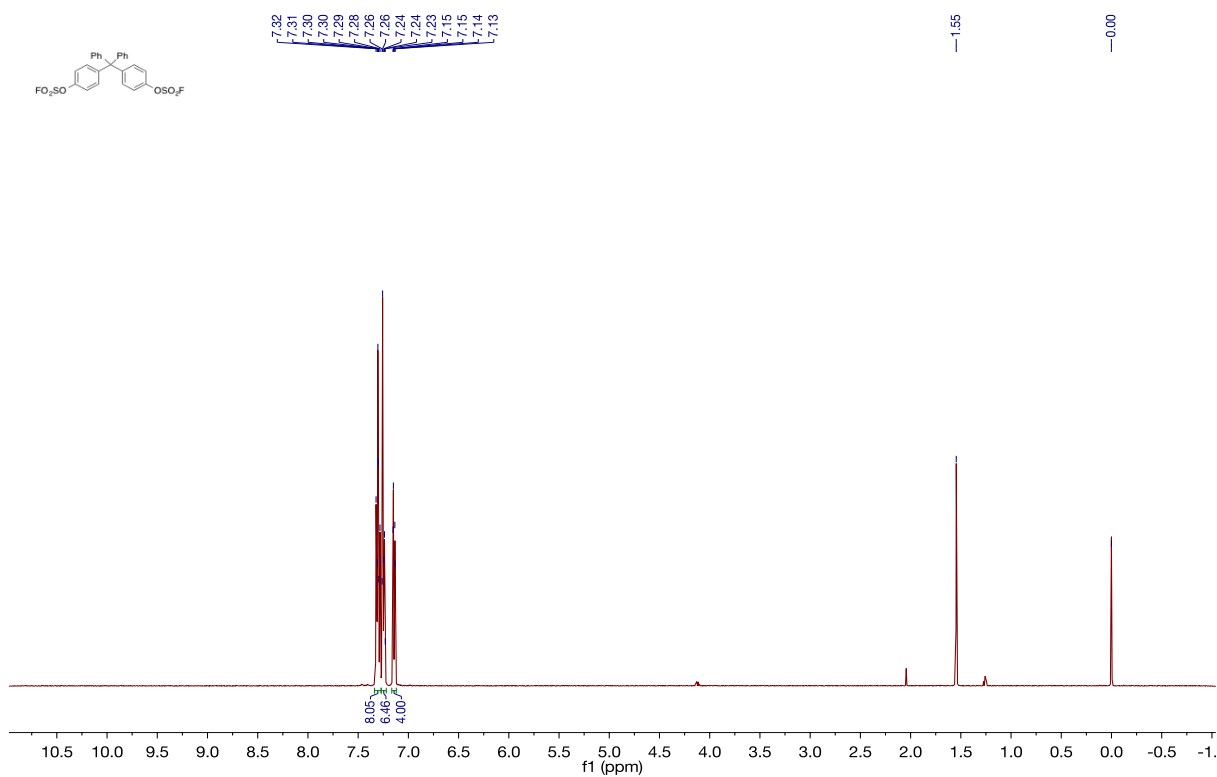

<sup>13</sup>C NMR (B-3)

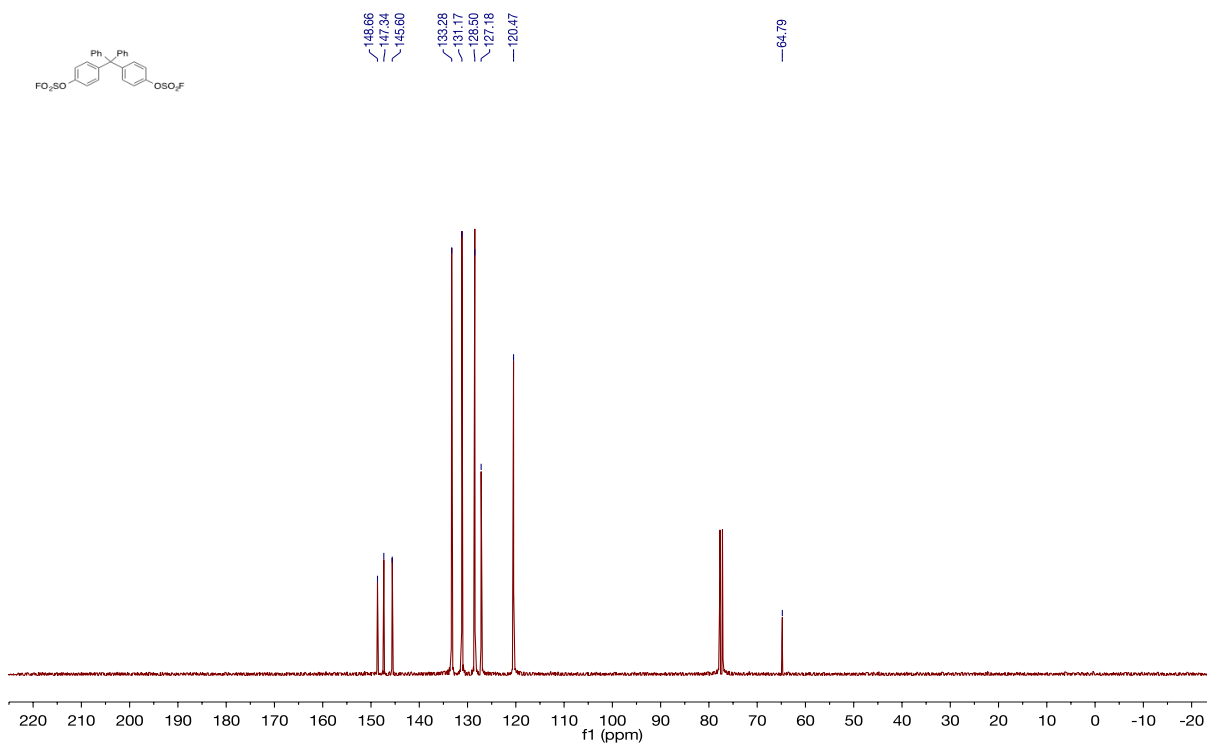

<sup>19</sup>F NMR (B-3)

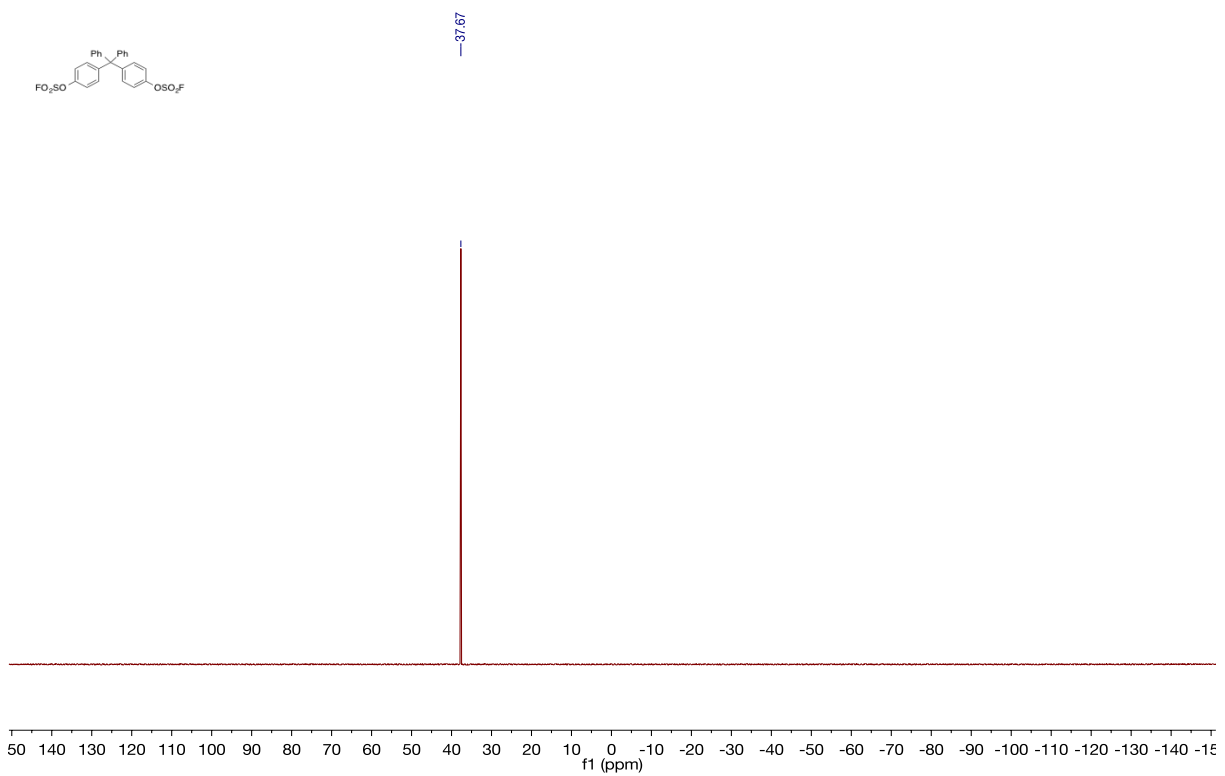

<sup>1</sup>H NMR (A-4)

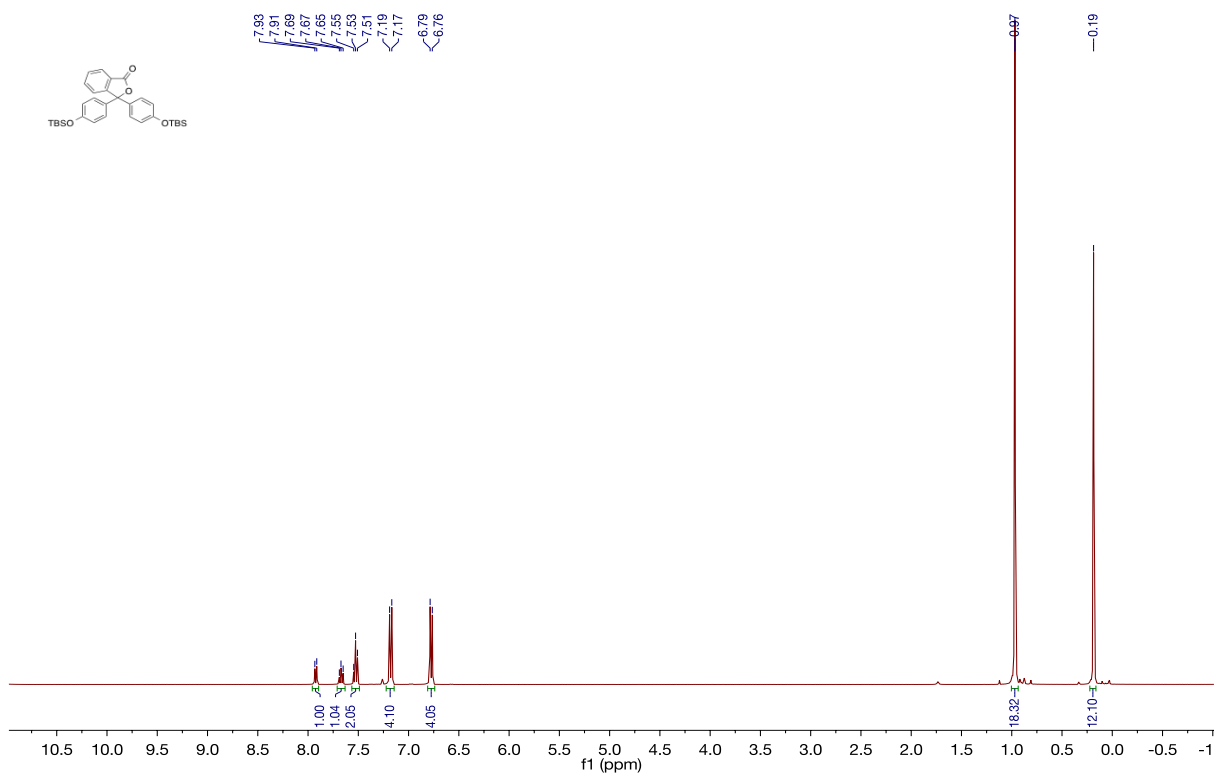

<sup>13</sup>C NMR (A-4)

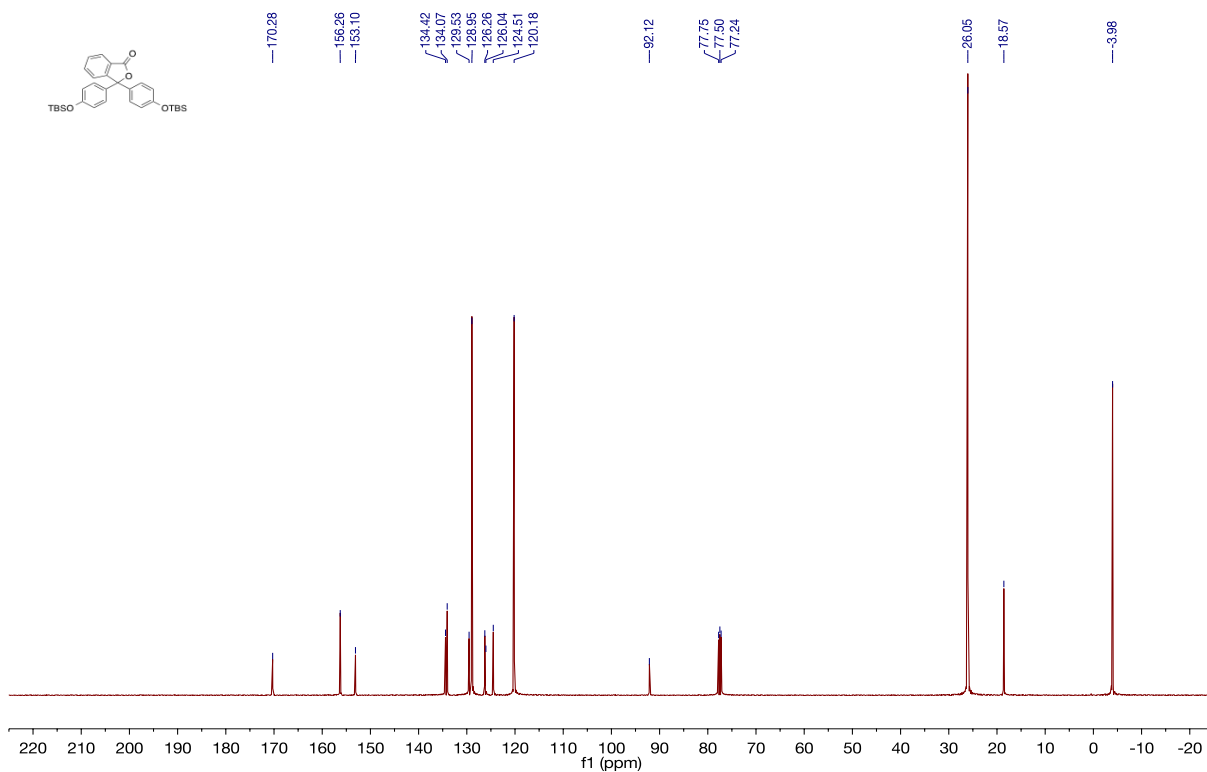

<sup>1</sup>H NMR (A-5)

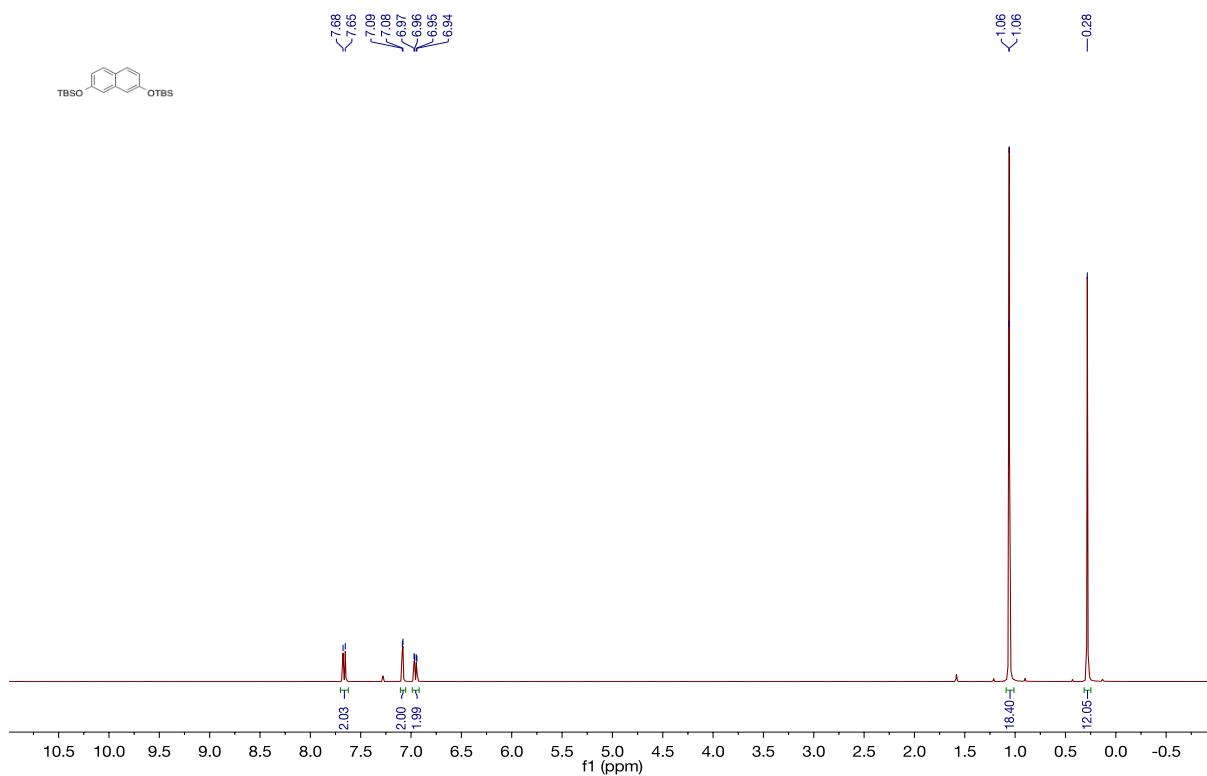

<sup>13</sup>C NMR (A-5)

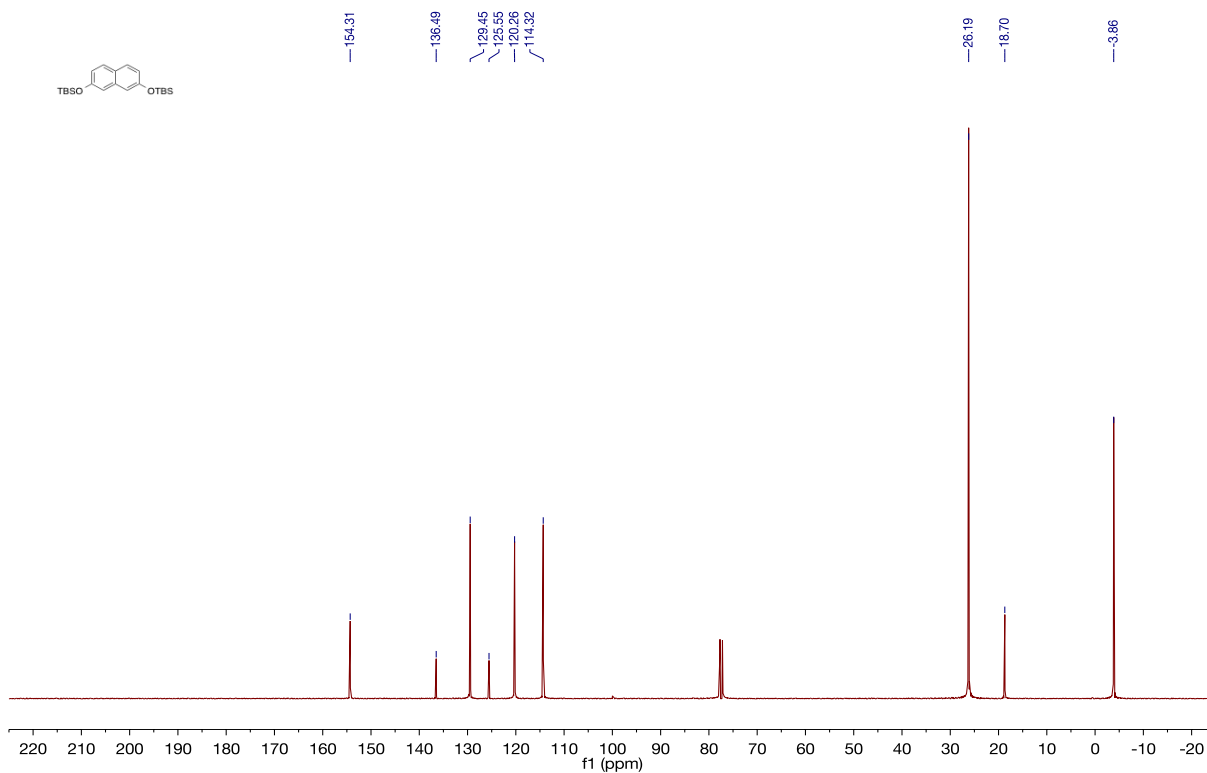

<sup>1</sup>H NMR (A-7)

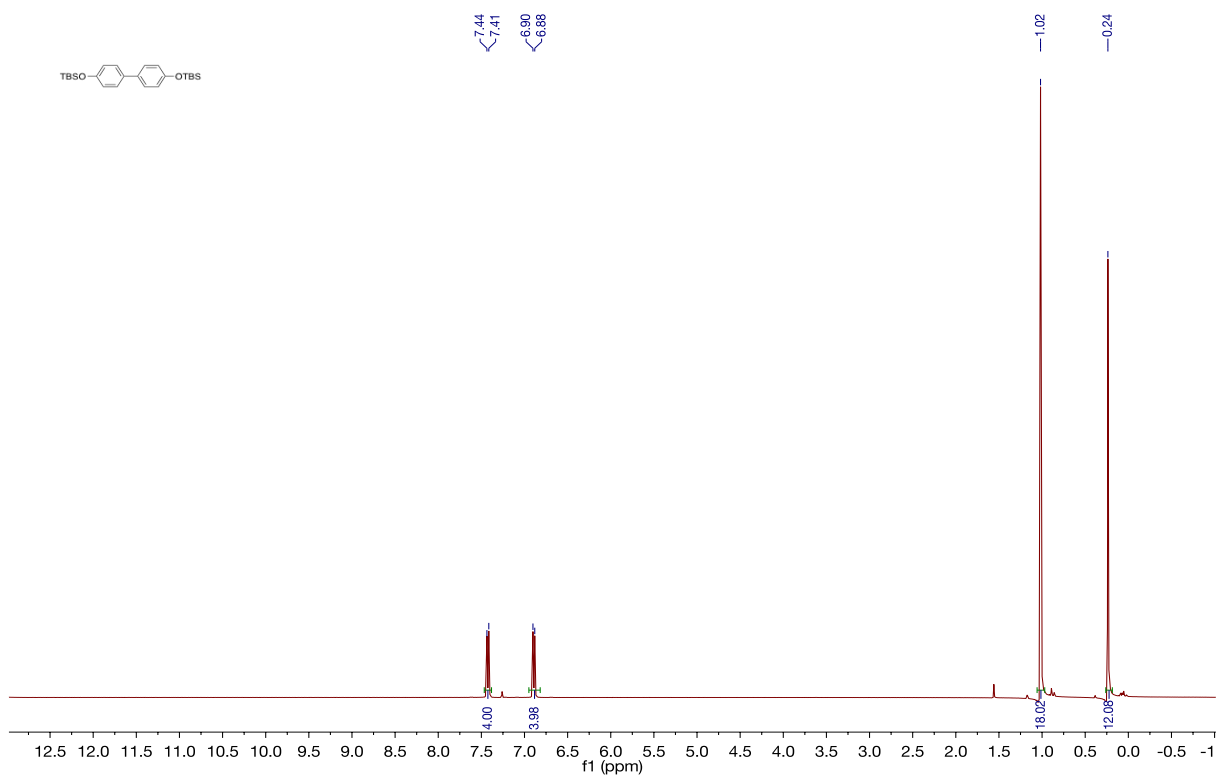

<sup>13</sup>C NMR (A-7)

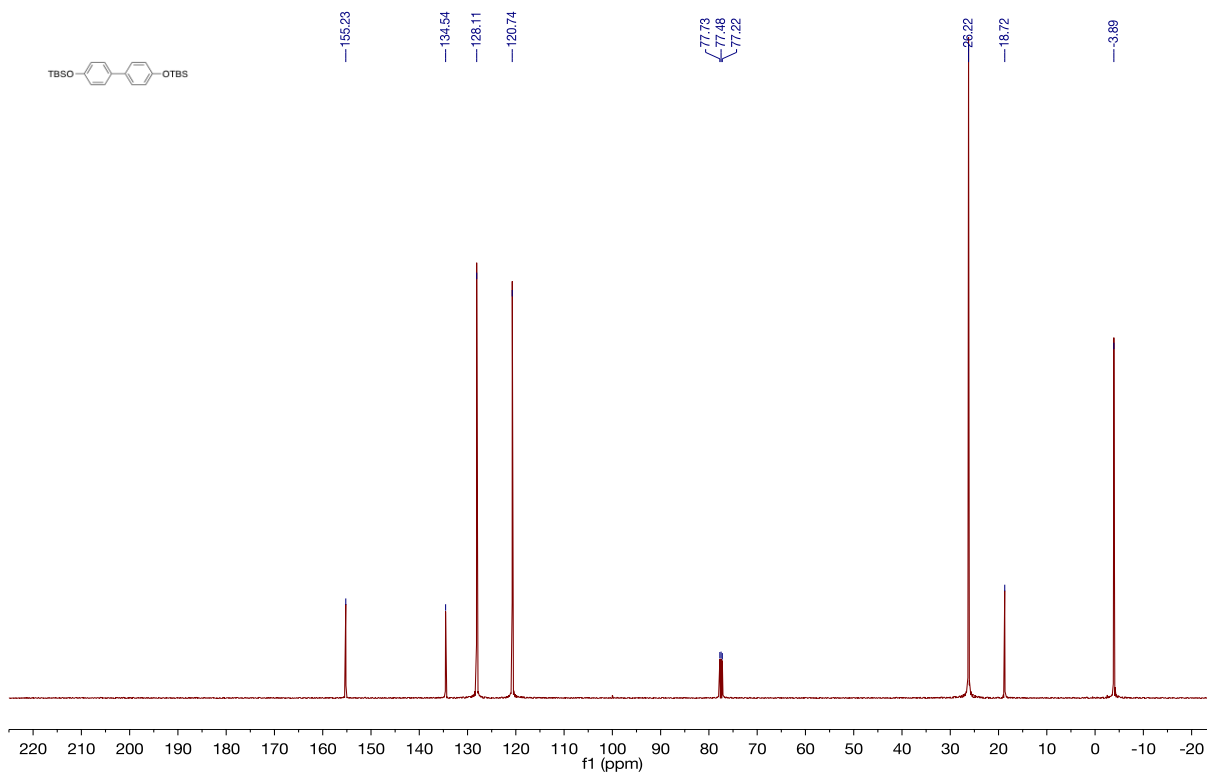

**<sup>1</sup>H NMR (B-7)**

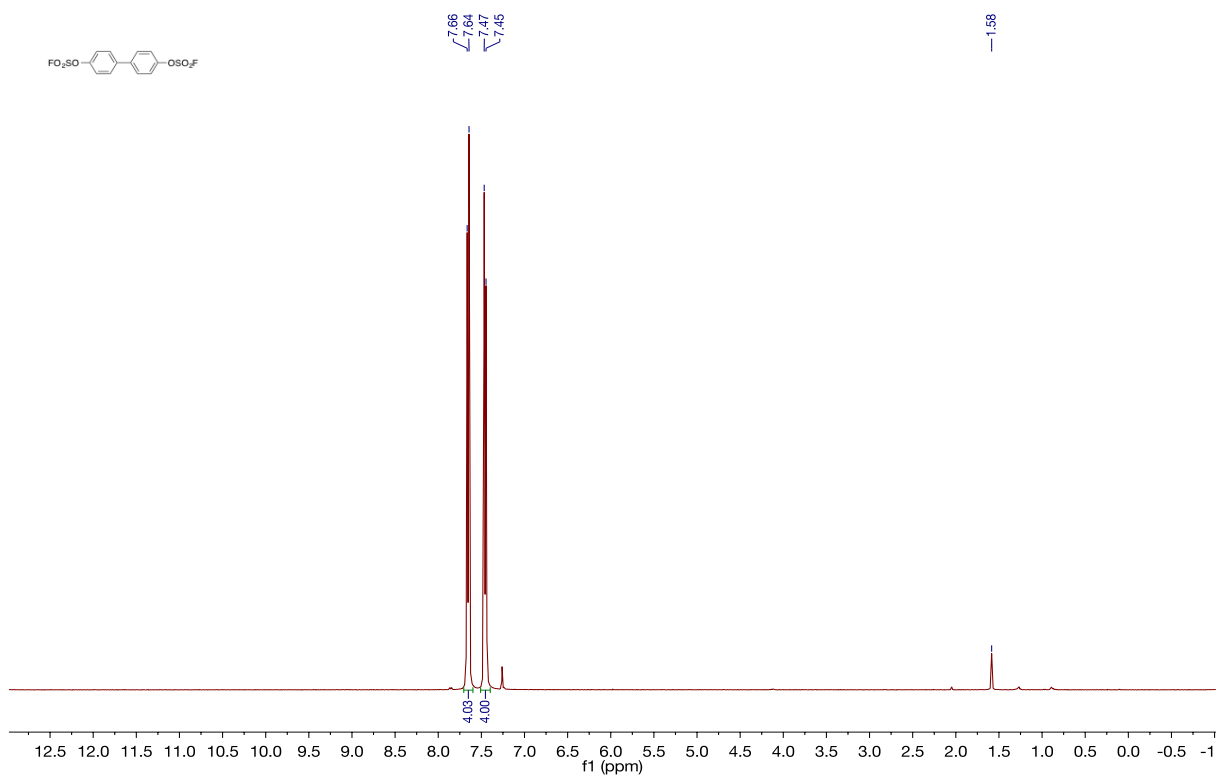

**<sup>13</sup>C NMR (B-7)**

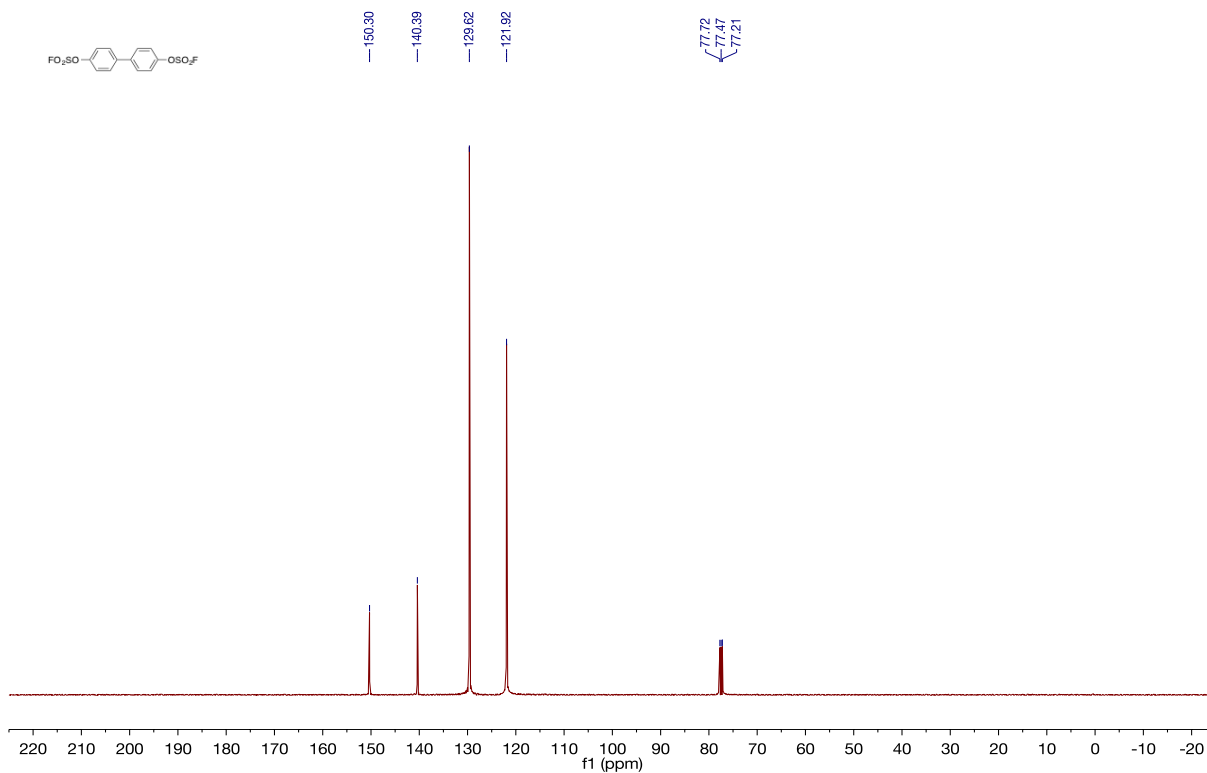



<sup>13</sup>C NMR (A-8)

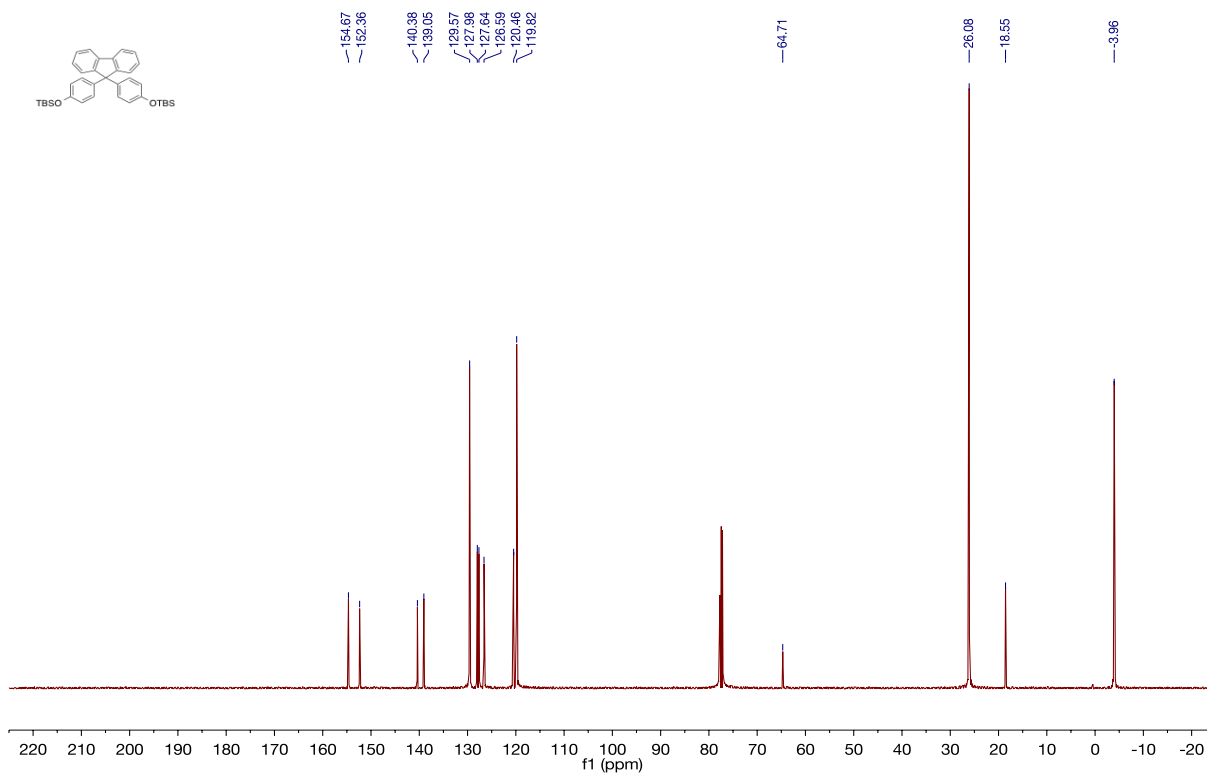

<sup>1</sup>H NMR (B-8)

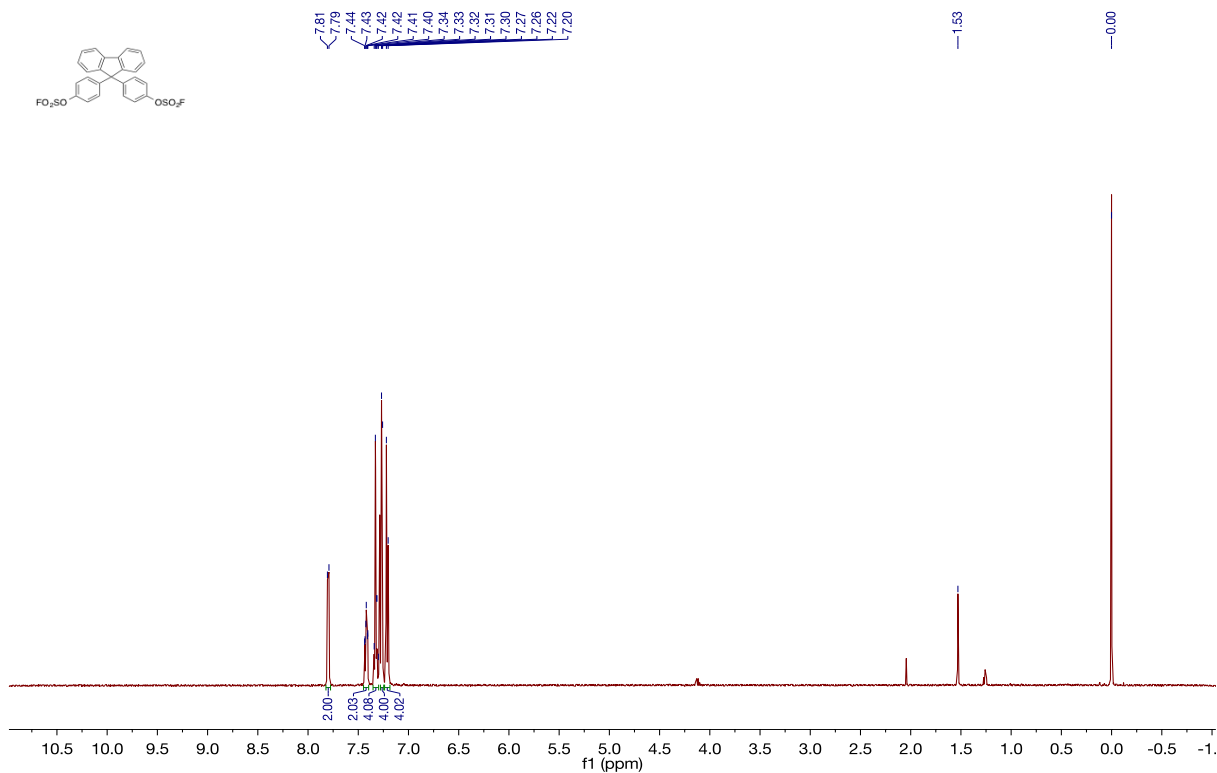



<sup>13</sup>C NMR (B-8)

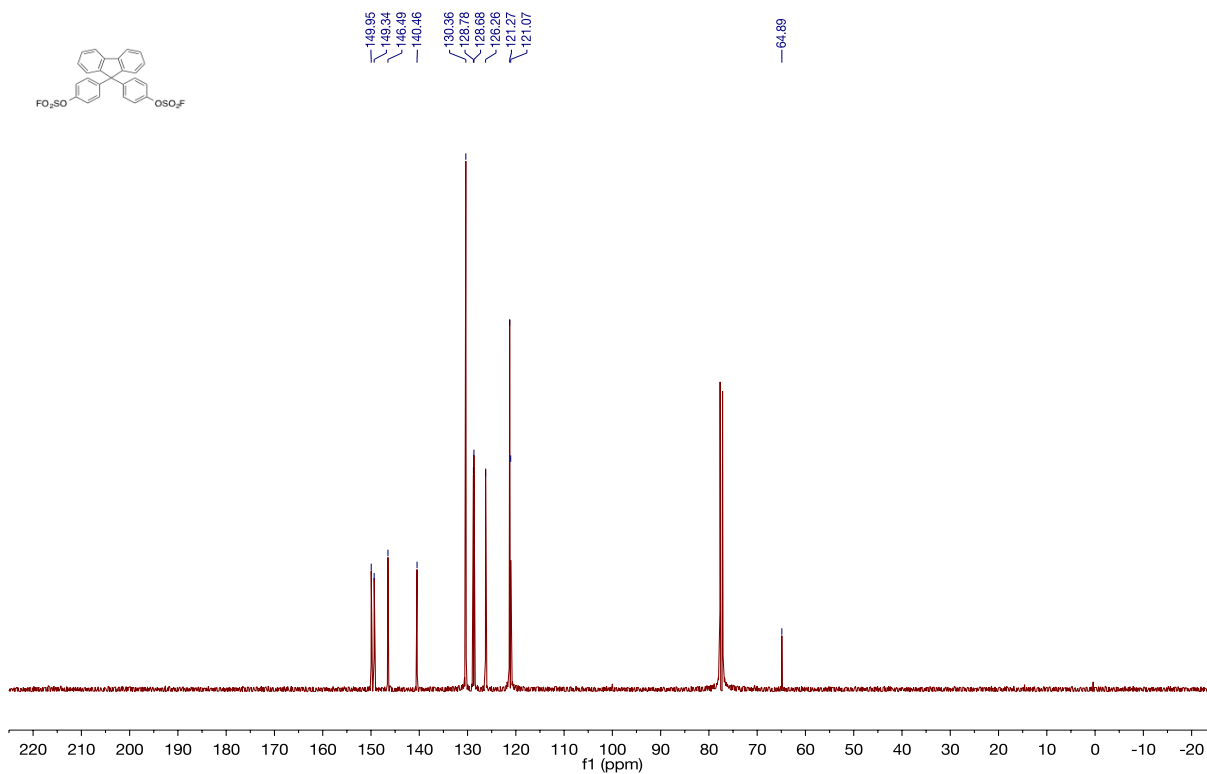

<sup>19</sup>F NMR (B-8)

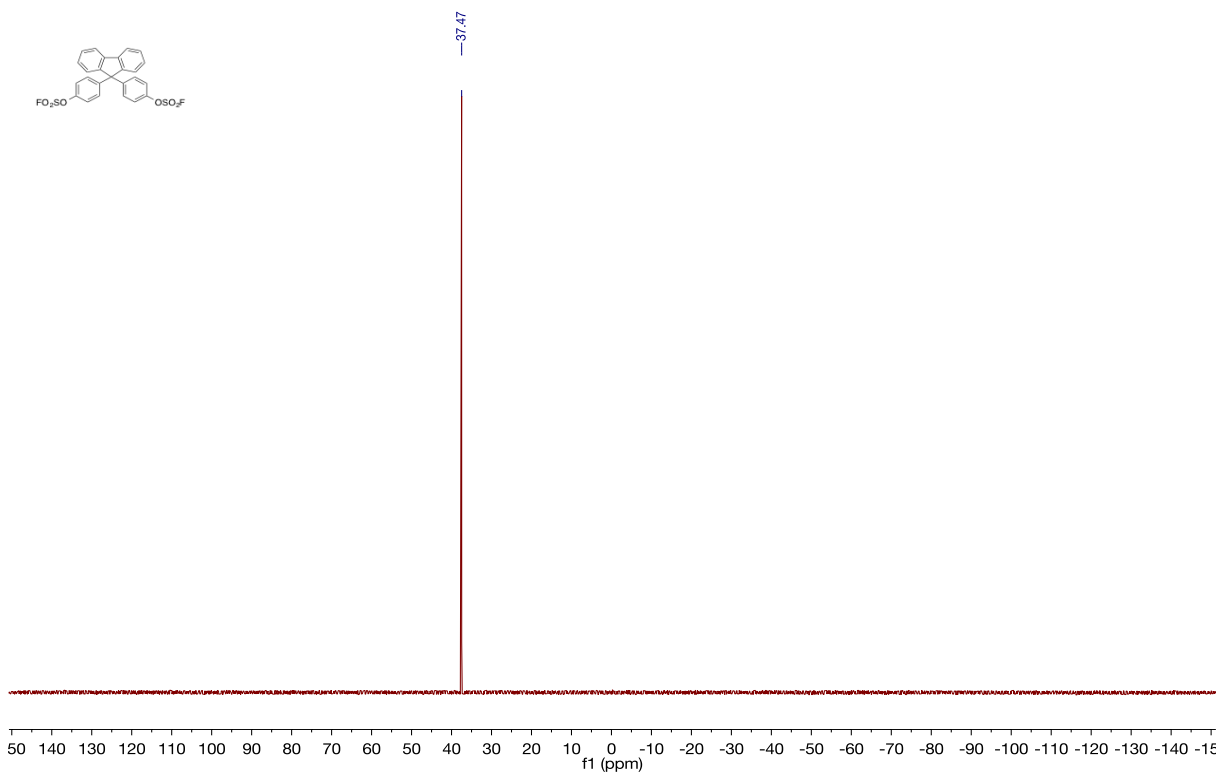



<sup>1</sup>H NMR (B-9)

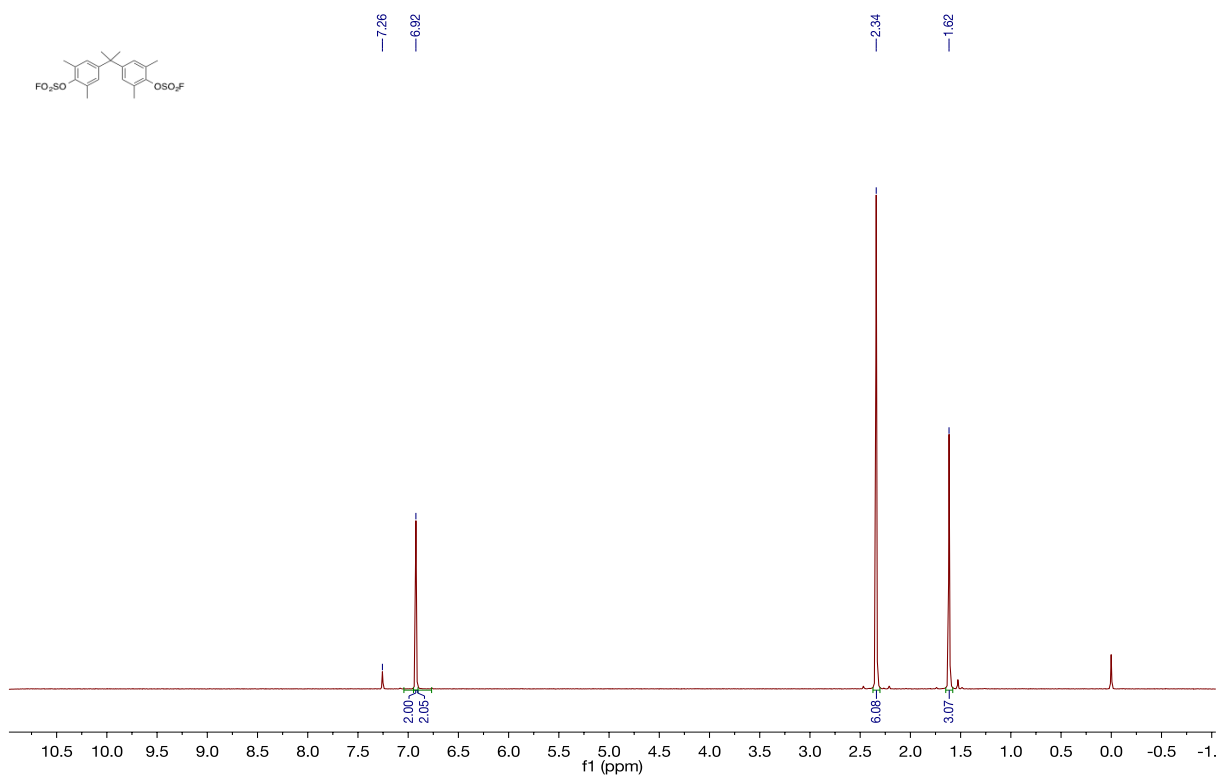

<sup>13</sup>C NMR (B-9)

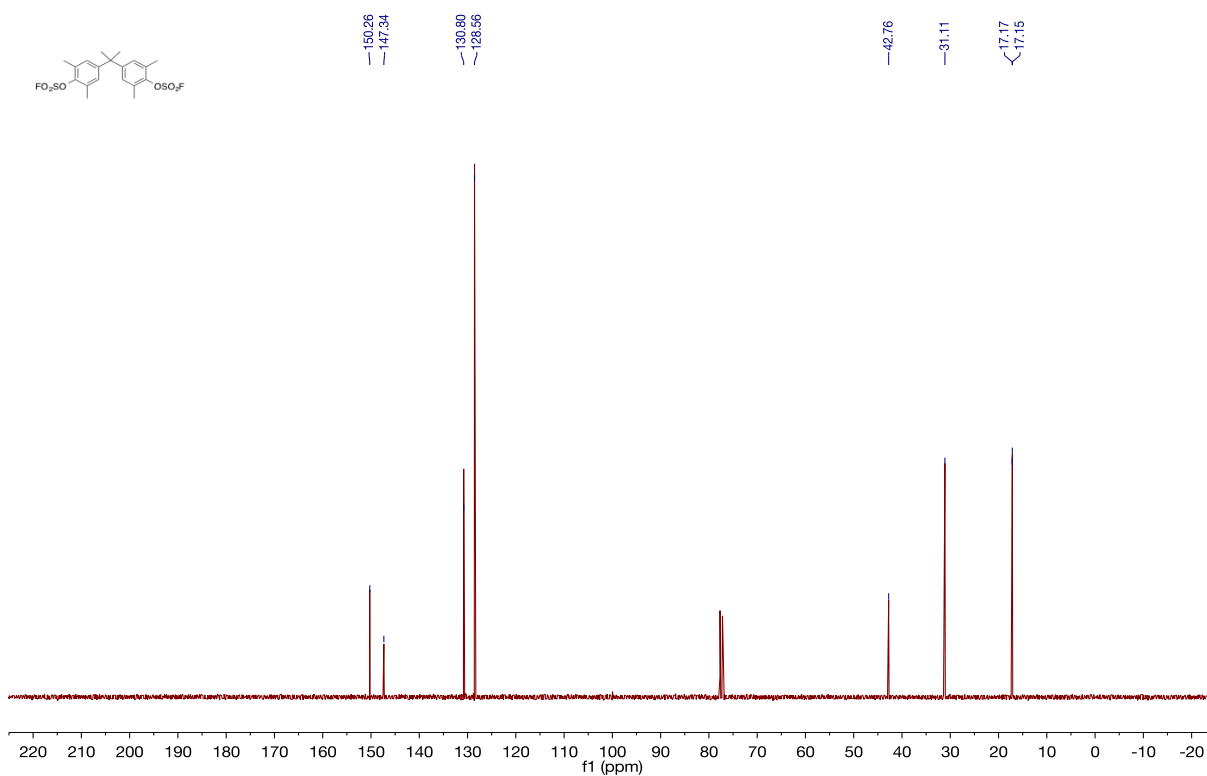

<sup>19</sup>F NMR (B-9)

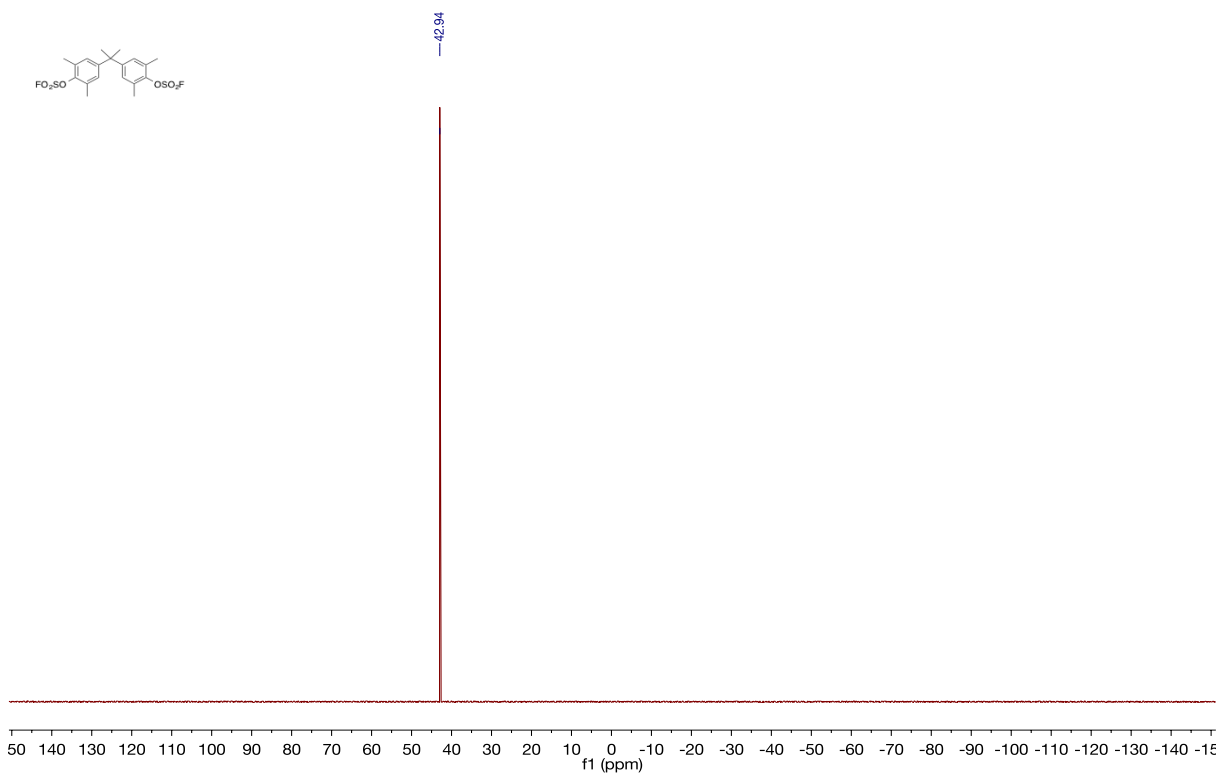

<sup>1</sup>H NMR (A-10)

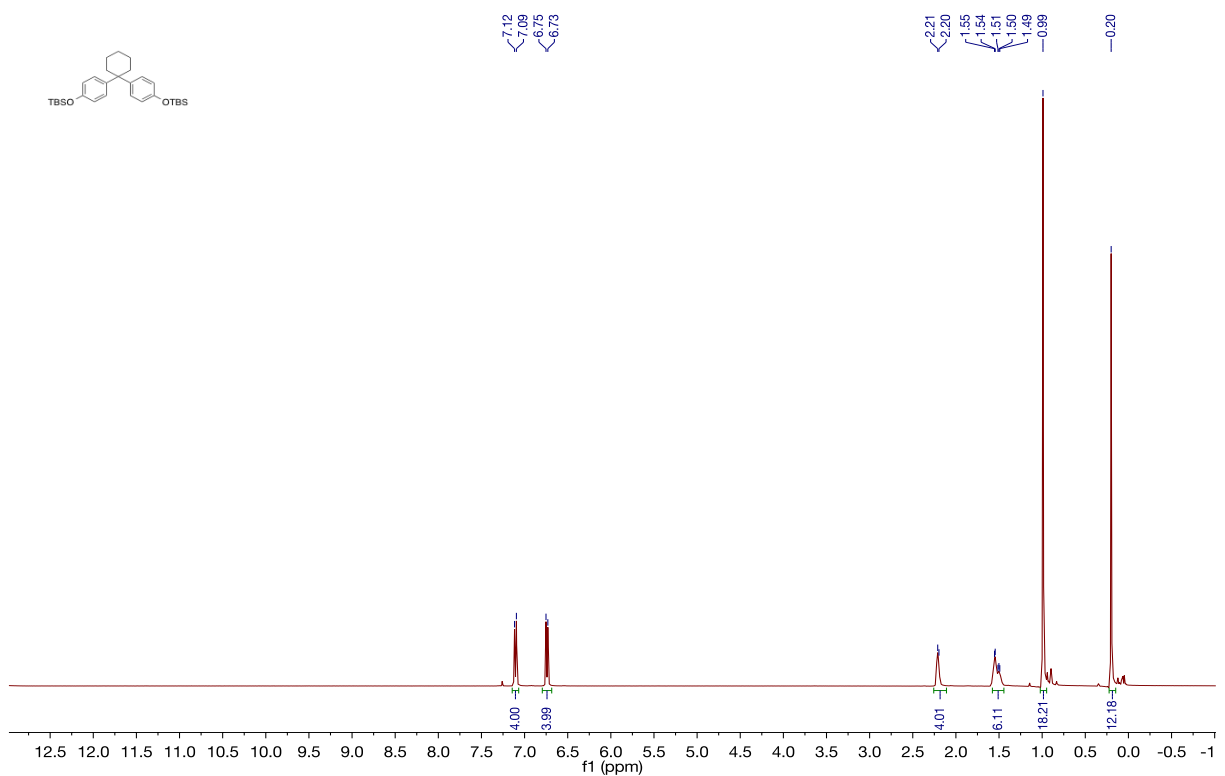

<sup>13</sup>C NMR (A-10)

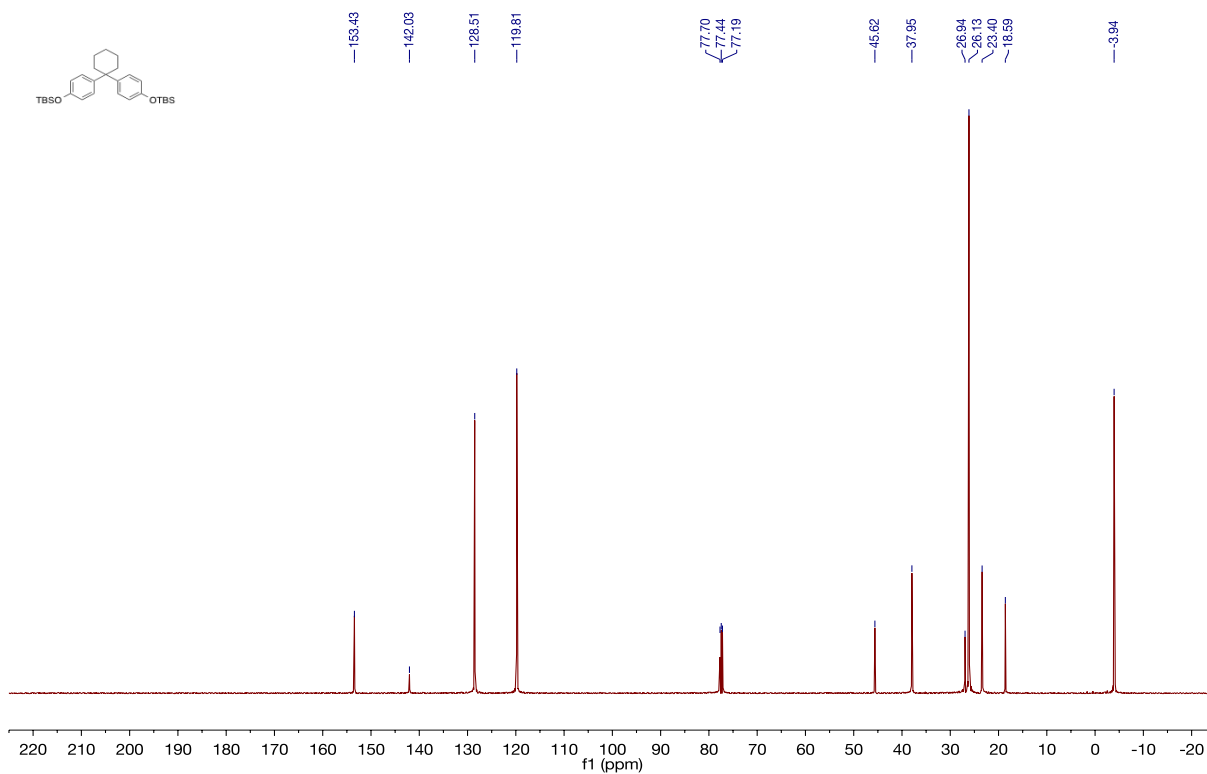

<sup>1</sup>H NMR (B-10)

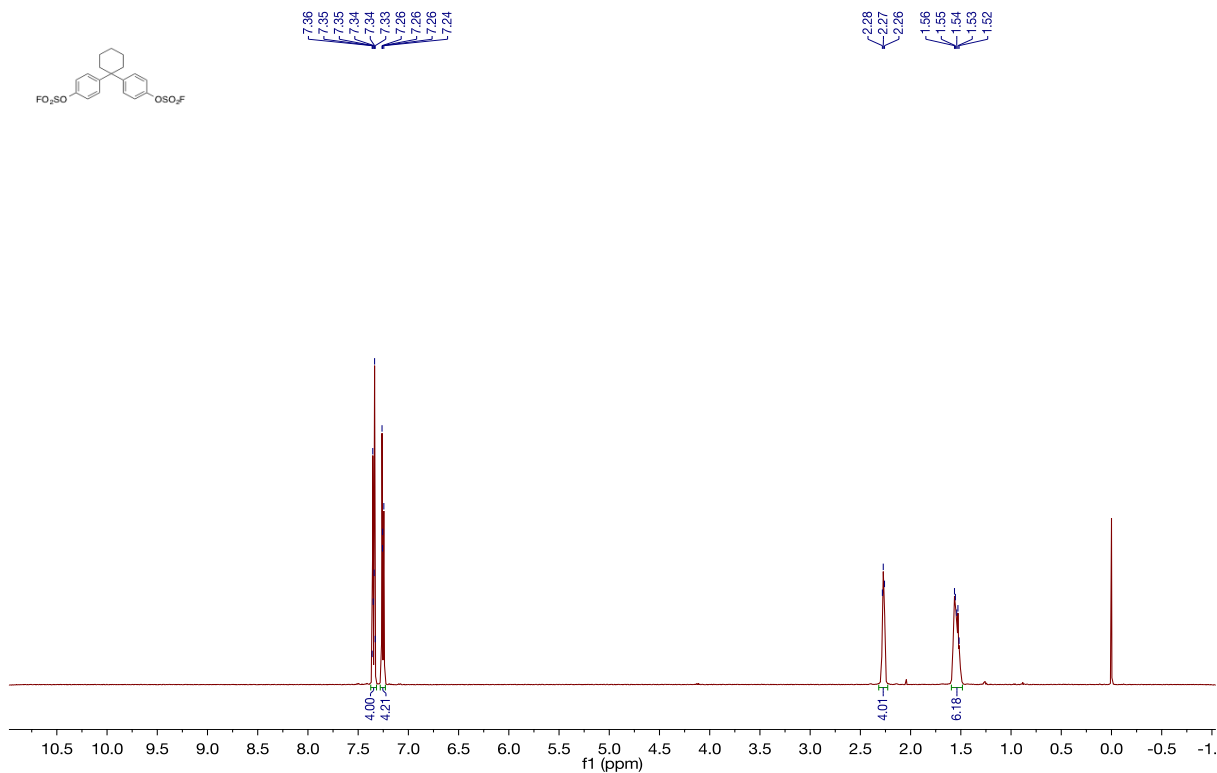

**<sup>13</sup>C NMR (B-10)**

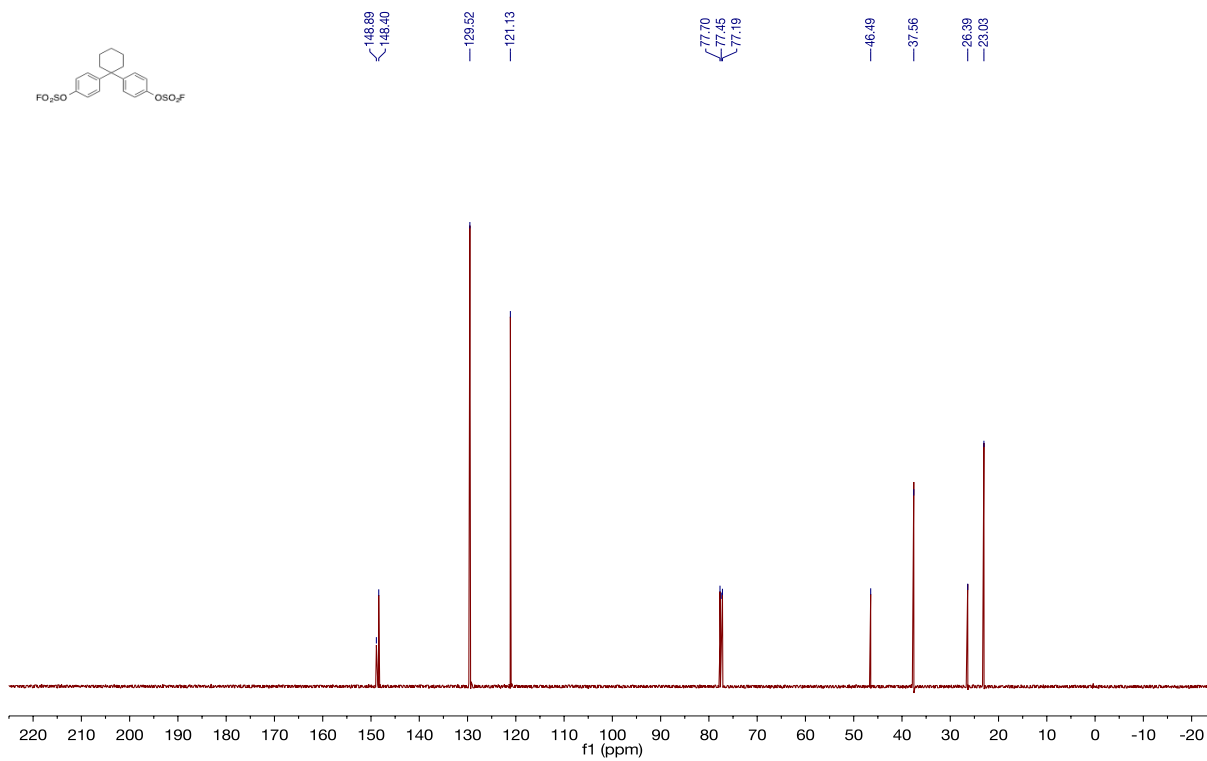

**<sup>19</sup>F NMR (B-10)**

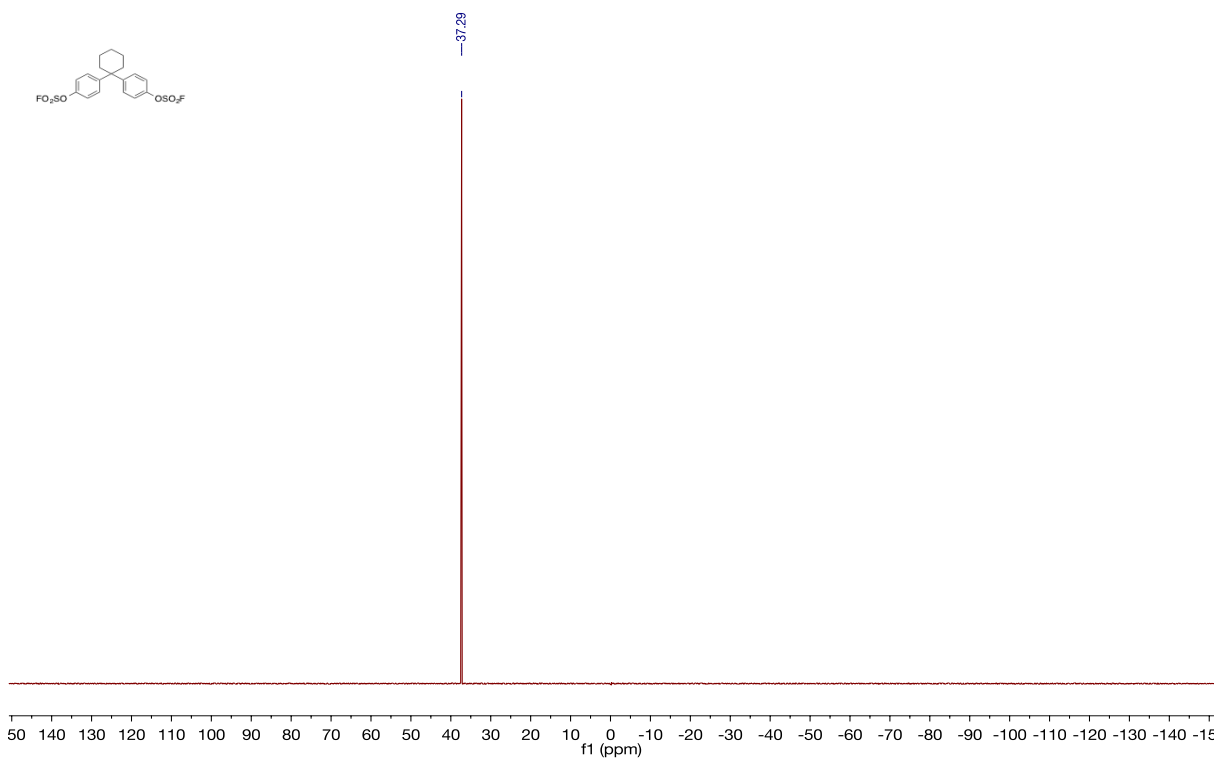

<sup>1</sup>H NMR (A-11)

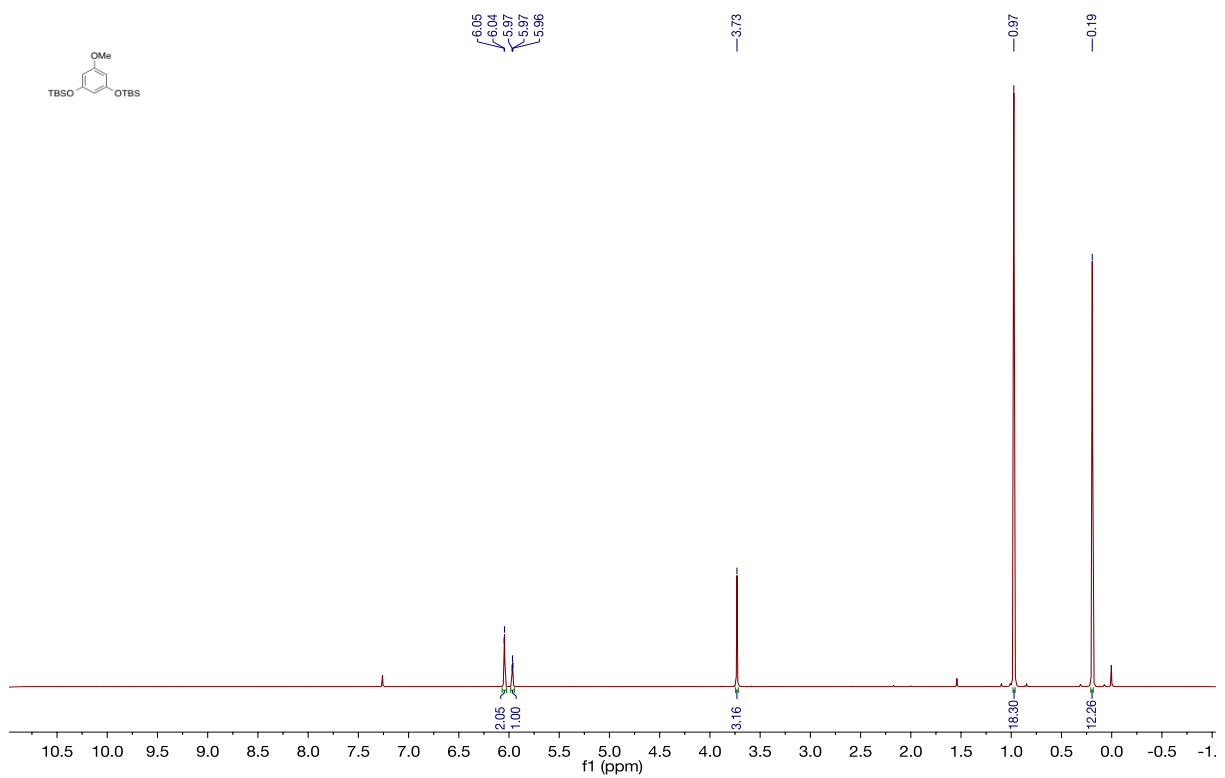

<sup>13</sup>C NMR (A-11)

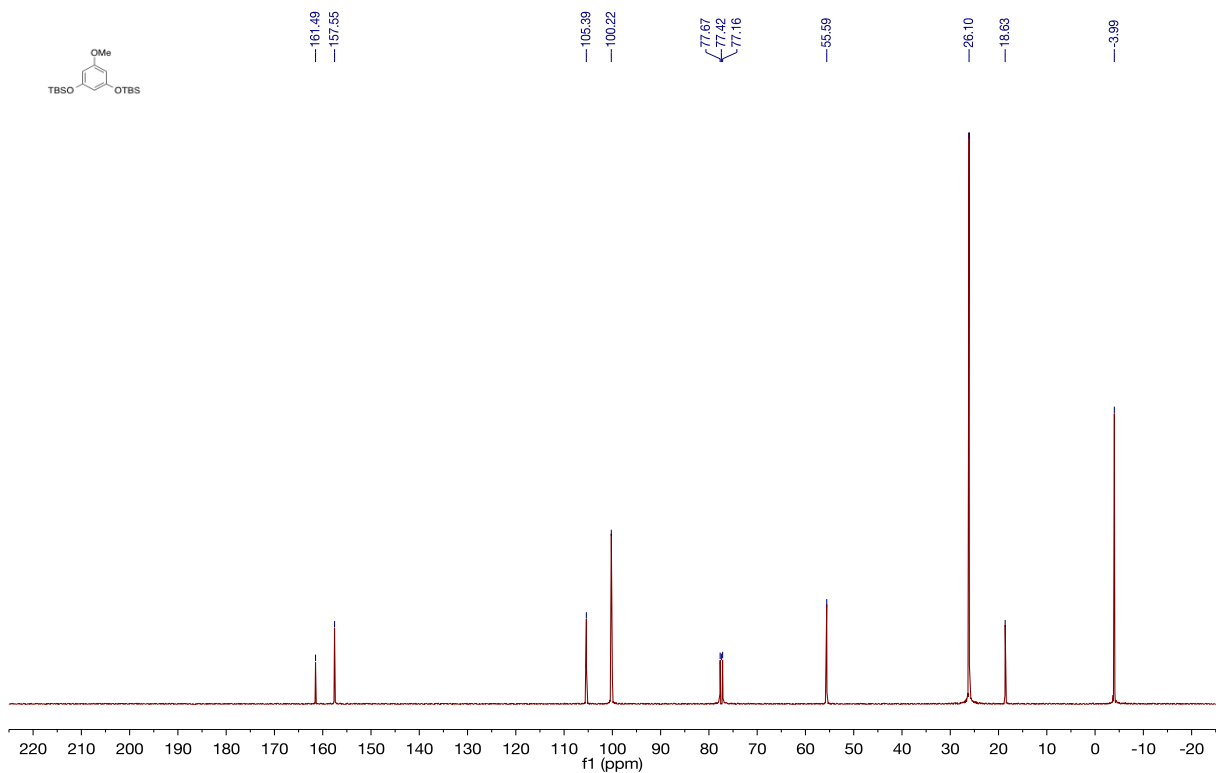

<sup>1</sup>H NMR (A-12)

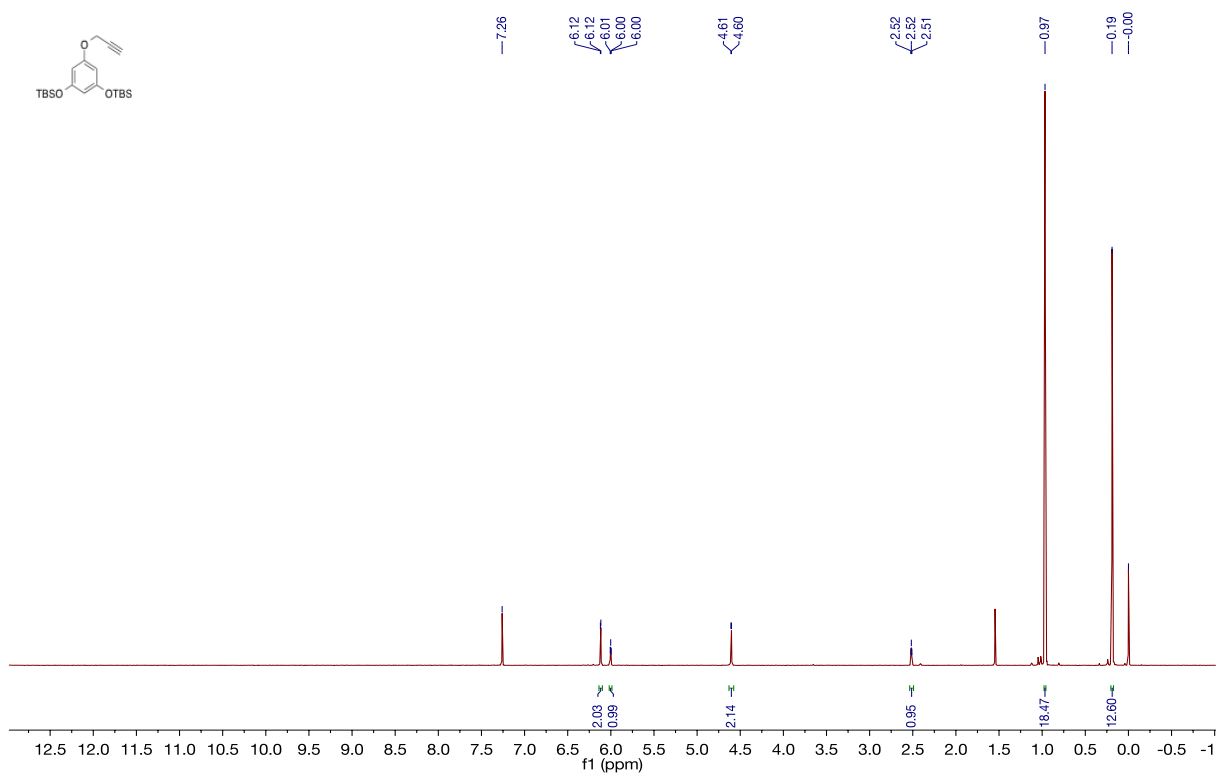

<sup>13</sup>C NMR (A-12)

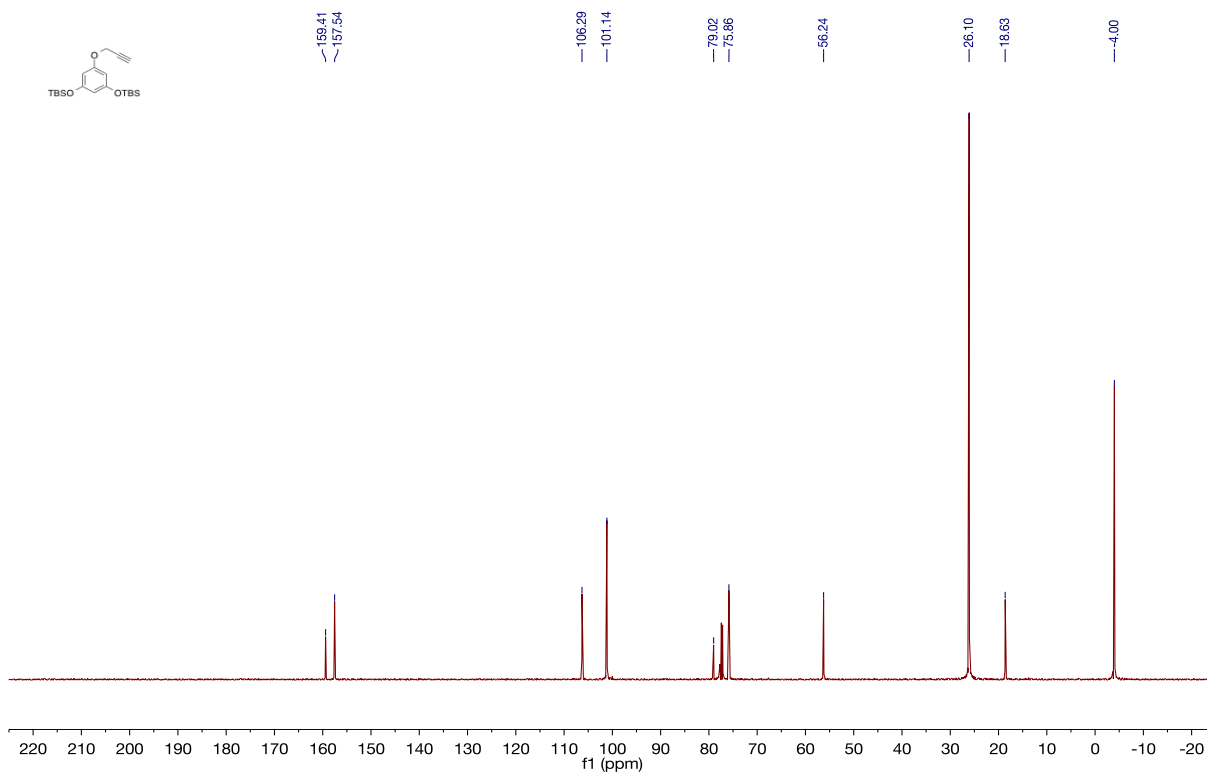



**<sup>1</sup>H NMR (B-13)**

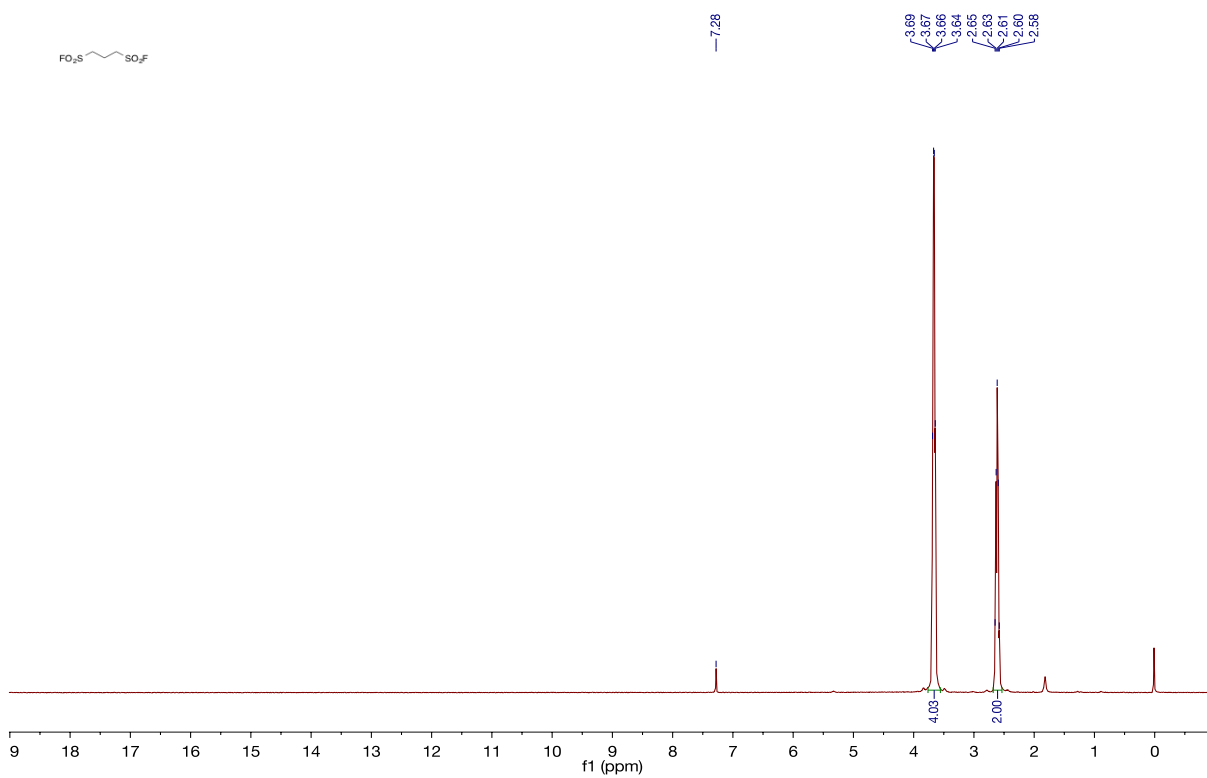

**<sup>13</sup>C NMR (B-13)**

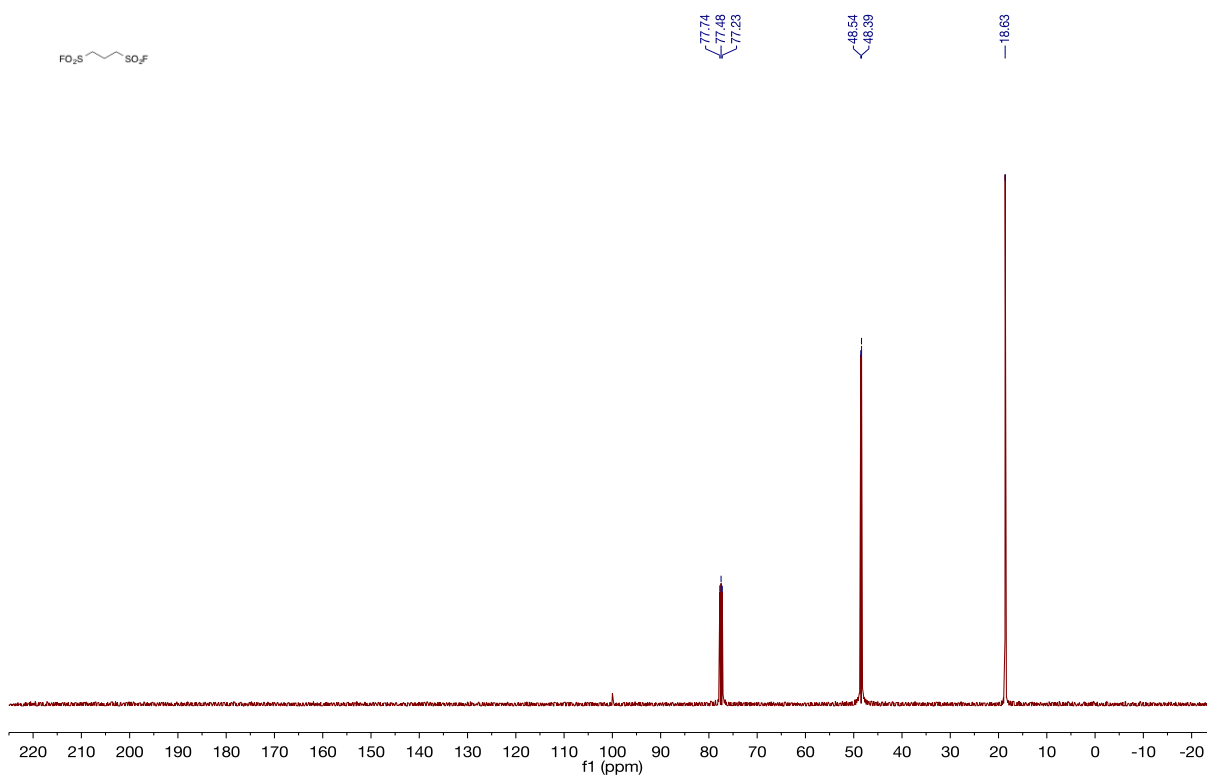

<sup>19</sup>F NMR (B-13)

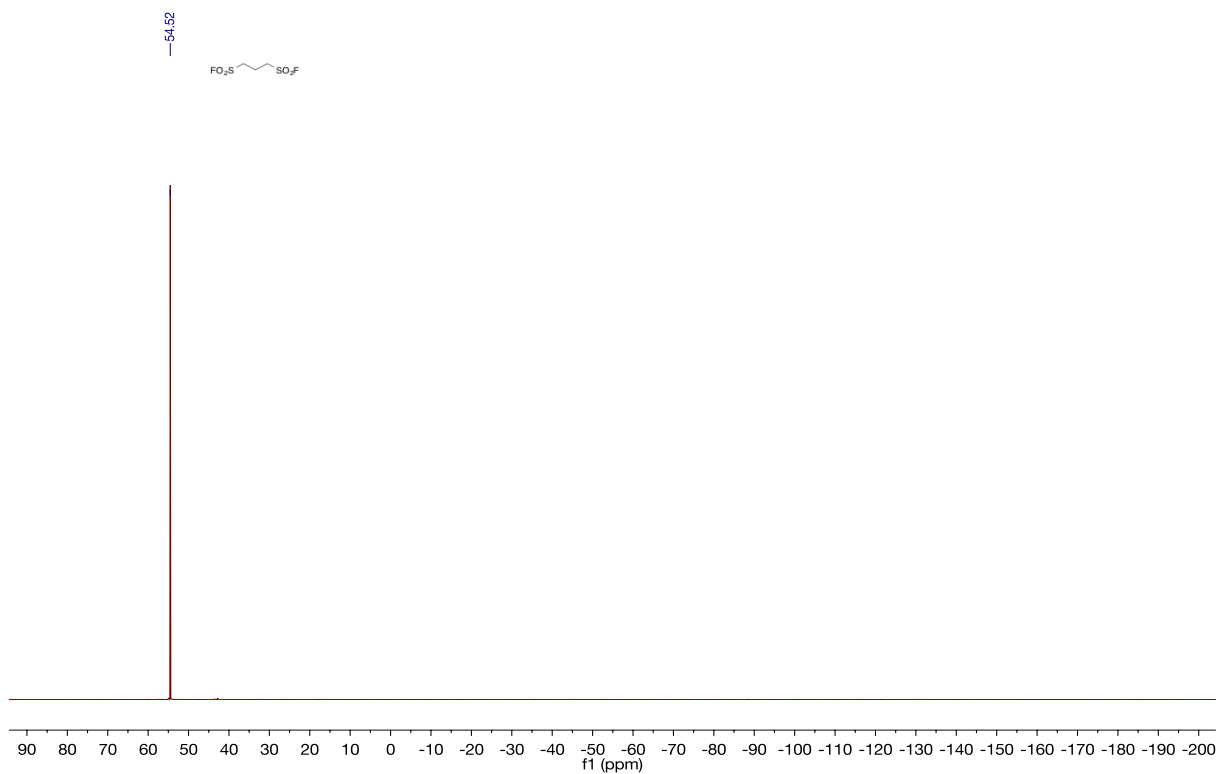

<sup>1</sup>H NMR (B-14)

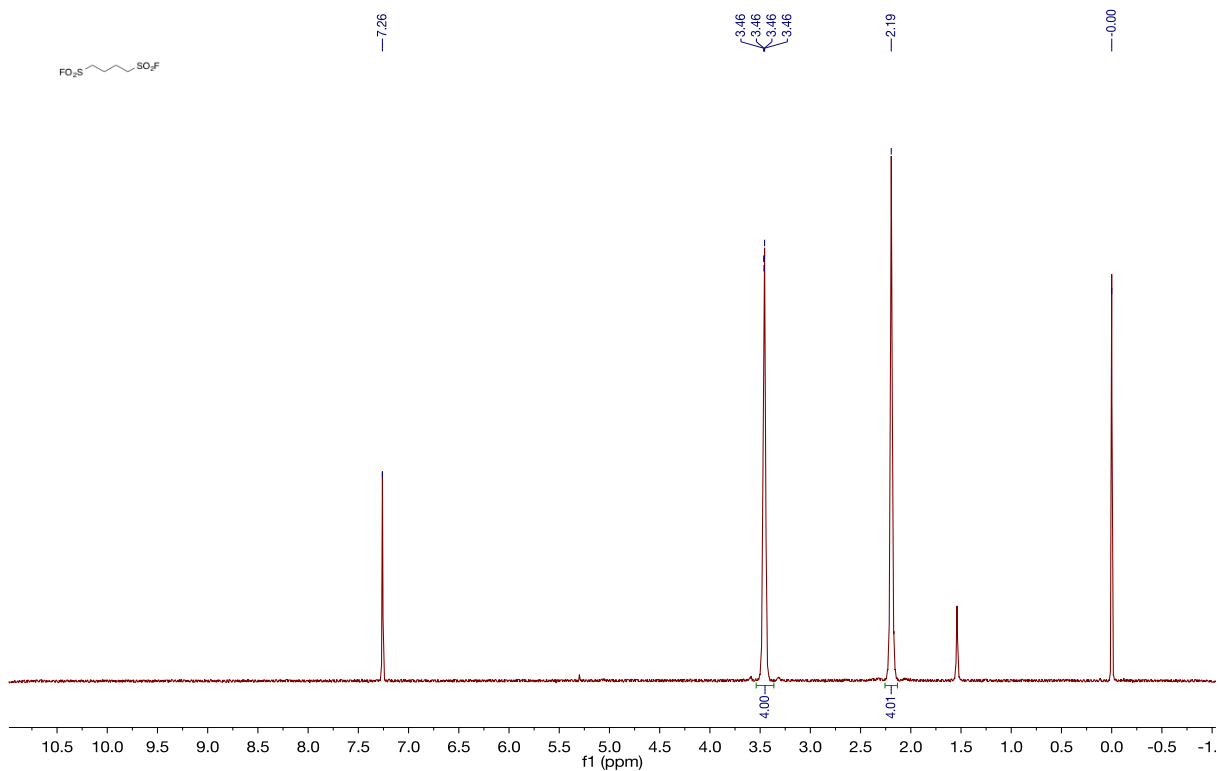

<sup>13</sup>C NMR (B-14)

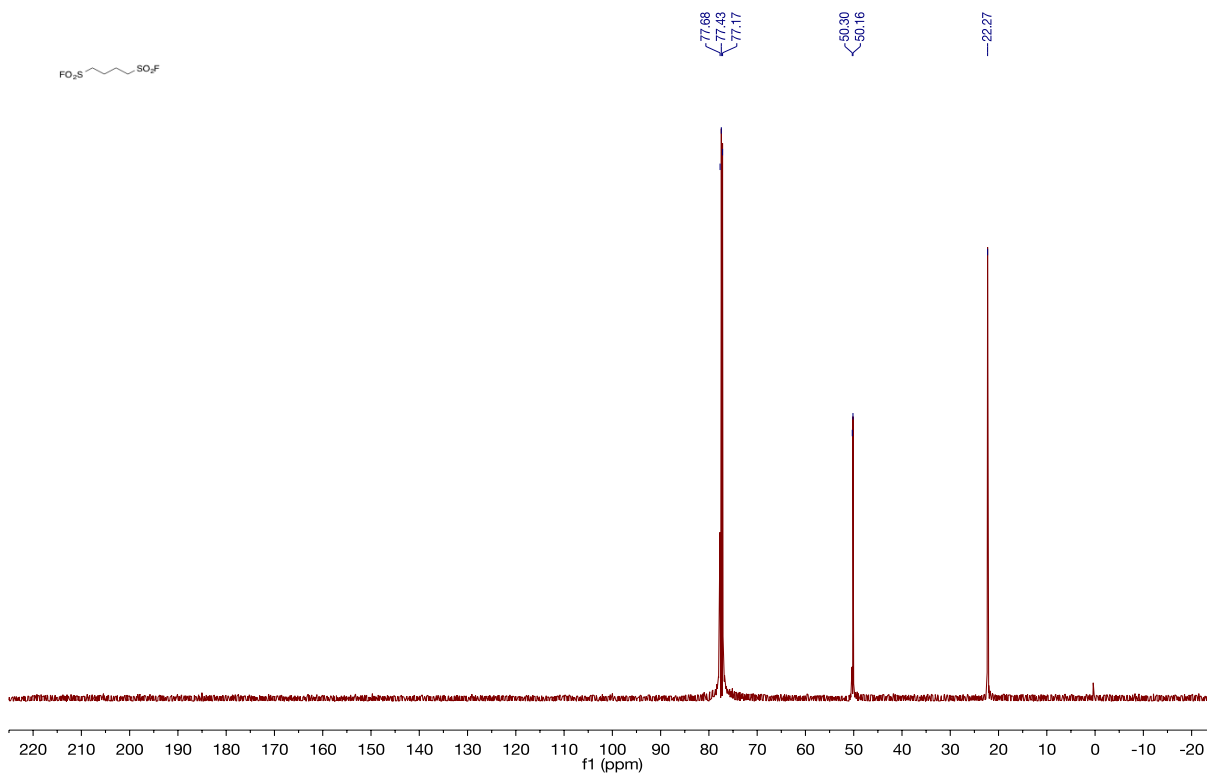

<sup>19</sup>F NMR (B-14)

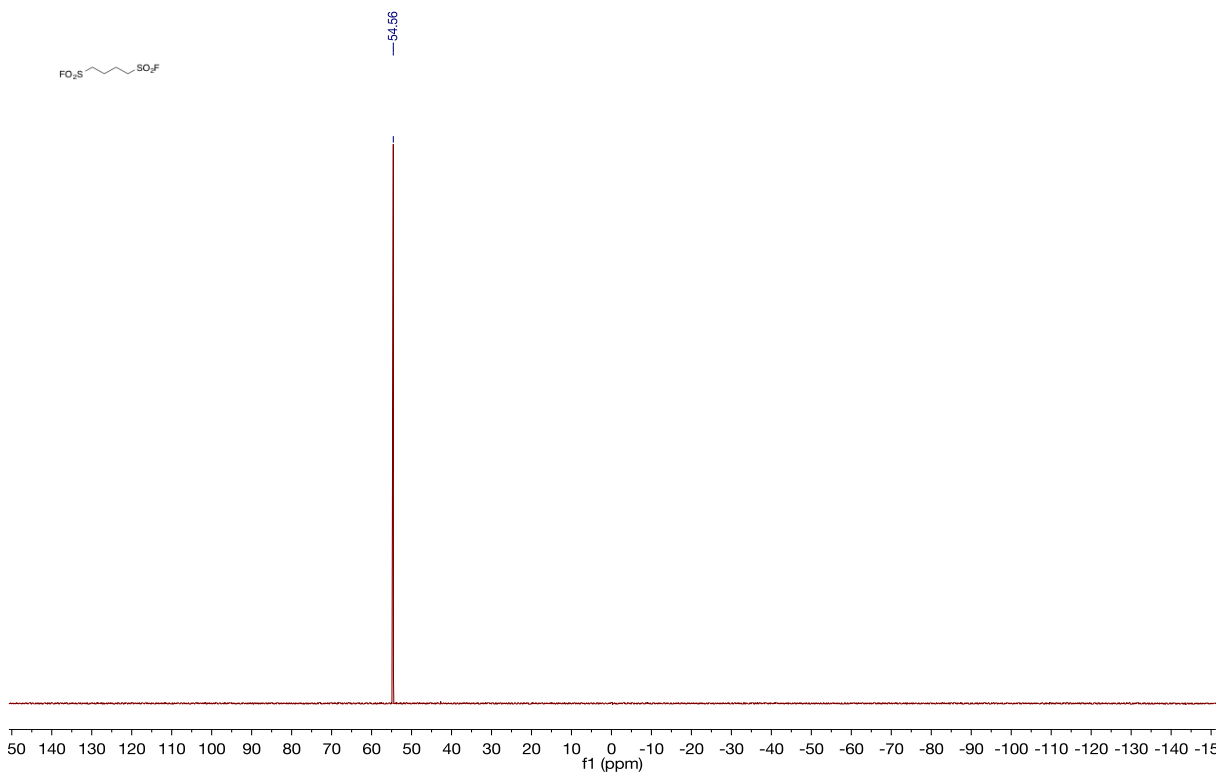

<sup>1</sup>H NMR (B-15)

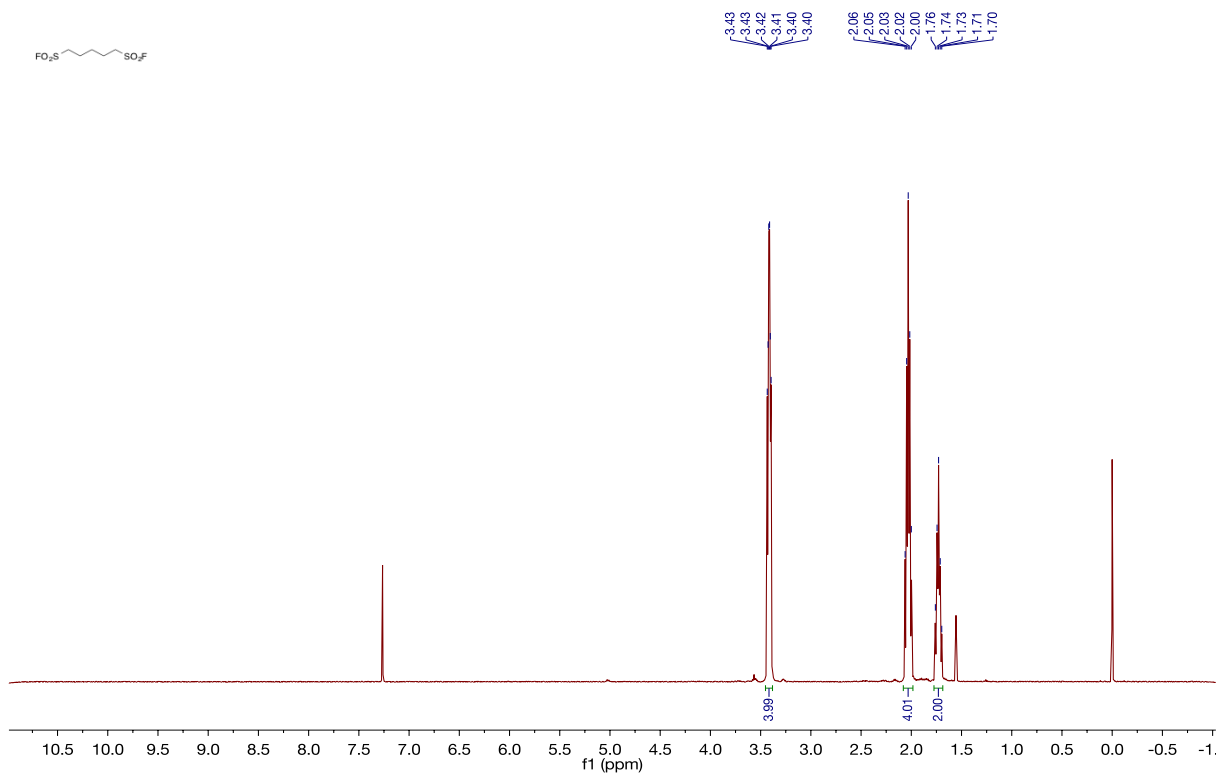

<sup>13</sup>C NMR (B-15)

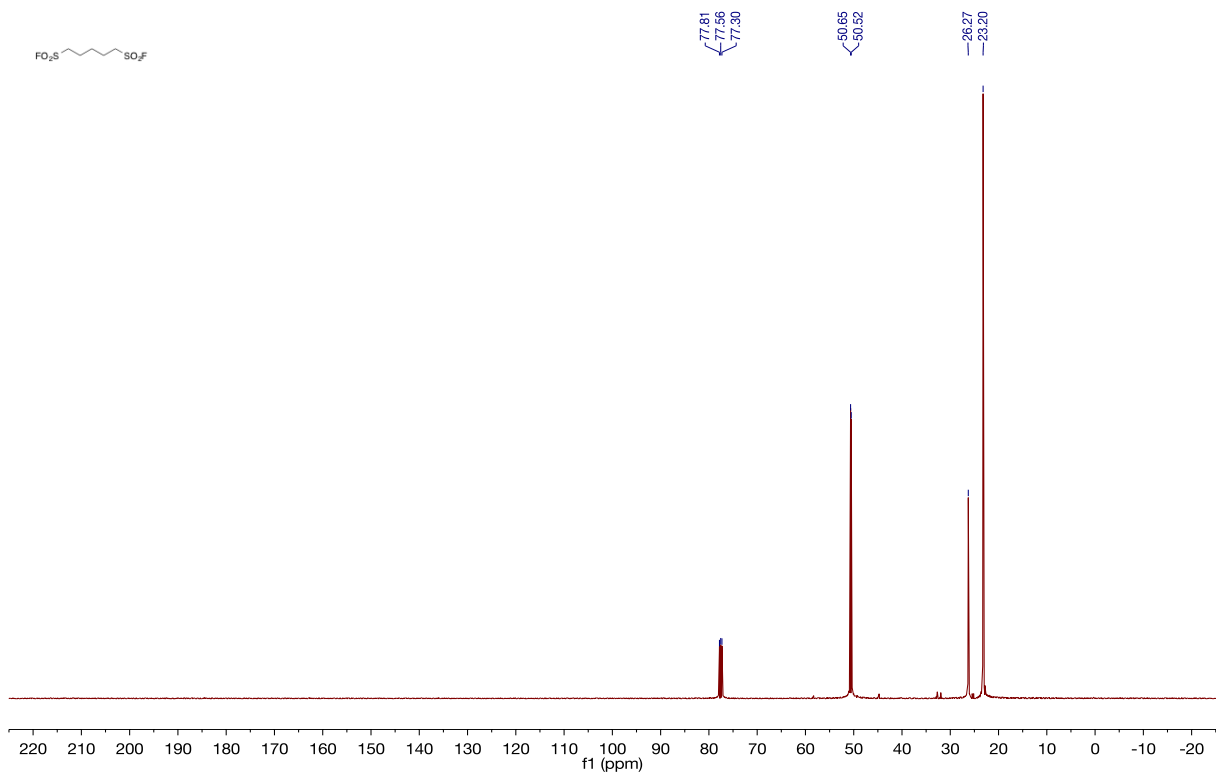

**<sup>19</sup>F NMR (B-15)**

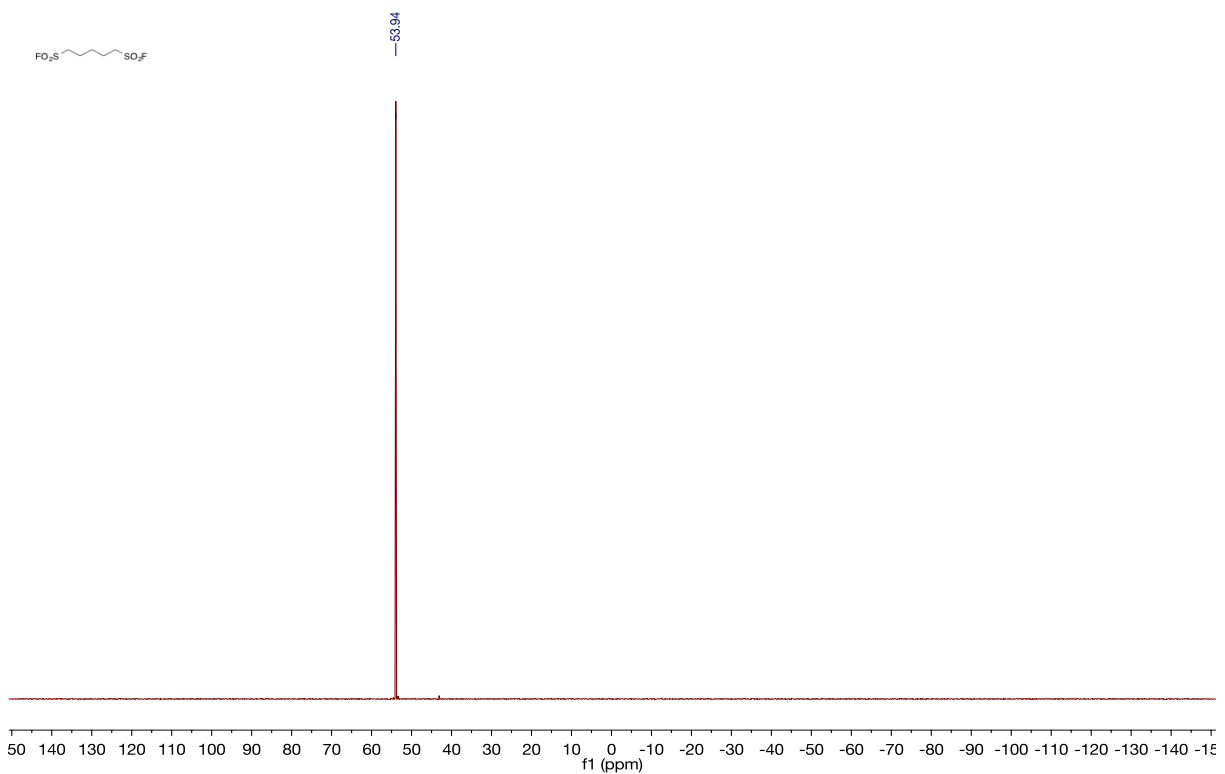

**<sup>1</sup>H NMR (P-3)**

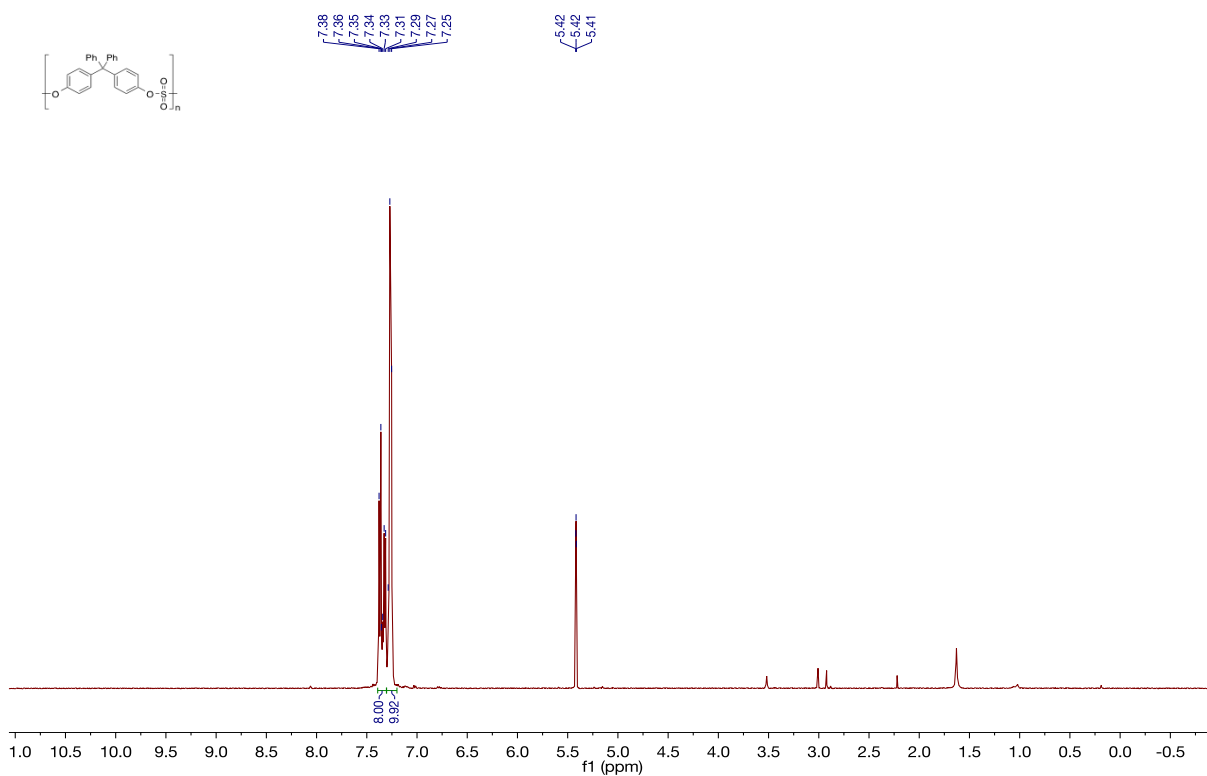

<sup>13</sup>C NMR (P-3)

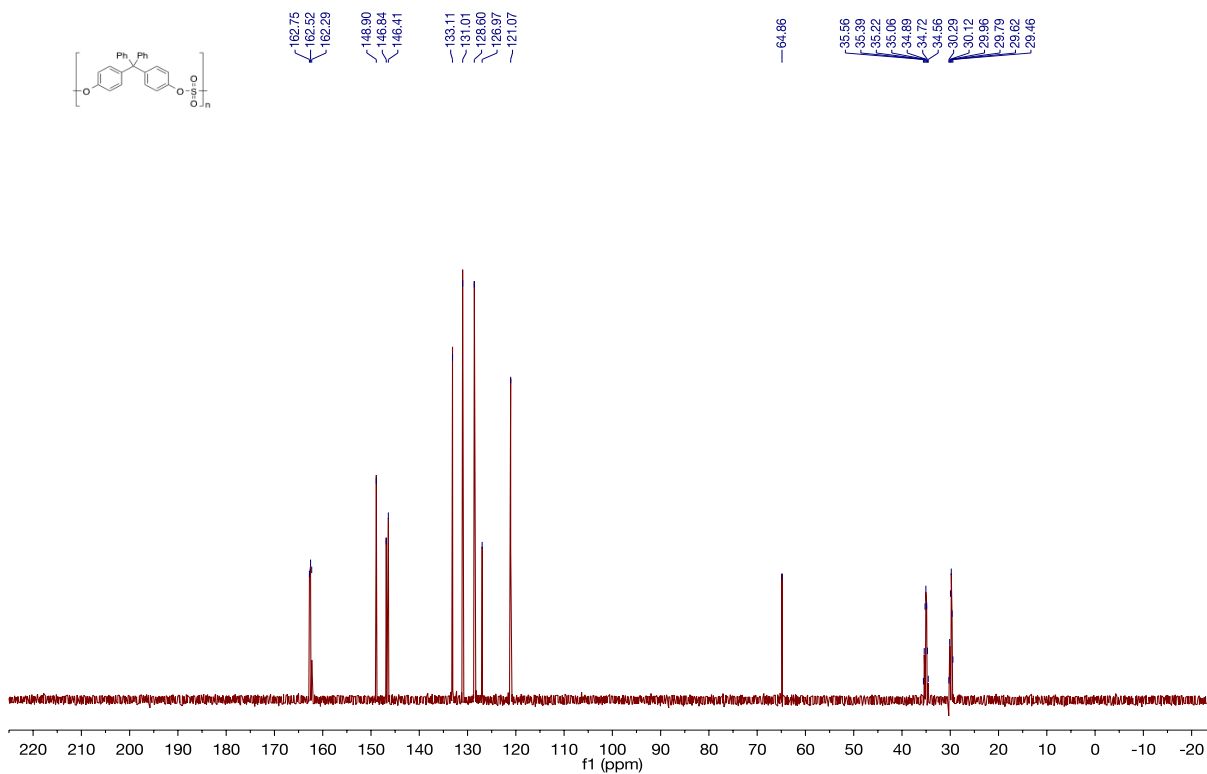

<sup>1</sup>H NMR (P-4)

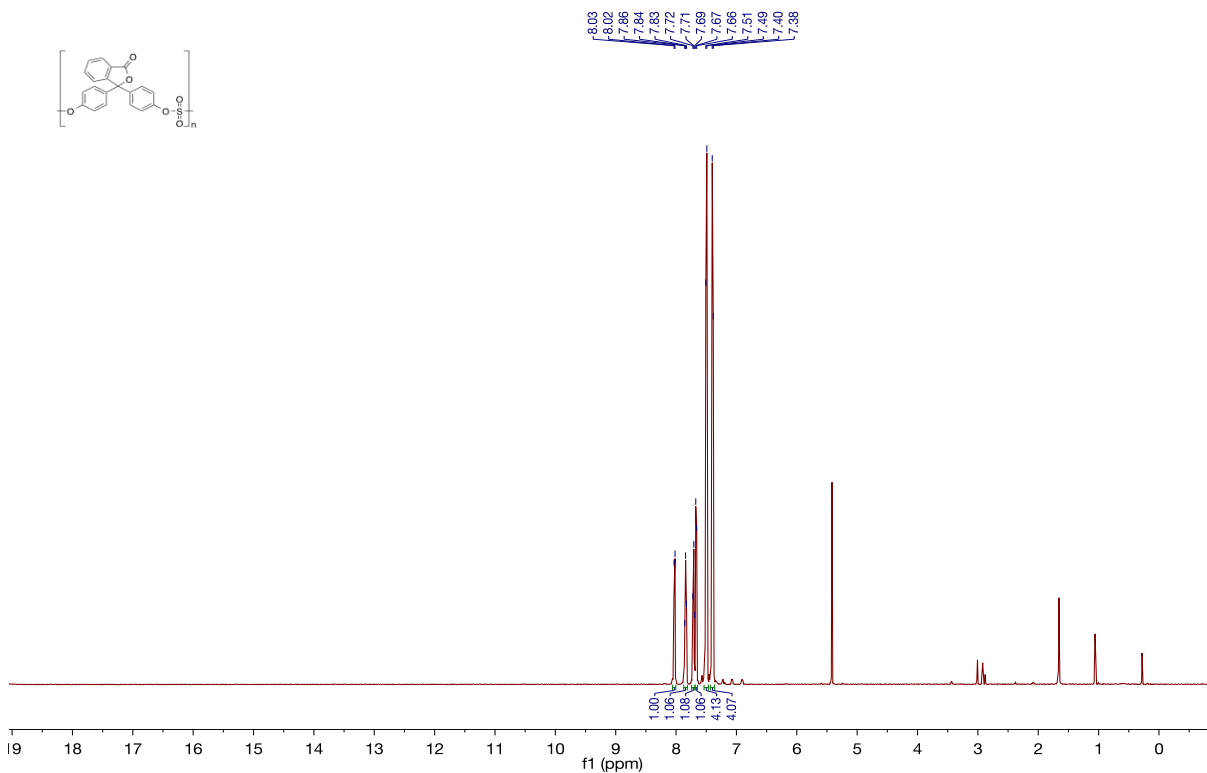

<sup>13</sup>C NMR (P-4)

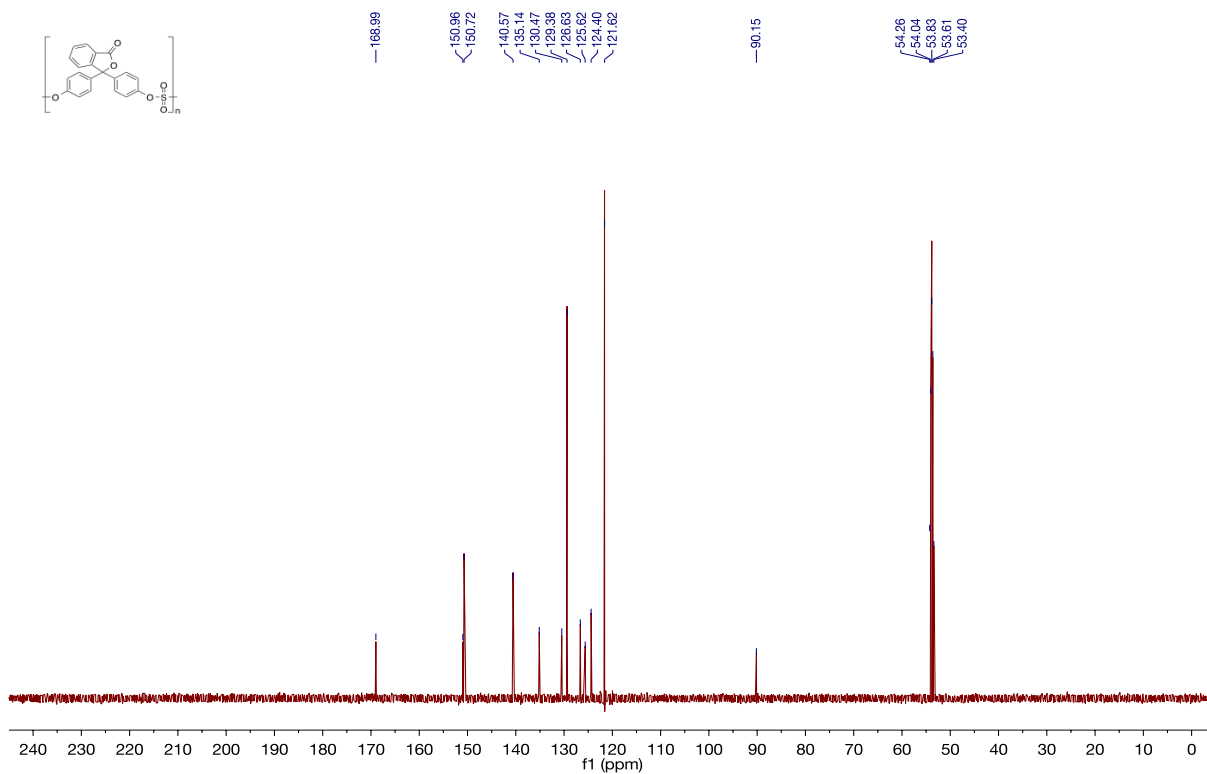

<sup>1</sup>H NMR (P-5)

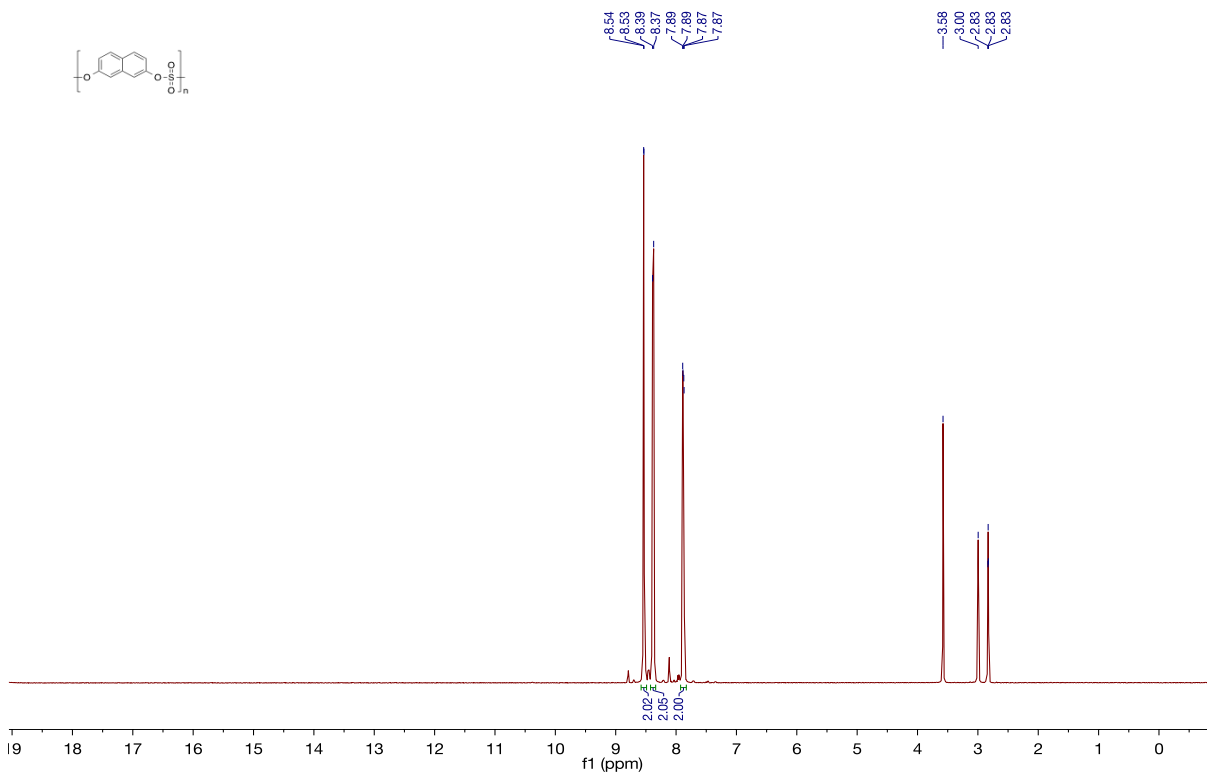

<sup>13</sup>C NMR (P-5)

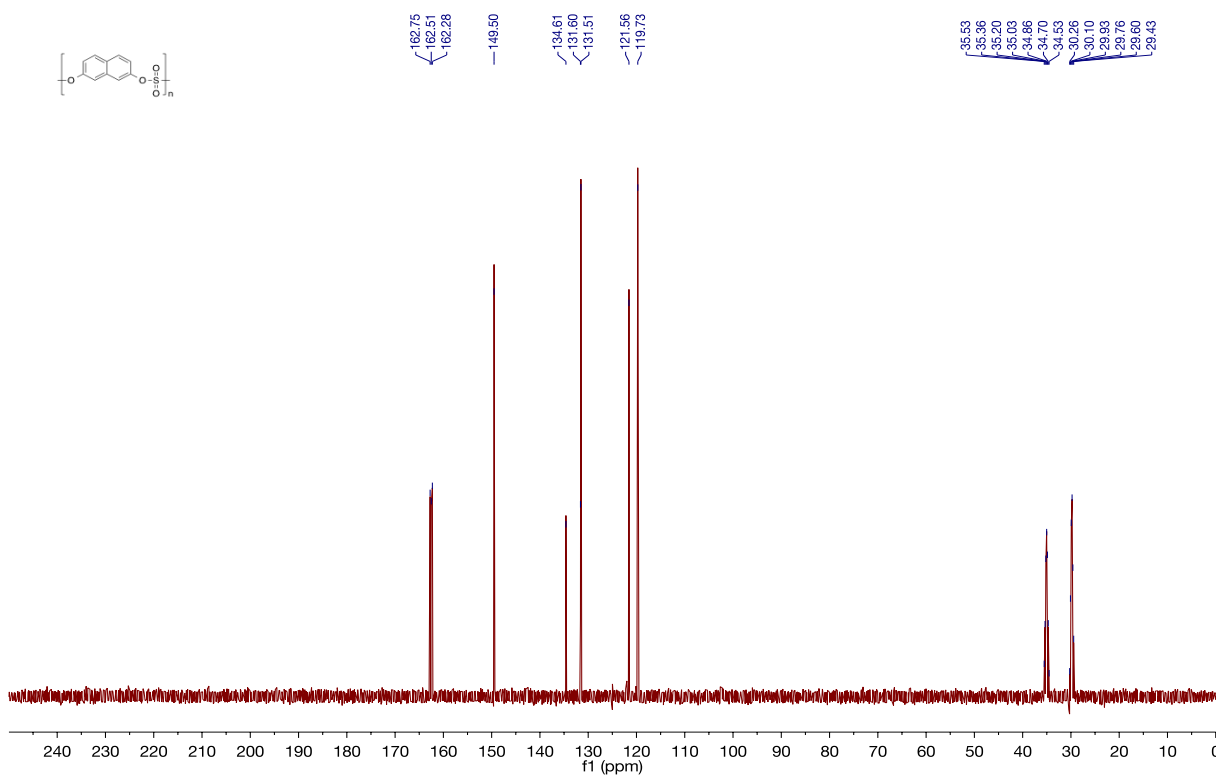

<sup>1</sup>H NMR (P-6)

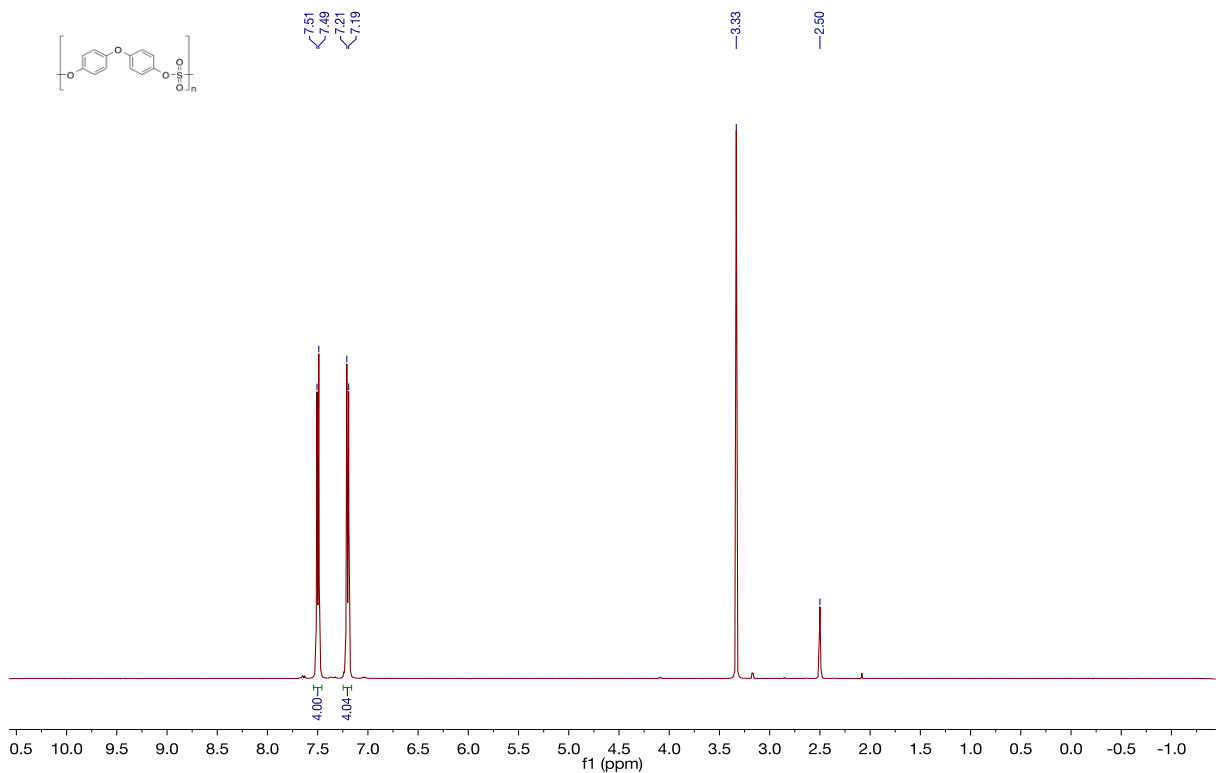



<sup>13</sup>C NMR (P-6)

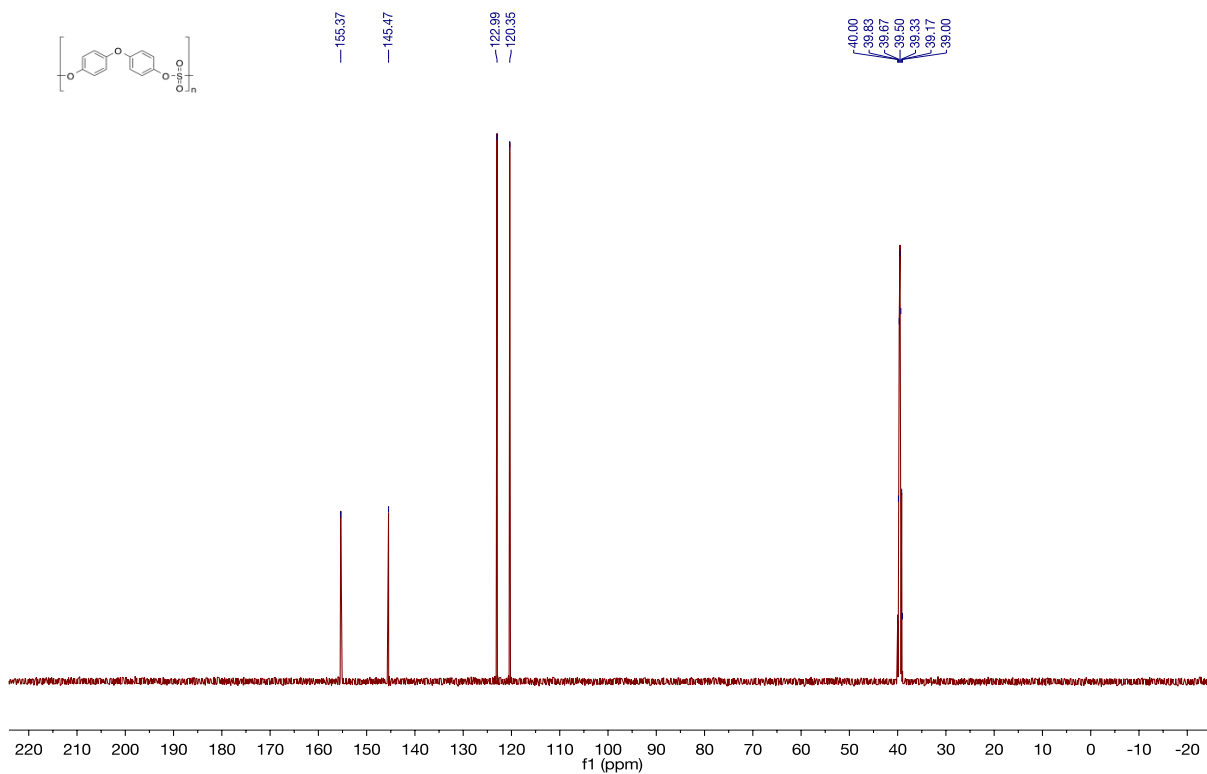

<sup>1</sup>H NMR (P-7)

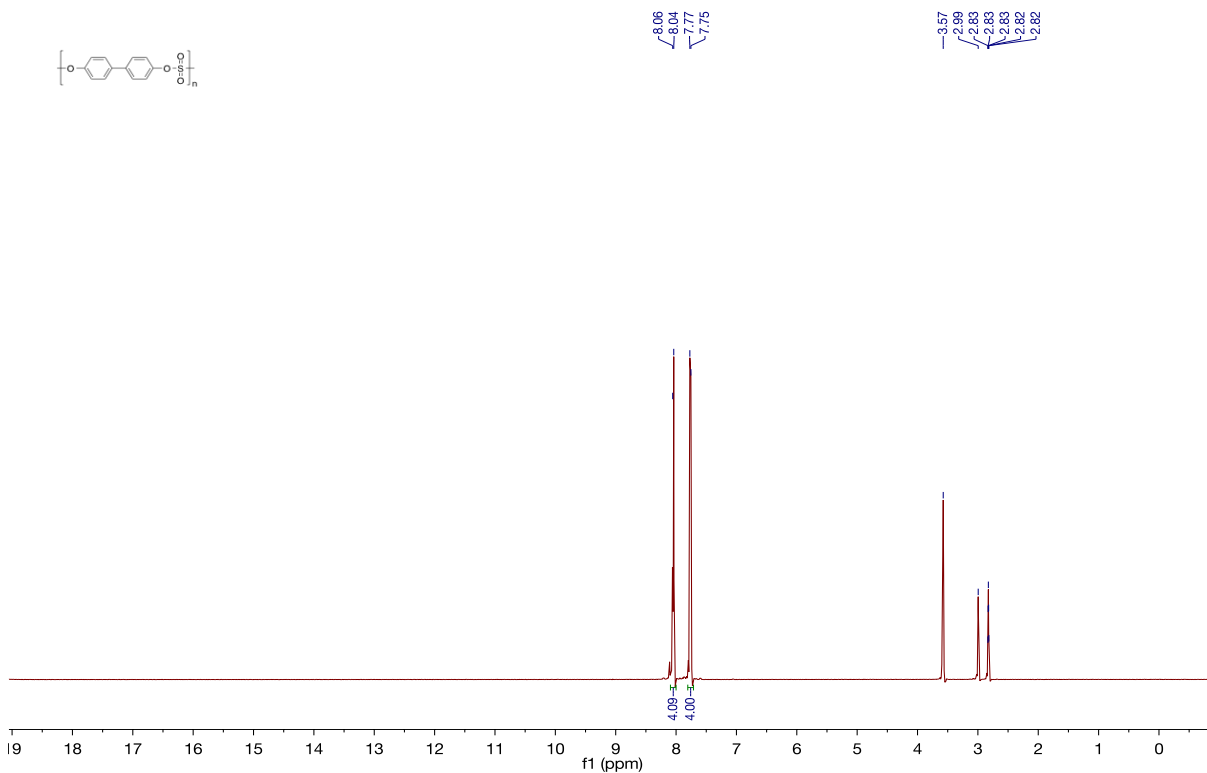

<sup>13</sup>C NMR (P-7)

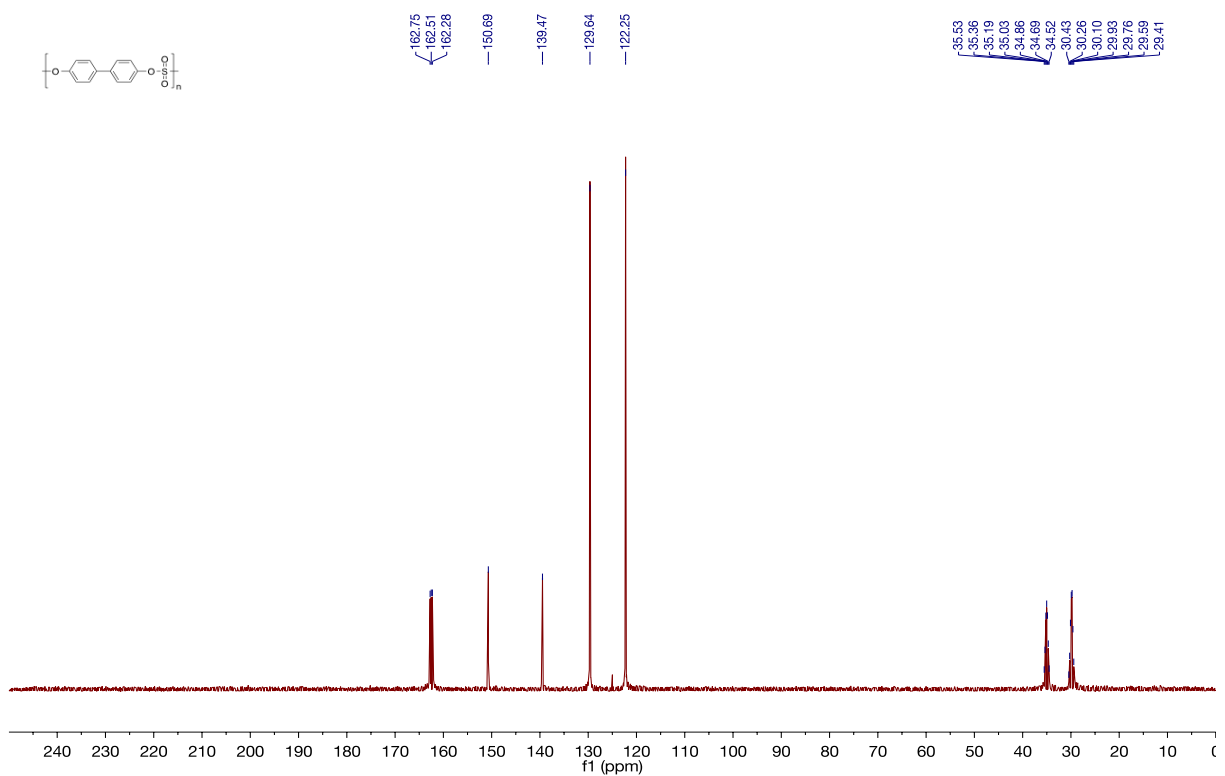

<sup>1</sup>H NMR (P-8a)

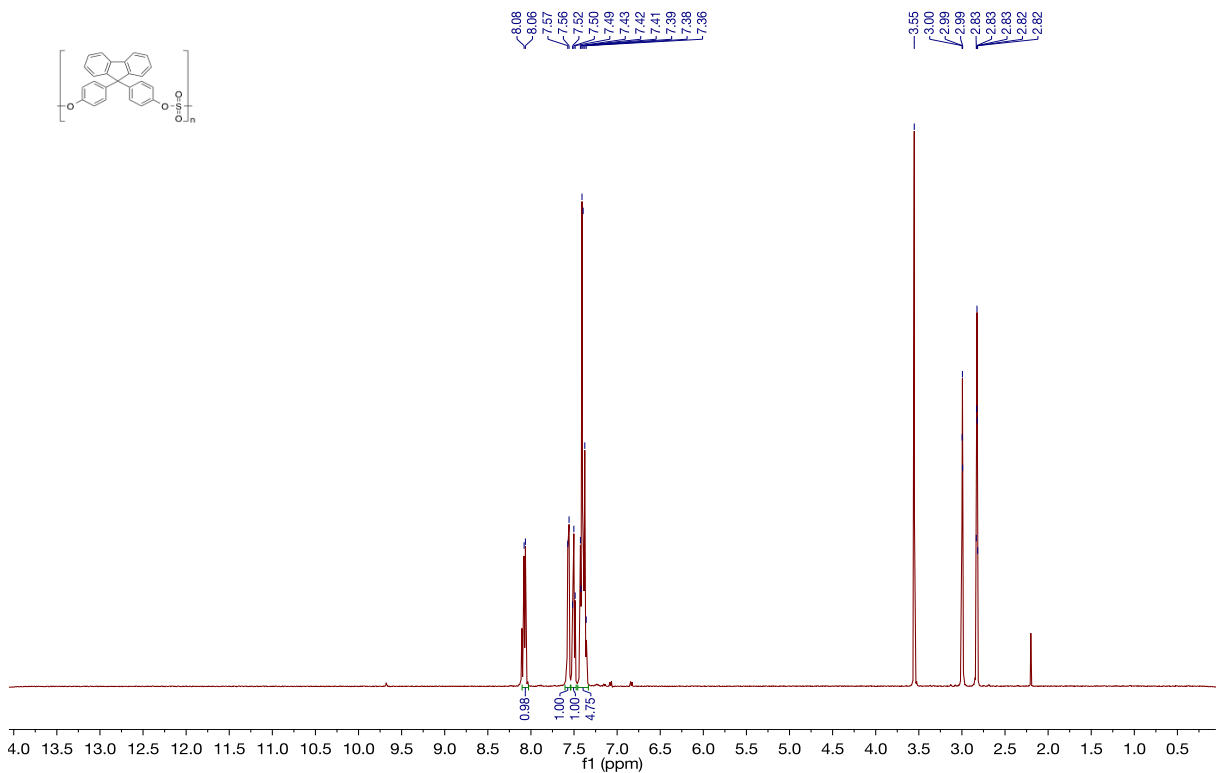

<sup>13</sup>C NMR (P-8a)

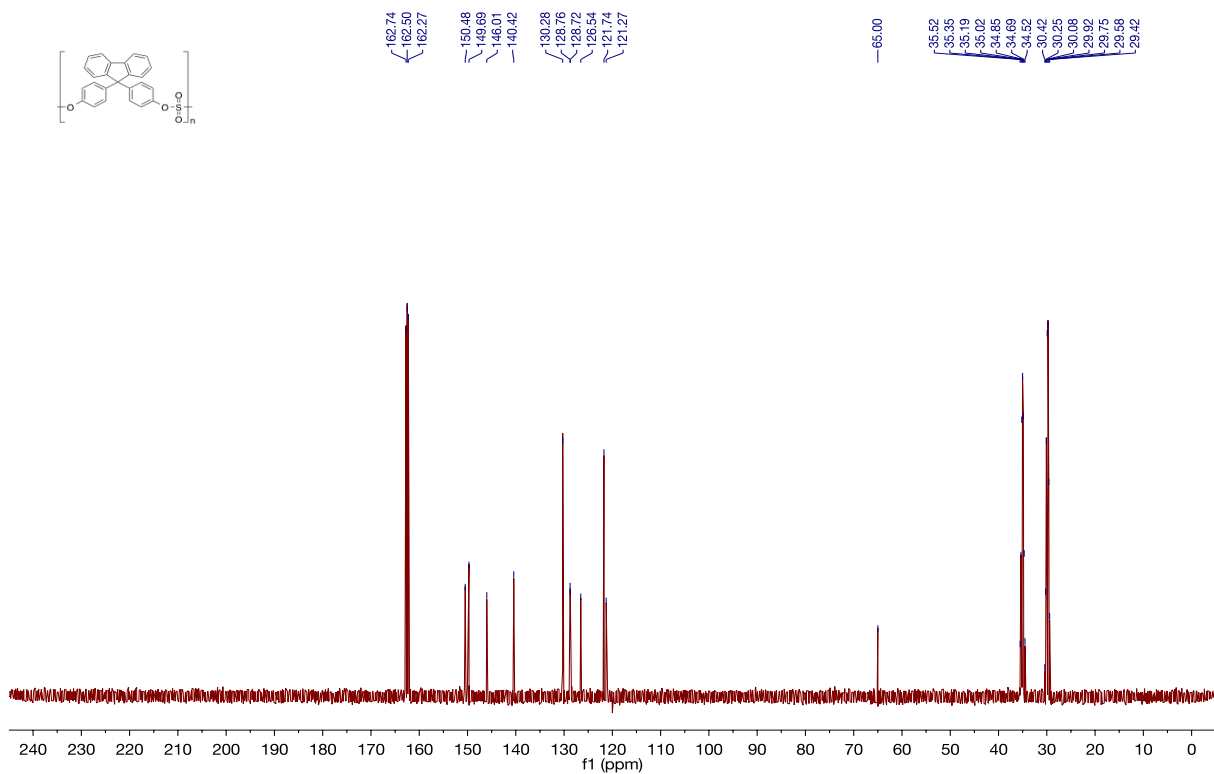

<sup>1</sup>H NMR (P-8b)

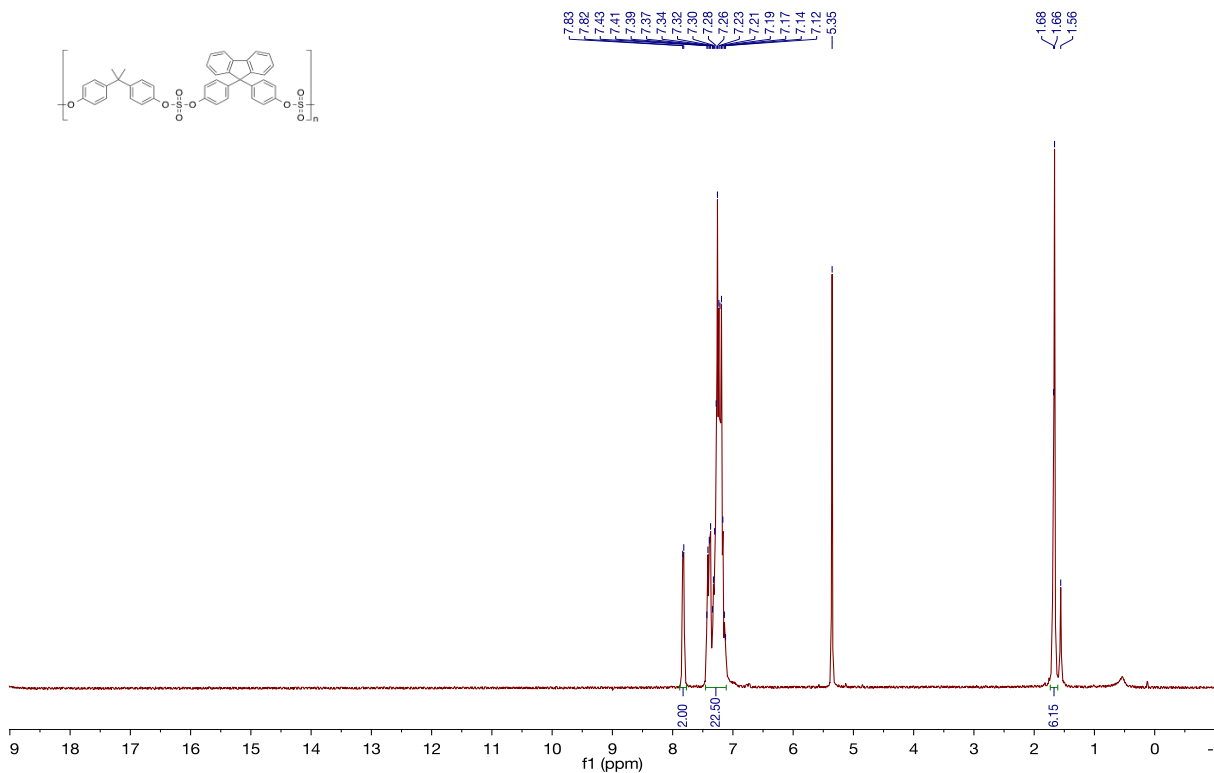

### <sup>13</sup>C NMR (P-8b)

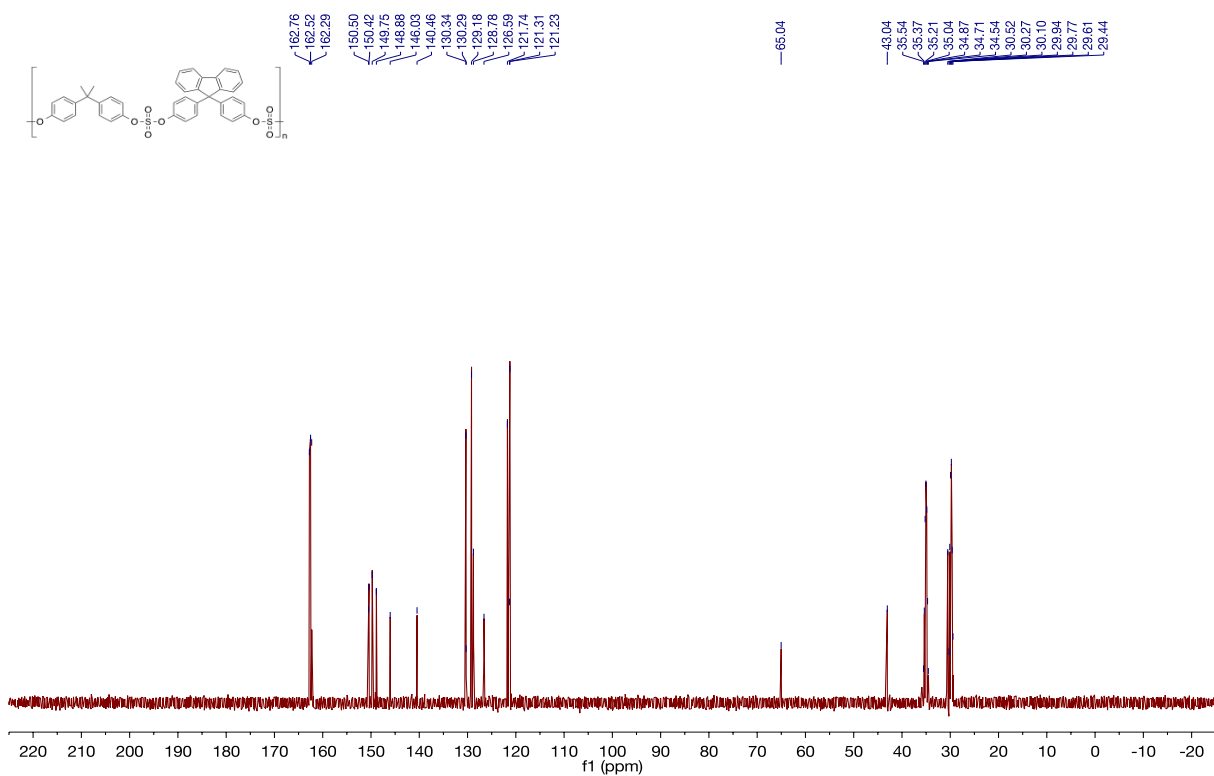

### <sup>1</sup>H NMR (P-9)

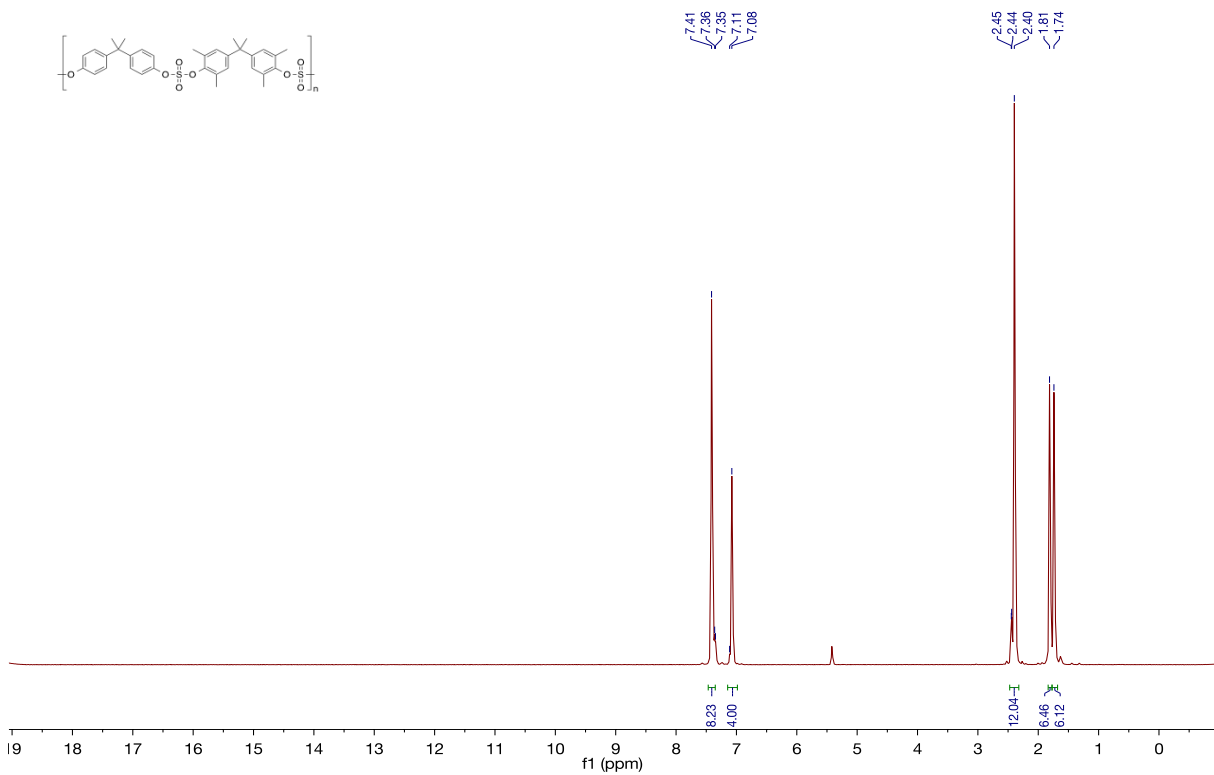

<sup>13</sup>C NMR (P-9)

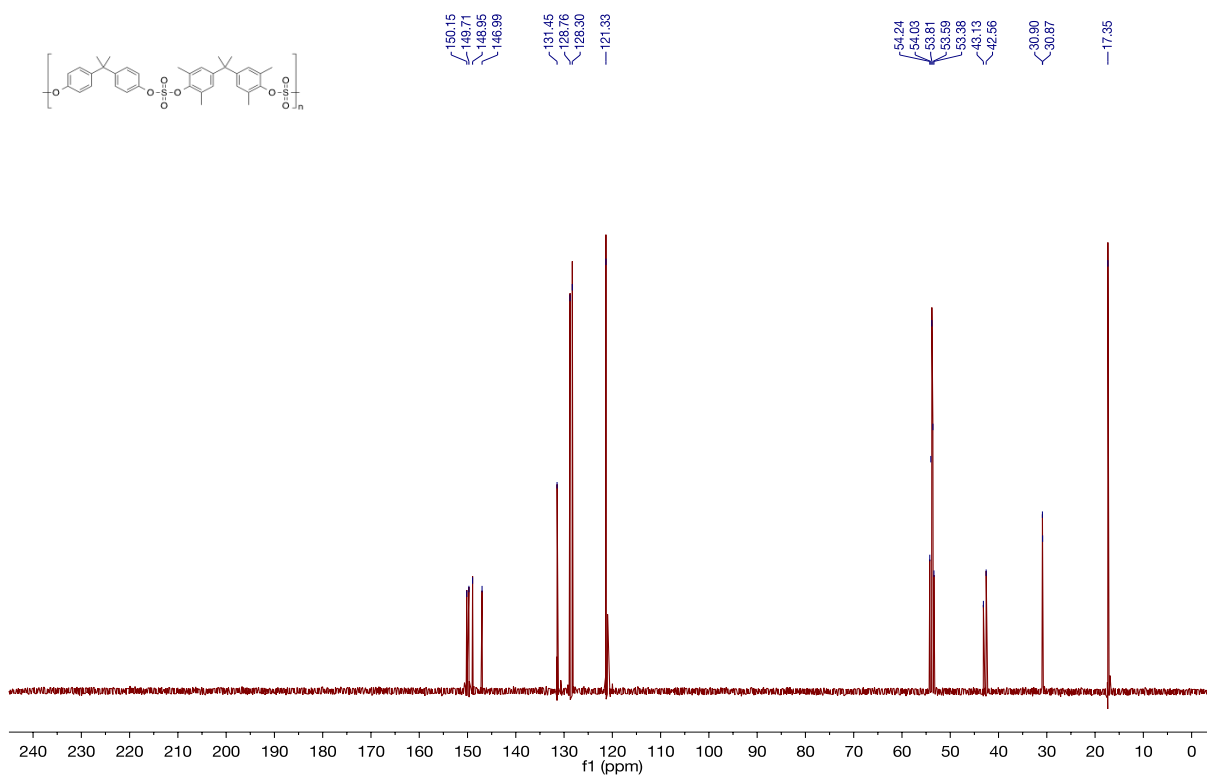

<sup>1</sup>H NMR (P-10)

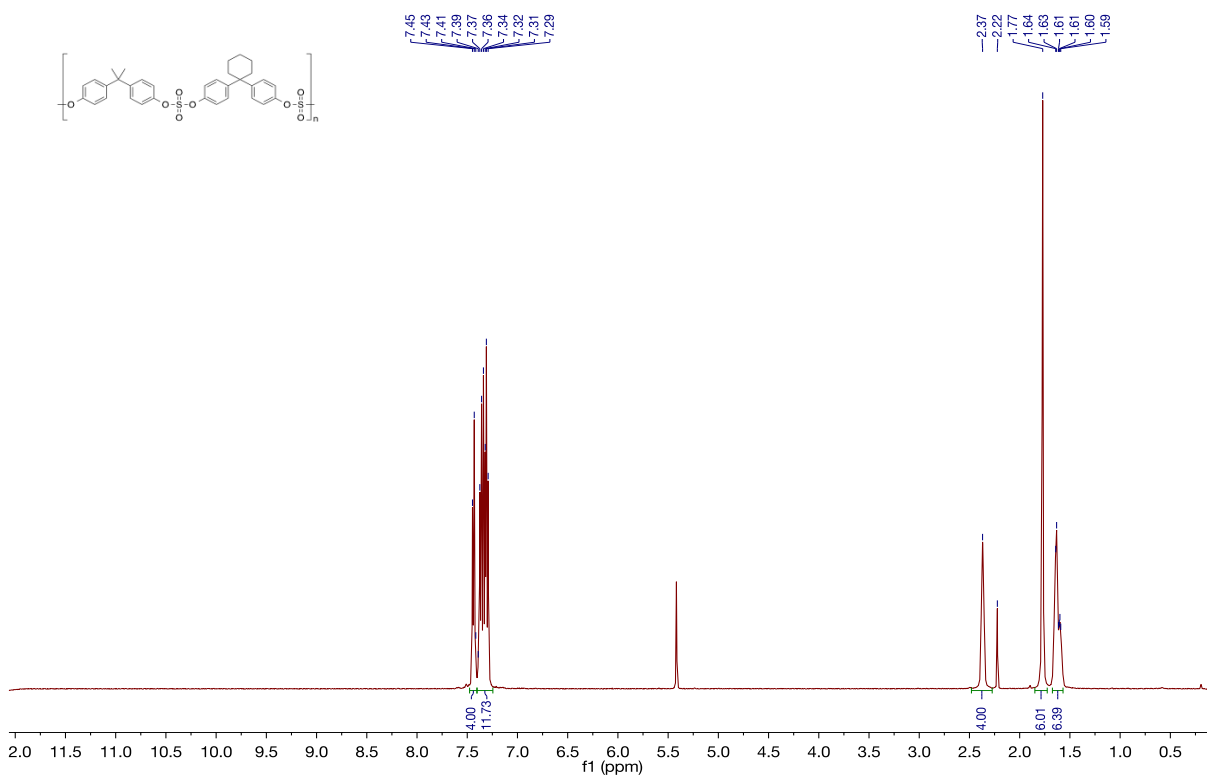

<sup>13</sup>C NMR (P-10)

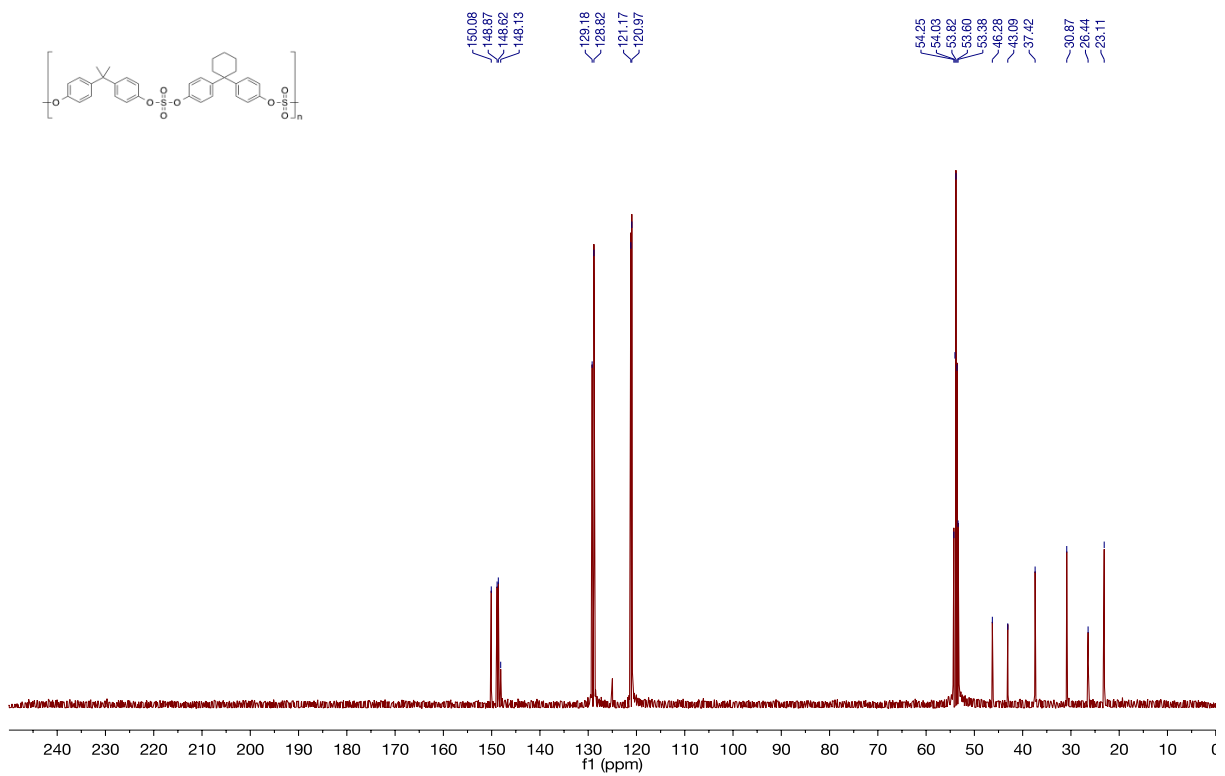

<sup>1</sup>H NMR (P-11a)

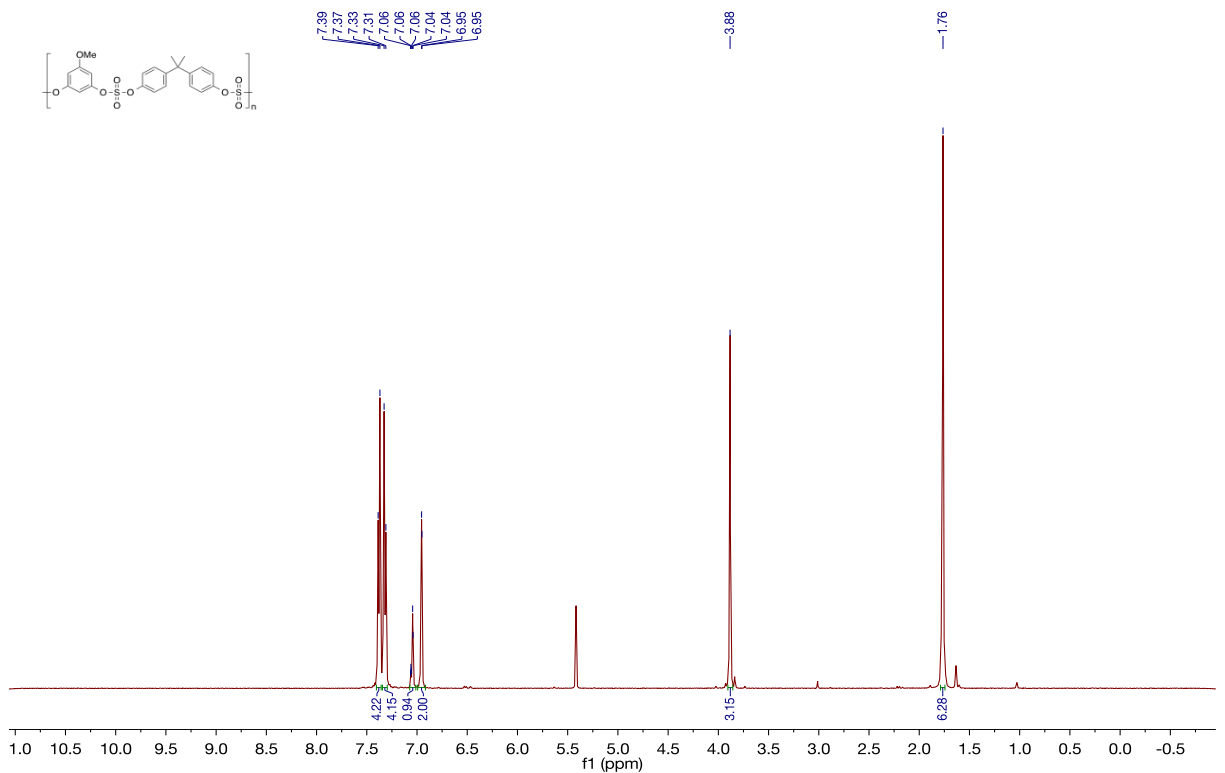

<sup>13</sup>C NMR (P-11a)

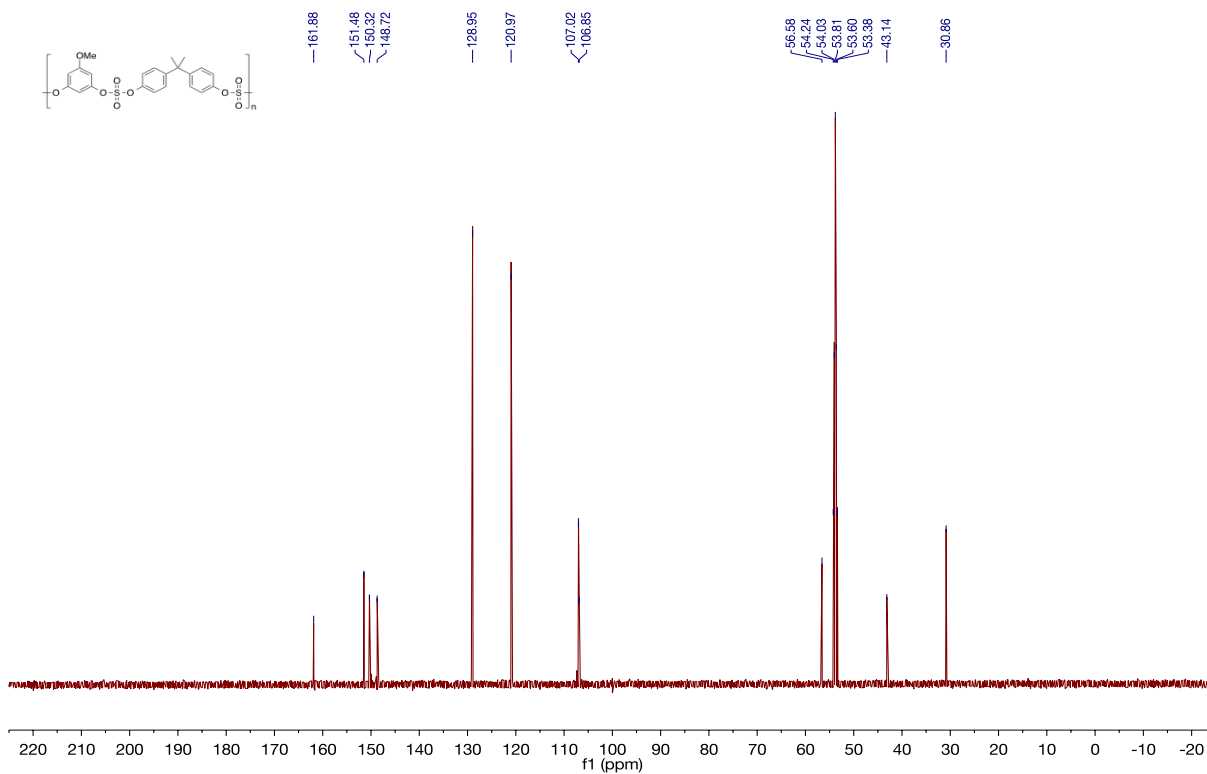

<sup>1</sup>H NMR (P-11b)

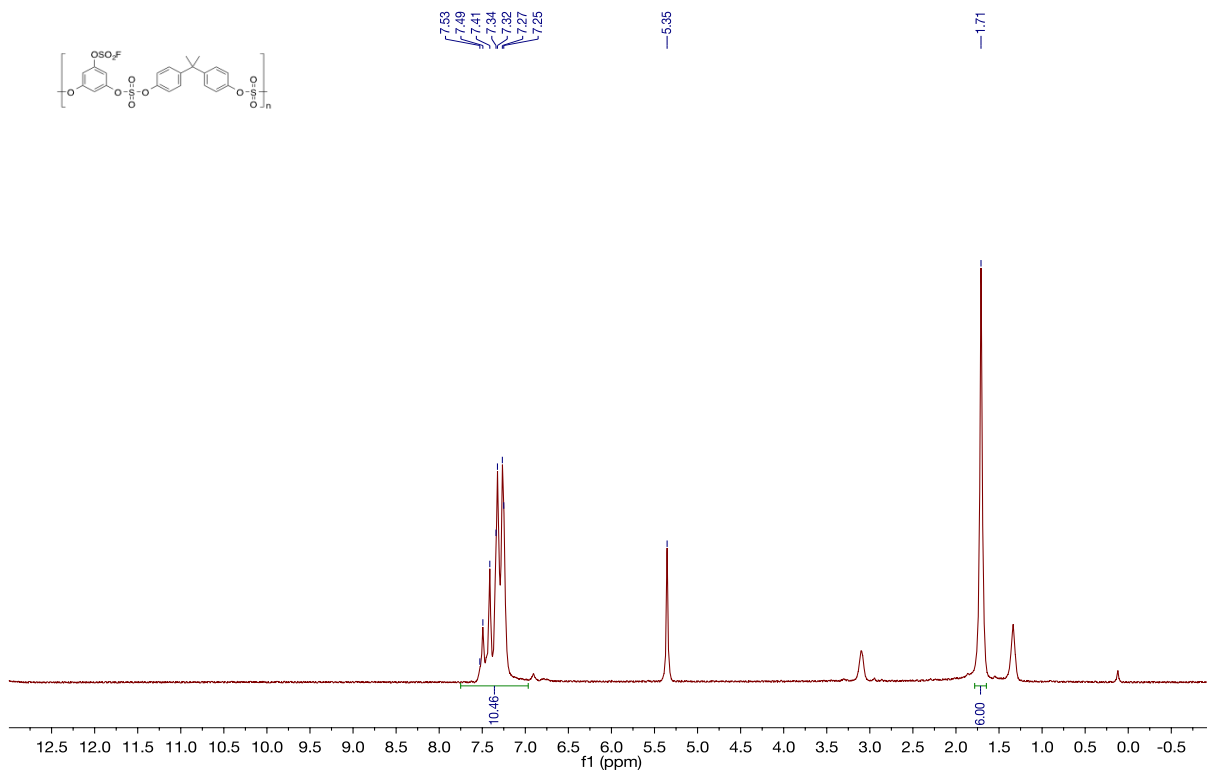

<sup>13</sup>C NMR (P-11b)

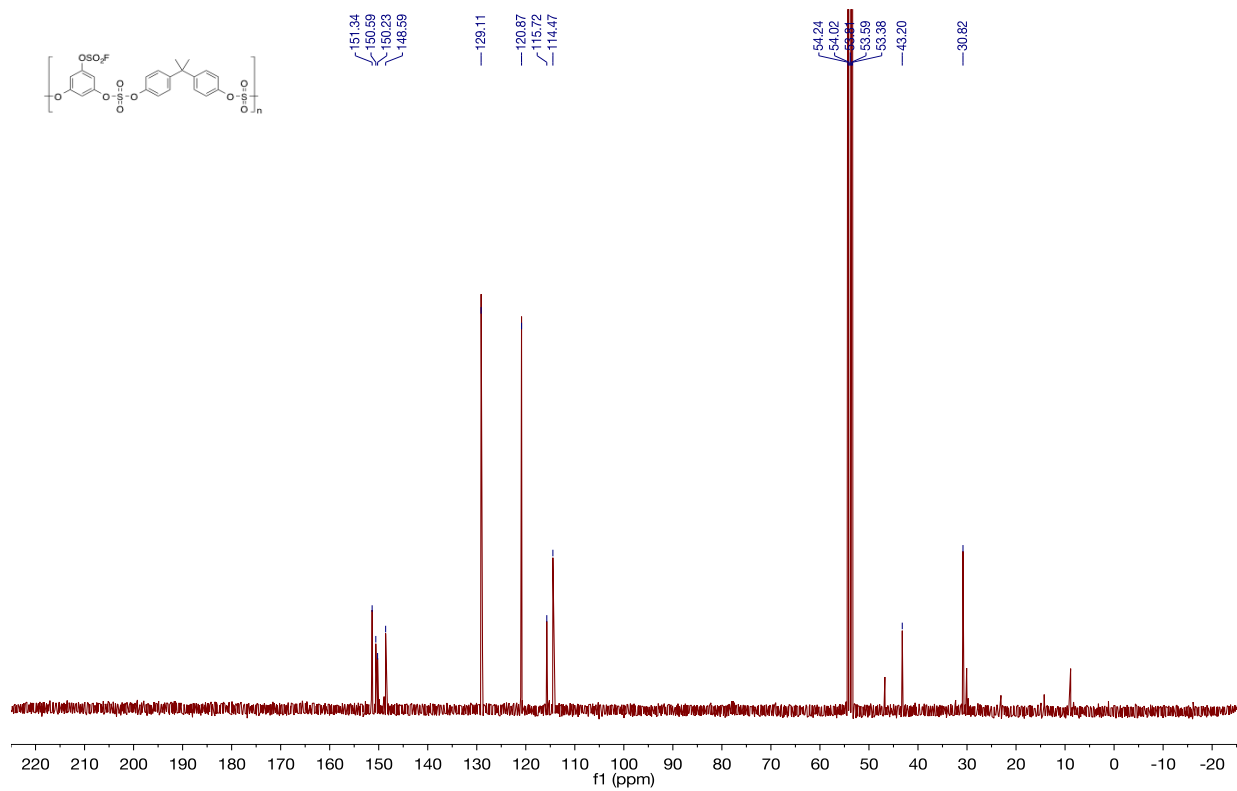

<sup>19</sup>F NMR (P-11b)

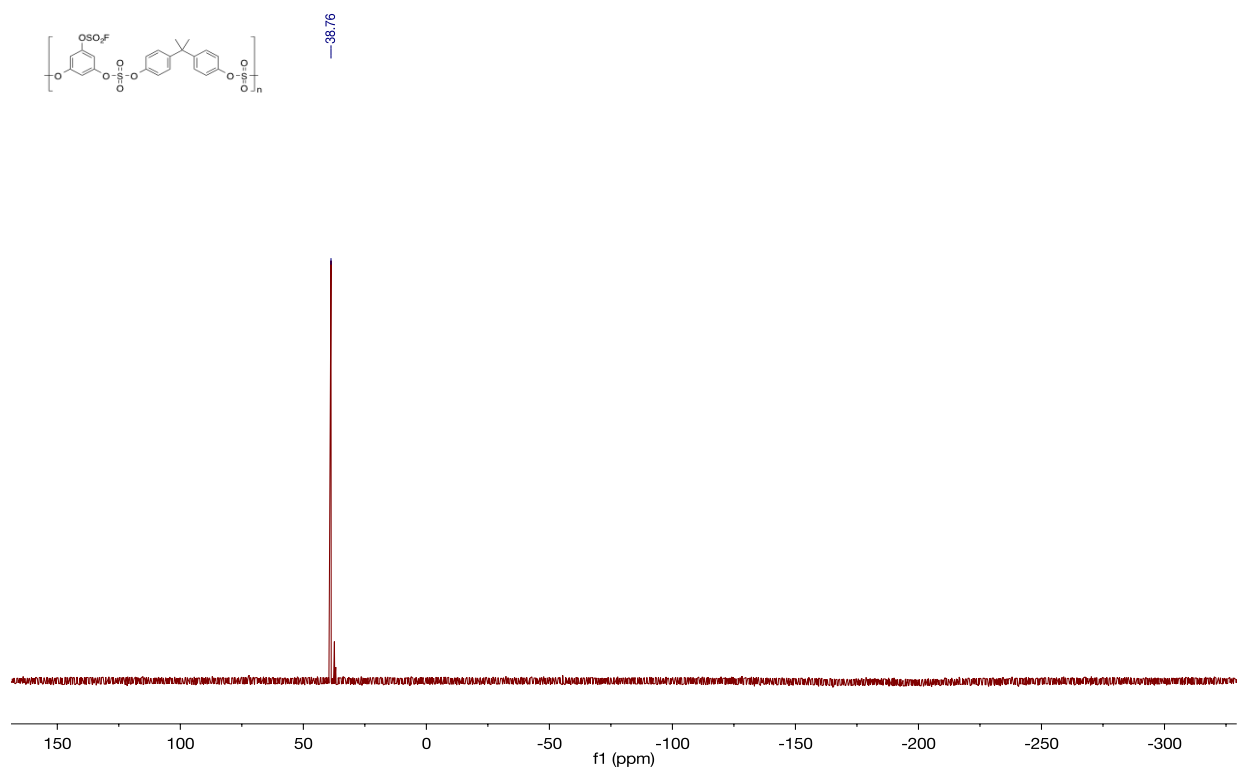



<sup>1</sup>H NMR (P-12)

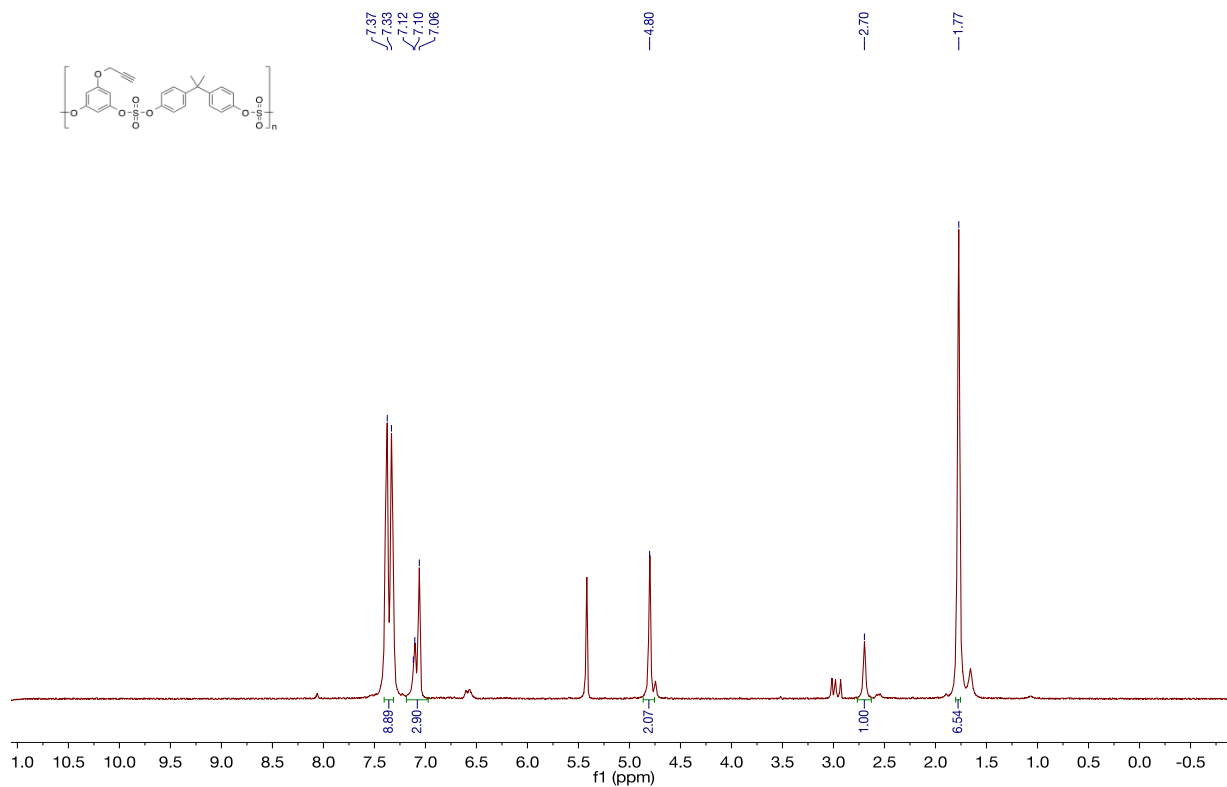

<sup>1</sup>H NMR (P-13)

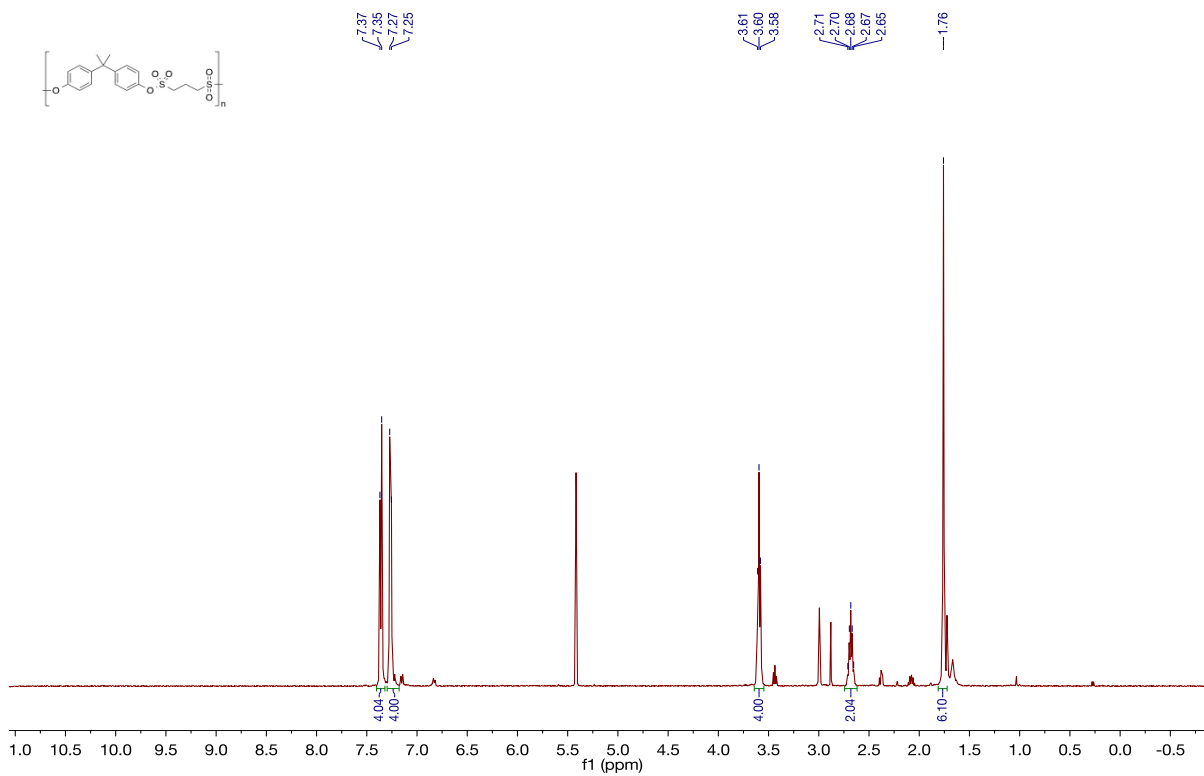

<sup>13</sup>C NMR (P-13)

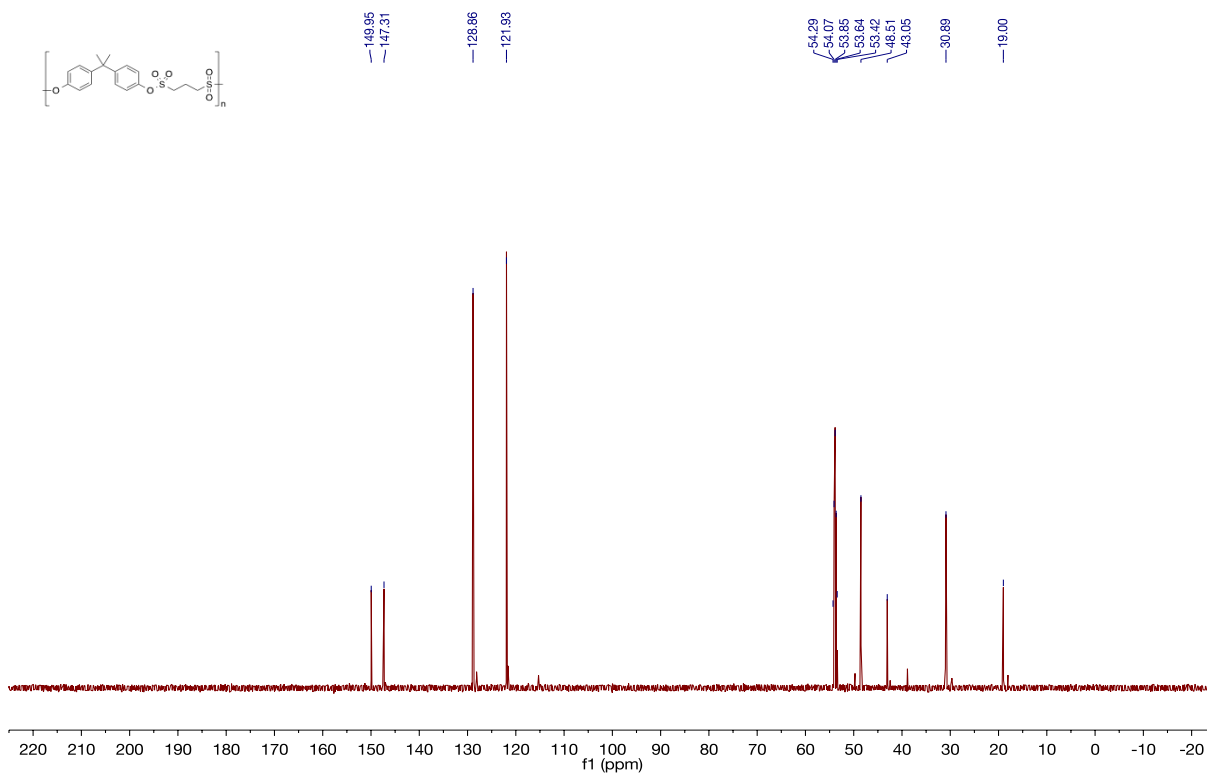

<sup>1</sup>H NMR (P-14)

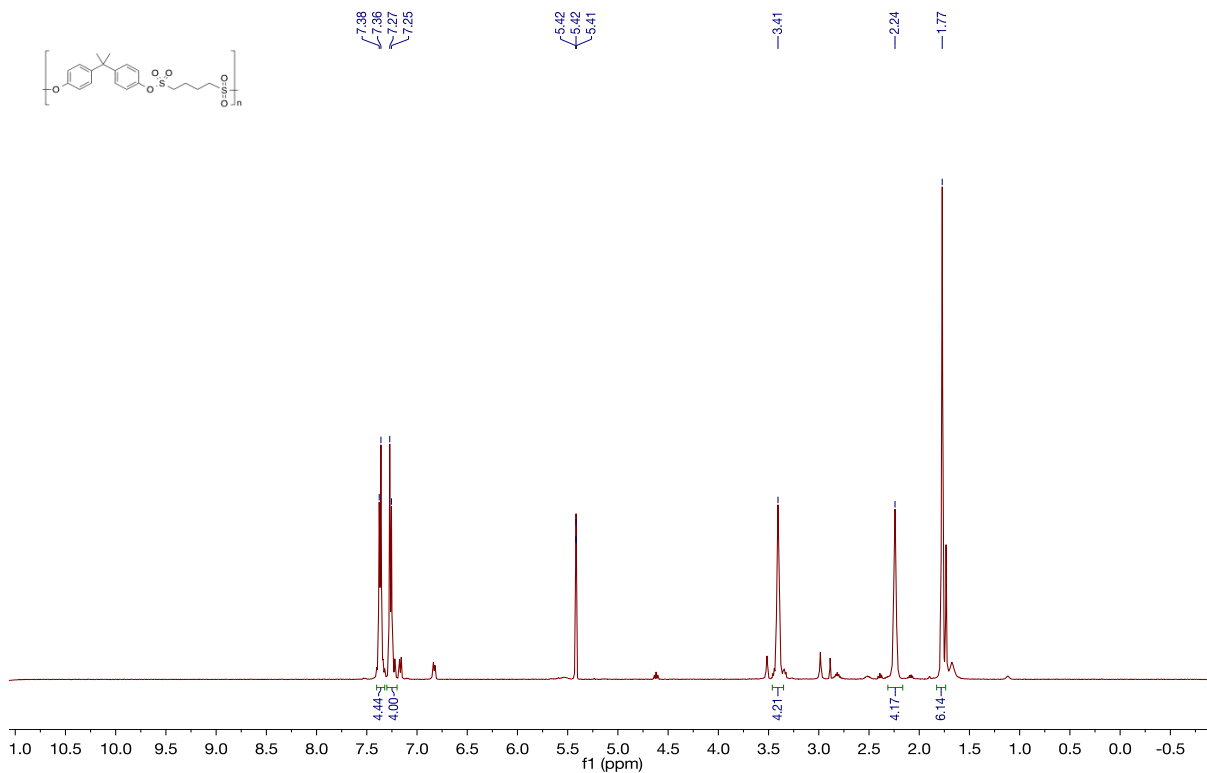

<sup>13</sup>C NMR (P-14)

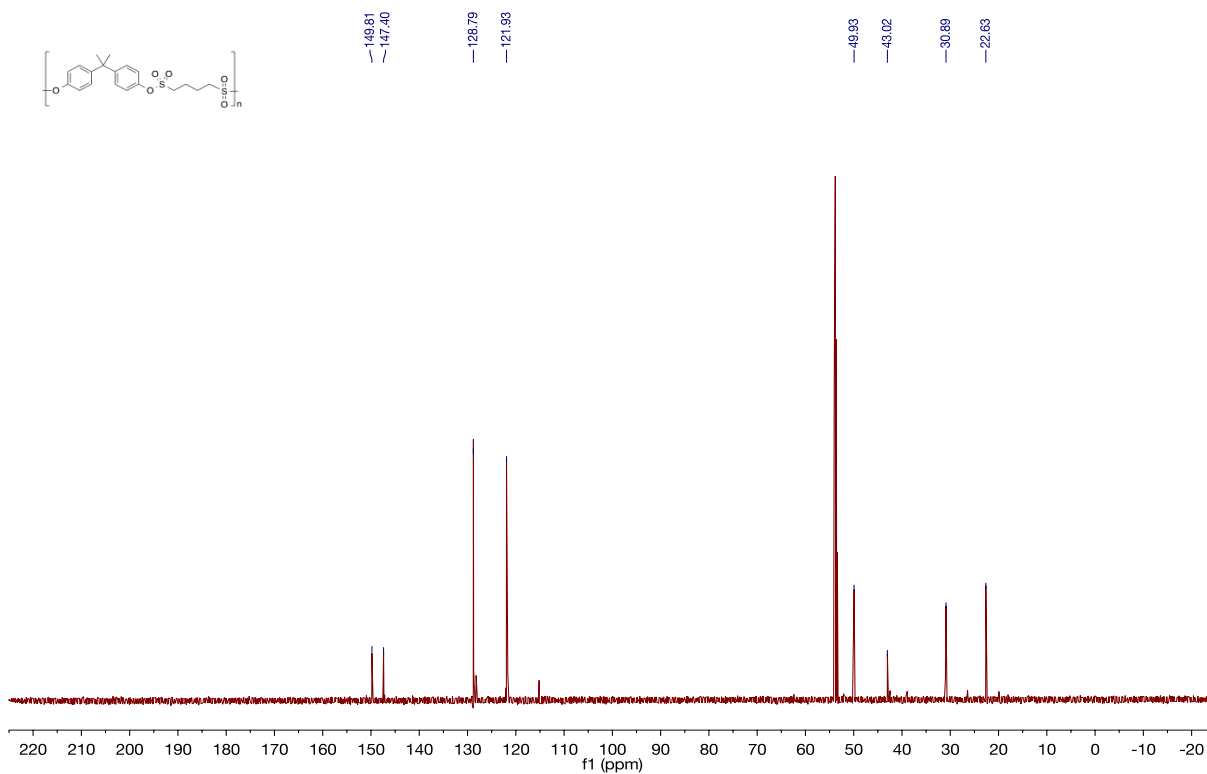

<sup>1</sup>H NMR (P-15)

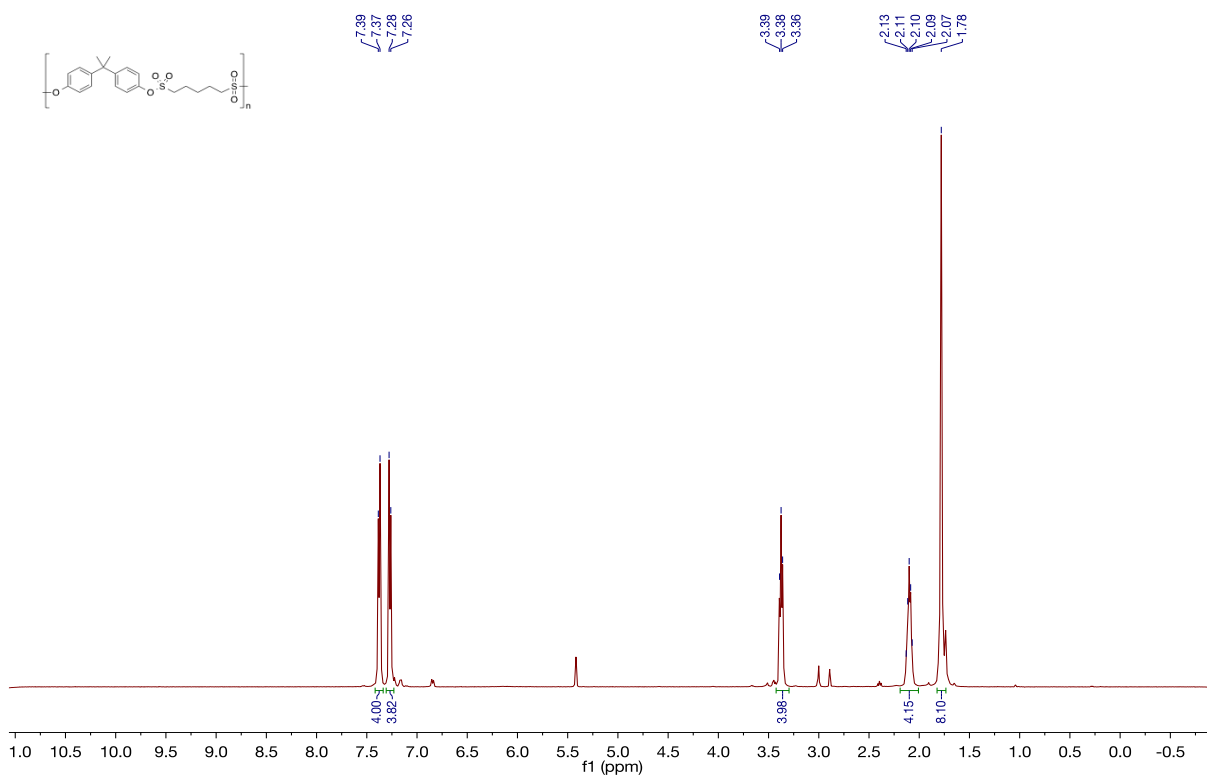

<sup>13</sup>C NMR (P-15)

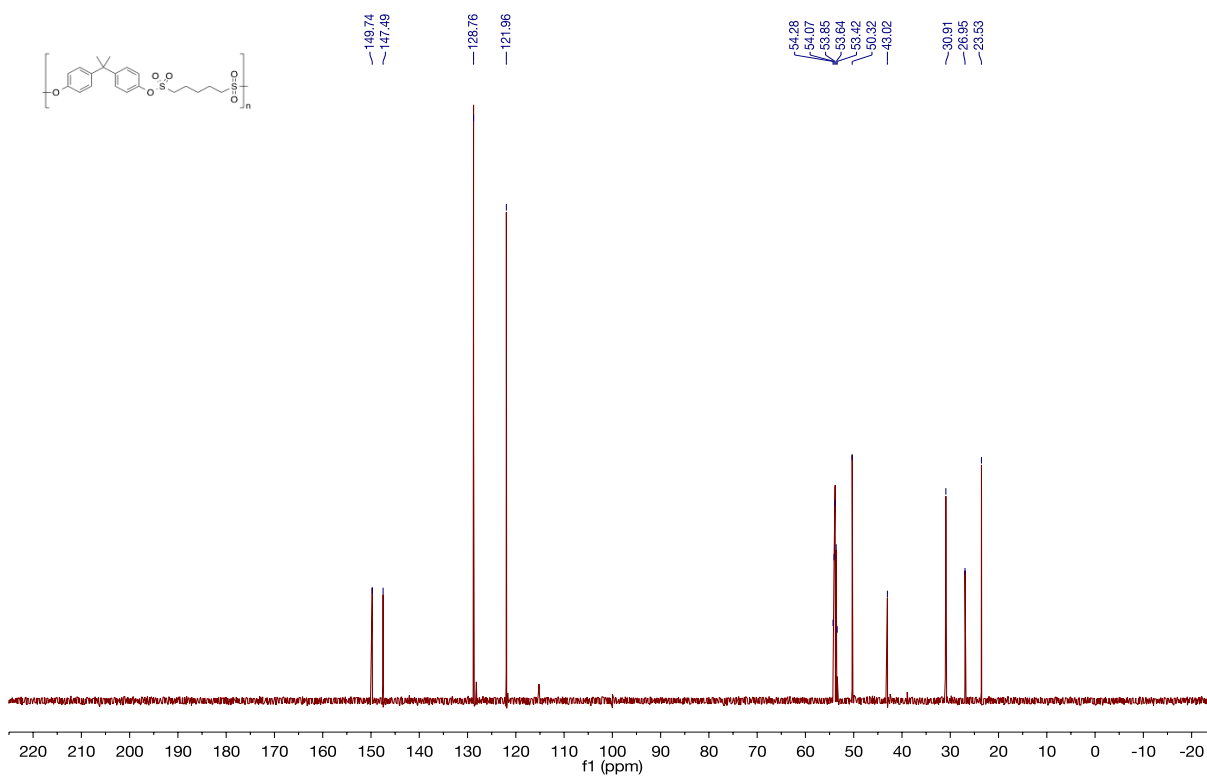

<sup>1</sup>H NMR (P-16)

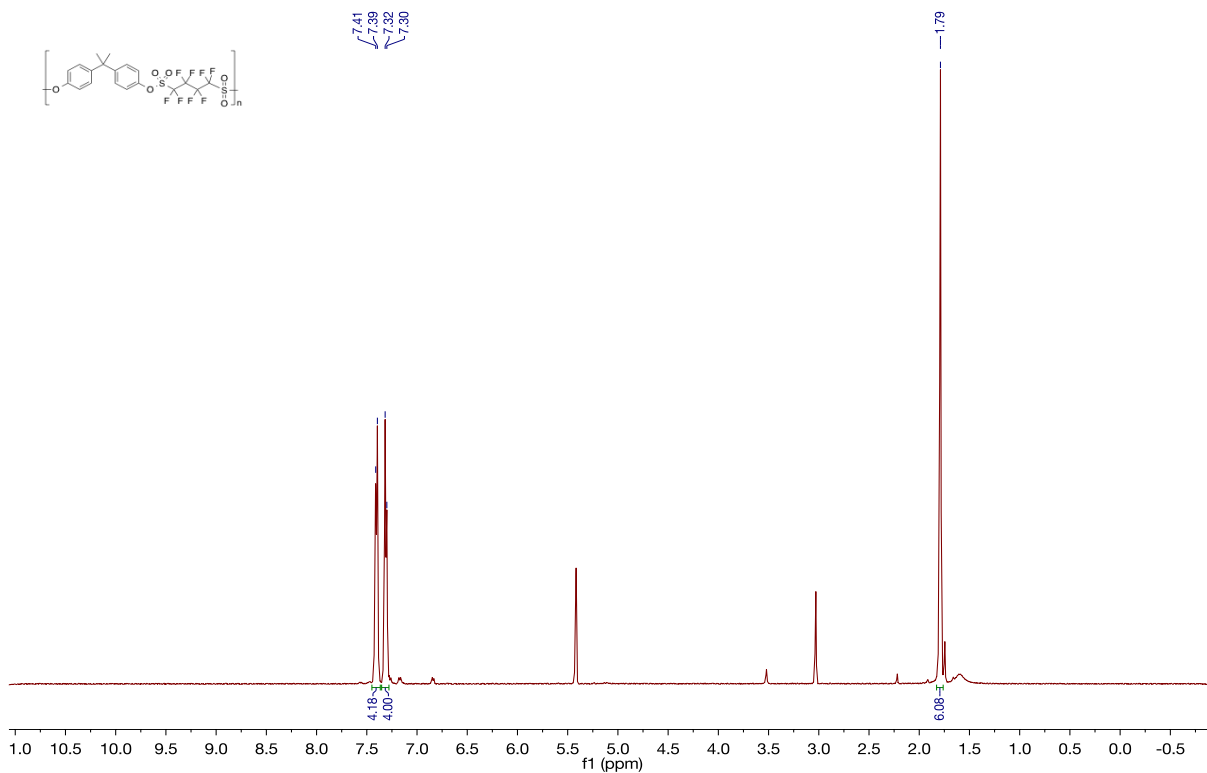

<sup>13</sup>C NMR (P-16)

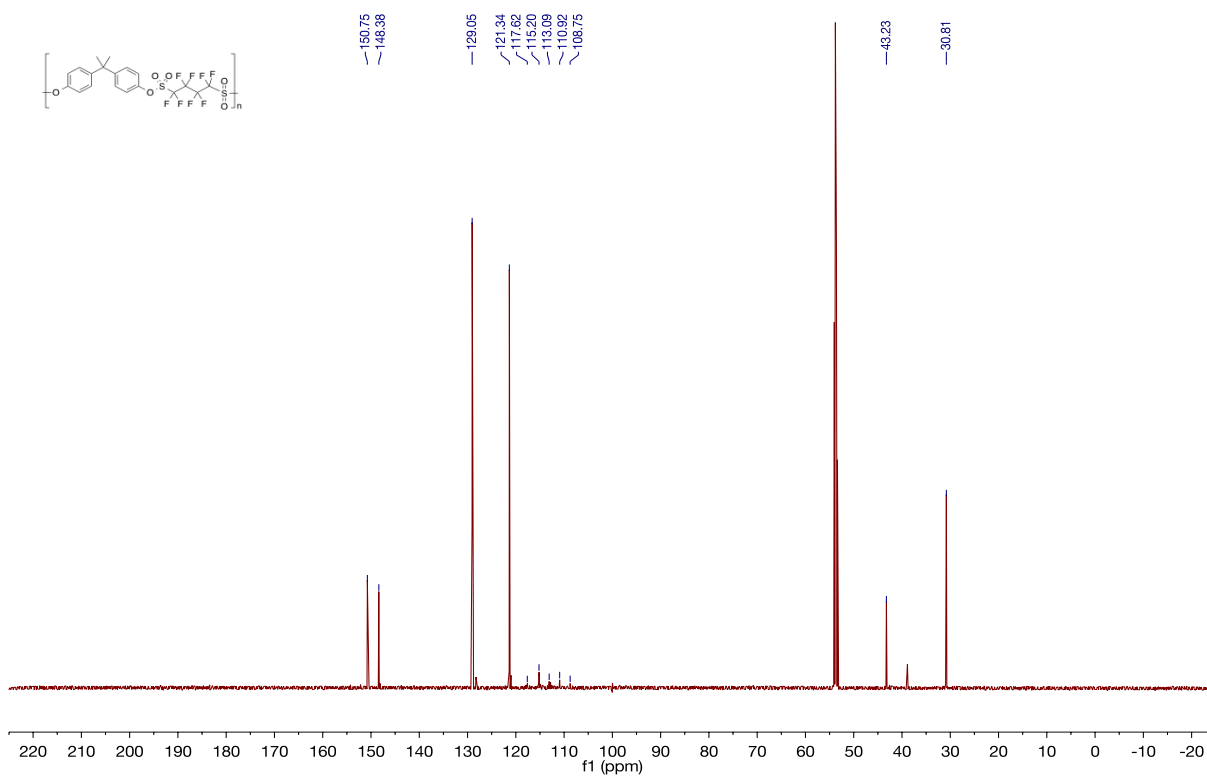

<sup>19</sup>F NMR (P-16)

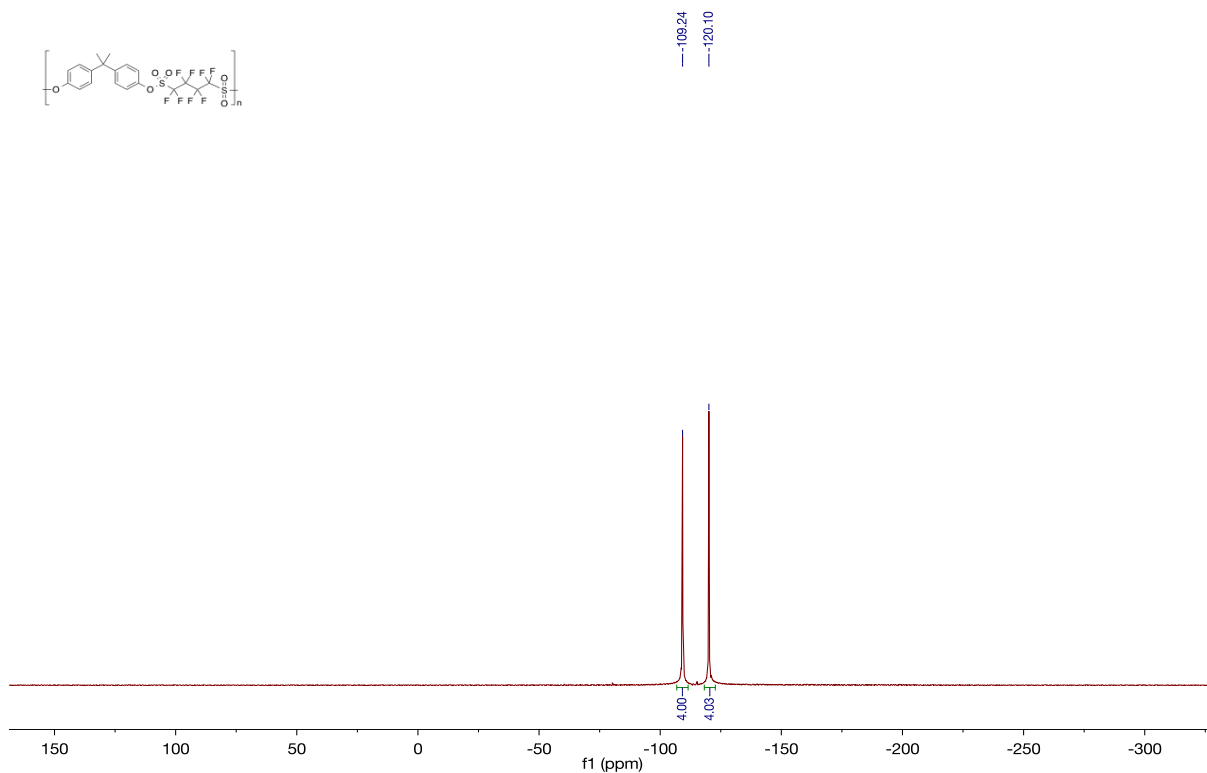

<sup>1</sup>H NMR (P-17)

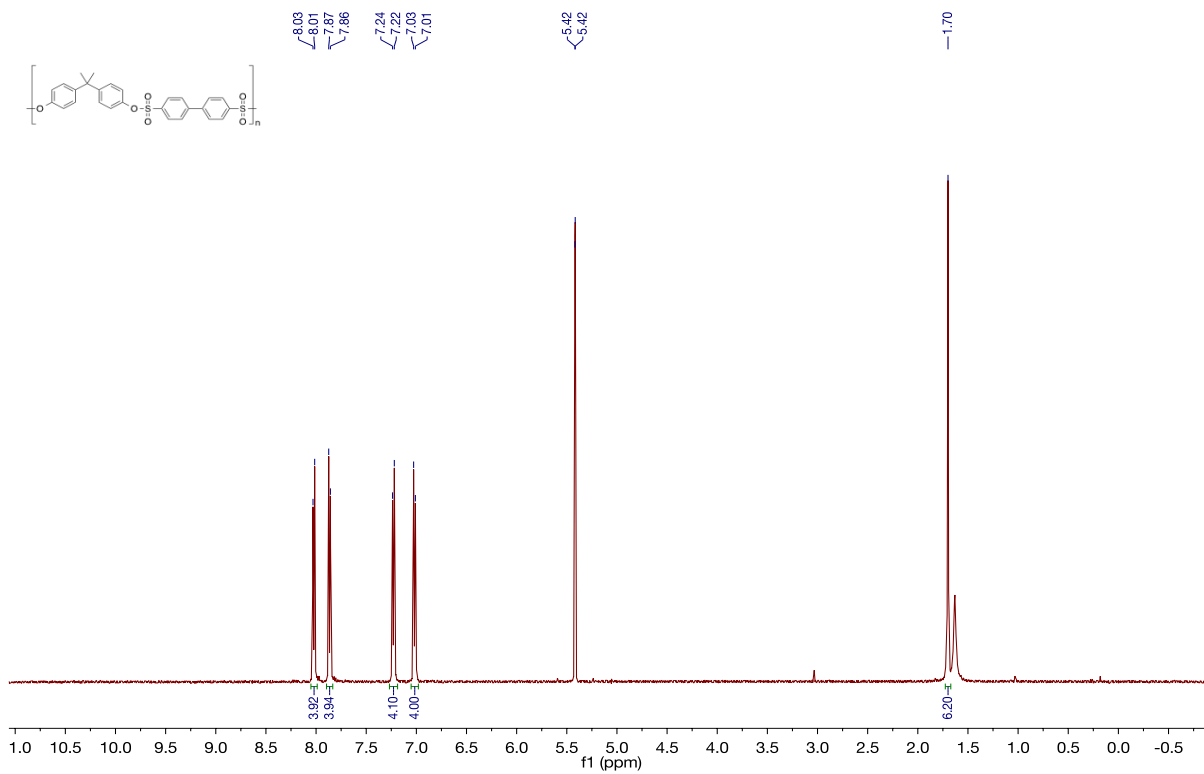

<sup>13</sup>C NMR (P-17)

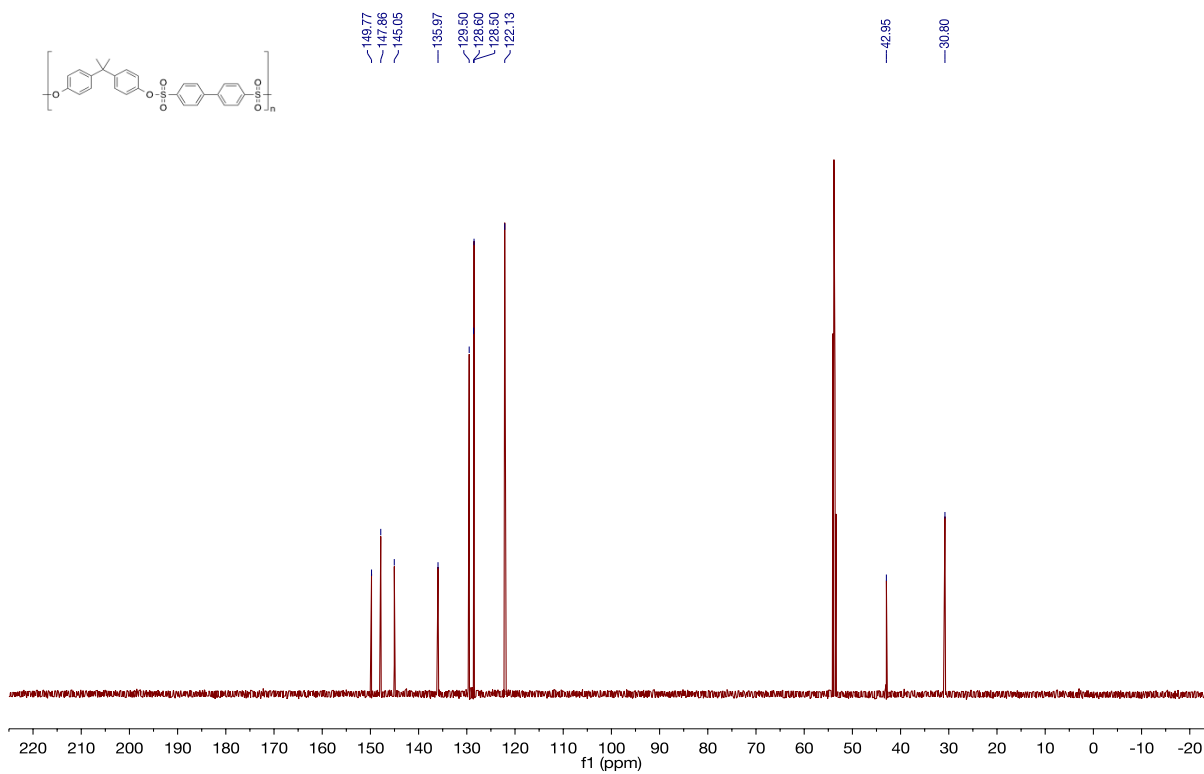

### 3-5, Copies of X-ray Crystallographic Analysis

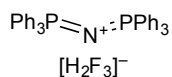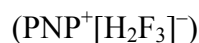

(CCDC number: 1522316)

#### *Experimental Summary*

The single crystal X-ray diffraction studies were carried out on a Bruker Kappa APEX-II Ultra CCD diffractometer equipped with Mo K<sub>α</sub> radiation (λ = 0.71073). Crystals of the subject compound were used as received (grown from DCM/Ether). A 0.14x 0.10 x 0.10 mm colorless block was mounted on a Cryoloop with Paratone oil.

Data were collected in a nitrogen gas stream at 100(2) K using φ and ω scans. Crystal-to-detector distance was 40 mm using exposure time 10s with a scan width of 0.5°. Data collection was 100.0% complete to 25.242° in θ. A total of 111676 reflections were collected covering the indices, -11 ≤ h ≤ 11, -21 ≤ k ≤ 21, -26 ≤ l ≤ 26. 4024 reflections were found to be symmetry independent, with a R<sub>int</sub> of 0.0520. Indexing and unit cell refinement indicated a primitive, **Triclinic** lattice. The space group was found to be **P-1**. The data were integrated using the Bruker SAINT software program and scaled using the SADABS software program. Solution by direct methods (SHELXT) produced a complete phasing model consistent with the proposed structure.

All non-hydrogen atoms were refined anisotropically by full-matrix least-squares (SHELXL-2014). All carbon bonded hydrogen atoms were placed using a riding model. Their positions were constrained relative to their parent atom using the appropriate HFIX command in SHELXL-2014.

Crystallographic data are summarized in Table 1.

Notes:

Two molecules in asymmetric unit. Position of hydrogen atoms in the H<sub>2</sub>F<sub>3</sub><sup>-</sup> was found a they isotropic thermal parameter freely refined, Hydrogen bonds summarized in Table 6. DCM solvate fully ordered

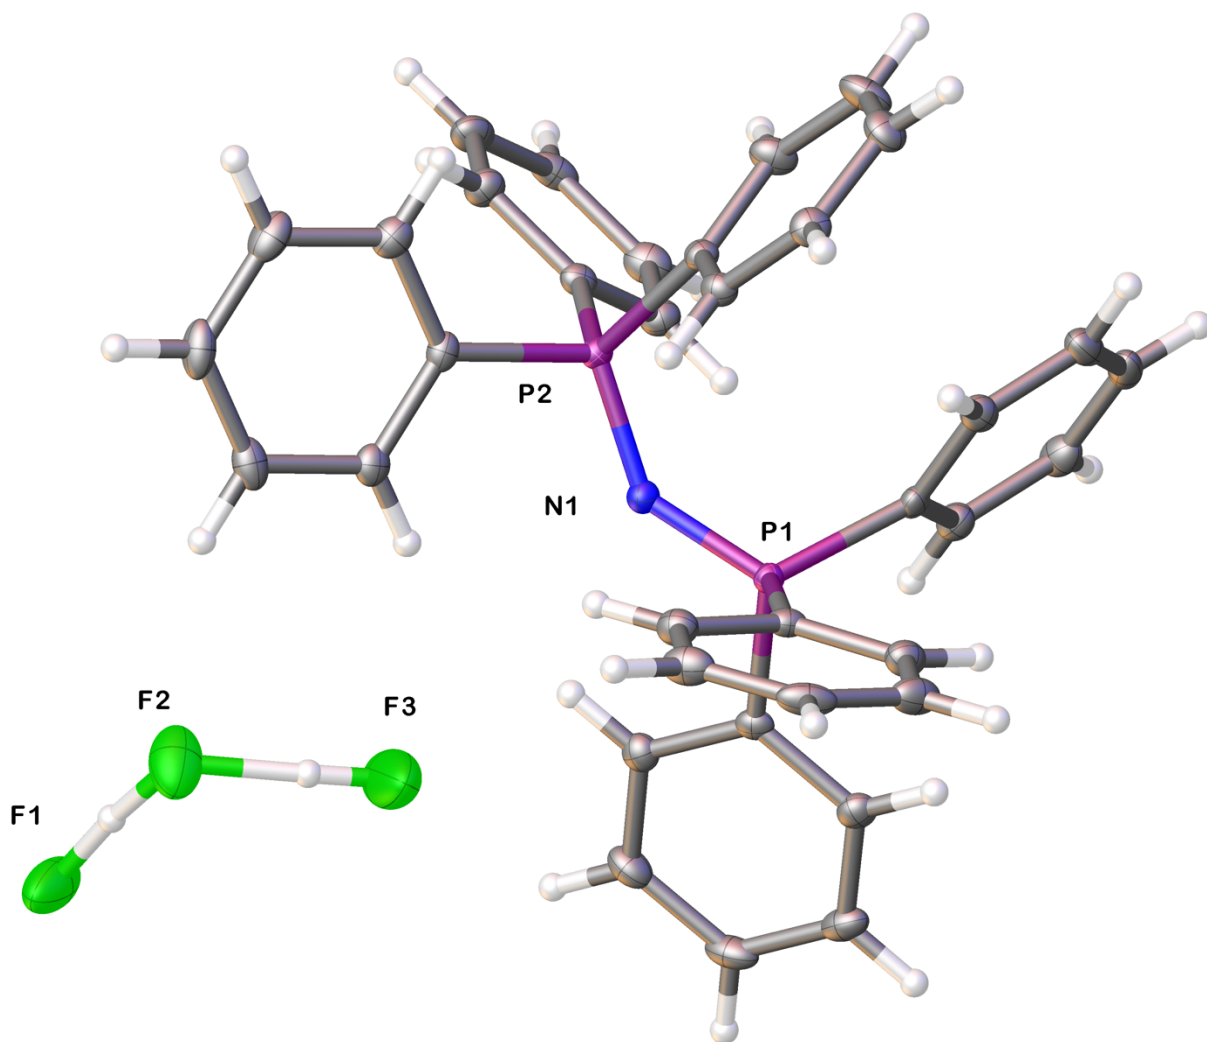



**Table 1. Crystal data and structure refinement.**

|                                   |                                                                                                                                                                       |
|-----------------------------------|-----------------------------------------------------------------------------------------------------------------------------------------------------------------------|
| Report date                       | 2016-07-03                                                                                                                                                            |
| Identification code               | GA28003                                                                                                                                                               |
| Empirical formula                 | C37 H34 Cl2 F3 N P2                                                                                                                                                   |
| Molecular formula                 | C36 H30 N P2, F3 H2, C H2 Cl2                                                                                                                                         |
| Formula weight                    | 682.49                                                                                                                                                                |
| Temperature                       | 100.0 K                                                                                                                                                               |
| Wavelength                        | 0.71073 Å                                                                                                                                                             |
| Crystal system                    | Triclinic                                                                                                                                                             |
| Space group                       | P-1                                                                                                                                                                   |
| Unit cell dimensions              | a = 9.4494(4) Å                      α = 89.671(2)°.<br>b = 16.8459(12) Å                     β = 83.274(2)°.<br>c = 20.9986(11) Å                    γ = 86.339(2)°. |
| Volume                            | 3312.8(3) Å <sup>3</sup>                                                                                                                                              |
| Z                                 | 4                                                                                                                                                                     |
| Density (calculated)              | 1.368 Mg/m <sup>3</sup>                                                                                                                                               |
| Absorption coefficient            | 0.338 mm <sup>-1</sup>                                                                                                                                                |
| F(000)                            | 1416                                                                                                                                                                  |
| Crystal size                      | 0.14 x 0.1 x 0.1 mm <sup>3</sup>                                                                                                                                      |
| Crystal color, habit              | colorless block                                                                                                                                                       |
| Theta range for data collection   | 1.555 to 26.395°.                                                                                                                                                     |
| Index ranges                      | -11 ≤ h ≤ 11, -21 ≤ k ≤ 21, -26 ≤ l ≤ 26                                                                                                                              |
| Reflections collected             | 111676                                                                                                                                                                |
| Independent reflections           | 13563 [R(int) = 0.0520]                                                                                                                                               |
| Completeness to theta = 25.242°   | 100.0 %                                                                                                                                                               |
| Absorption correction             | Semi-empirical from equivalents                                                                                                                                       |
| Max. and min. transmission        | 0.5595 and 0.5376                                                                                                                                                     |
| Refinement method                 | Full-matrix least-squares on F <sup>2</sup>                                                                                                                           |
| Data / restraints / parameters    | 13563 / 0 / 827                                                                                                                                                       |
| Goodness-of-fit on F <sup>2</sup> | 1.028                                                                                                                                                                 |
| Final R indices [I > 2σ(I)]       | R1 = 0.0347, wR2 = 0.0879                                                                                                                                             |
| R indices (all data)              | R1 = 0.0429, wR2 = 0.0943                                                                                                                                             |
| Extinction coefficient            | n/a                                                                                                                                                                   |
| Largest diff. peak and hole       | 0.770 and -0.751 e.Å <sup>-3</sup>                                                                                                                                    |

**Table 2. Atomic coordinates (  $\times 10^4$ ) and equivalent isotropic displacement parameters ( $\text{\AA}^2 \times 10^3$ )**U(eq) is defined as one third of the trace of the orthogonalized  $U^{ij}$  tensor.

|       | x        | y       | z       | U(eq) |
|-------|----------|---------|---------|-------|
| P(1)  | 8006(1)  | 2628(1) | 8274(1) | 11(1) |
| P(2)  | 10277(1) | 2761(1) | 7190(1) | 11(1) |
| N(1)  | 8781(1)  | 2575(1) | 7563(1) | 14(1) |
| C(1)  | 6516(2)  | 2010(1) | 8321(1) | 14(1) |
| C(2)  | 5696(2)  | 1904(1) | 8911(1) | 17(1) |
| C(3)  | 4538(2)  | 1434(1) | 8943(1) | 21(1) |
| C(4)  | 4186(2)  | 1079(1) | 8394(1) | 23(1) |
| C(5)  | 4989(2)  | 1190(1) | 7808(1) | 22(1) |
| C(6)  | 6161(2)  | 1656(1) | 7767(1) | 17(1) |
| C(7)  | 9101(2)  | 2268(1) | 8875(1) | 14(1) |
| C(8)  | 10039(2) | 2753(1) | 9130(1) | 17(1) |
| C(9)  | 10967(2) | 2439(1) | 9549(1) | 21(1) |
| C(10) | 10953(2) | 1641(1) | 9717(1) | 22(1) |
| C(11) | 10042(2) | 1152(1) | 9461(1) | 22(1) |
| C(12) | 9118(2)  | 1458(1) | 9040(1) | 18(1) |
| C(13) | 7297(2)  | 3624(1) | 8483(1) | 14(1) |
| C(14) | 6974(2)  | 3862(1) | 9122(1) | 18(1) |
| C(15) | 6388(2)  | 4626(1) | 9266(1) | 23(1) |
| C(16) | 6105(2)  | 5150(1) | 8778(1) | 24(1) |
| C(17) | 6402(2)  | 4911(1) | 8142(1) | 23(1) |
| C(18) | 6997(2)  | 4151(1) | 7991(1) | 18(1) |
| C(19) | 9992(2)  | 3305(1) | 6473(1) | 14(1) |
| C(20) | 8654(2)  | 3323(1) | 6253(1) | 17(1) |
| C(21) | 8442(2)  | 3712(1) | 5682(1) | 21(1) |
| C(22) | 9567(2)  | 4071(1) | 5330(1) | 24(1) |
| C(23) | 10895(2) | 4059(1) | 5552(1) | 23(1) |
| C(24) | 11115(2) | 3684(1) | 6126(1) | 18(1) |
| C(25) | 11342(2) | 3349(1) | 7637(1) | 13(1) |
| C(26) | 12596(2) | 3038(1) | 7858(1) | 20(1) |
| C(27) | 13274(2) | 3485(1) | 8272(1) | 24(1) |
| C(28) | 12713(2) | 4236(1) | 8464(1) | 21(1) |
| C(29) | 11486(2) | 4558(1) | 8229(1) | 17(1) |

---

|        |          |         |         |       |
|--------|----------|---------|---------|-------|
| C(30)  | 10800(2) | 4117(1) | 7818(1) | 15(1) |
| C(31)  | 11289(2) | 1846(1) | 6952(1) | 14(1) |
| C(32)  | 11118(2) | 1178(1) | 7344(1) | 17(1) |
| C(33)  | 11878(2) | 464(1)  | 7171(1) | 21(1) |
| C(34)  | 12802(2) | 413(1)  | 6606(1) | 20(1) |
| C(35)  | 12969(2) | 1073(1) | 6213(1) | 21(1) |
| C(36)  | 12219(2) | 1790(1) | 6385(1) | 18(1) |
| F(1)   | 3854(2)  | 2413(1) | 5080(1) | 57(1) |
| F(2)   | 5156(2)  | 3244(1) | 5614(1) | 50(1) |
| F(3)   | 5292(2)  | 2894(2) | 6667(1) | 98(1) |
| Cl(1)  | 6557(1)  | 545(1)  | 5272(1) | 30(1) |
| Cl(2)  | 8370(1)  | 1106(1) | 6192(1) | 37(1) |
| C(37)  | 7163(2)  | 1384(1) | 5637(1) | 34(1) |
| P(1')  | 7897(1)  | 2451(1) | 3264(1) | 11(1) |
| P(2')  | 10188(1) | 2664(1) | 2196(1) | 11(1) |
| N(1')  | 8710(1)  | 2436(1) | 2562(1) | 14(1) |
| C(1')  | 6417(2)  | 1832(1) | 3258(1) | 14(1) |
| C(2')  | 5528(2)  | 1710(1) | 3824(1) | 19(1) |
| C(3')  | 4360(2)  | 1252(1) | 3816(1) | 23(1) |
| C(4')  | 4076(2)  | 920(1)  | 3246(1) | 25(1) |
| C(5')  | 4947(2)  | 1047(1) | 2682(1) | 24(1) |
| C(6')  | 6118(2)  | 1507(1) | 2683(1) | 18(1) |
| C(7')  | 8969(2)  | 2066(1) | 3865(1) | 14(1) |
| C(8')  | 9822(2)  | 2555(1) | 4172(1) | 18(1) |
| C(9')  | 10741(2) | 2228(1) | 4587(1) | 22(1) |
| C(10') | 10820(2) | 1414(1) | 4698(1) | 21(1) |
| C(11') | 9997(2)  | 922(1)  | 4388(1) | 21(1) |
| C(12') | 9070(2)  | 1244(1) | 3974(1) | 17(1) |
| C(13') | 7155(2)  | 3430(1) | 3514(1) | 14(1) |
| C(14') | 6732(2)  | 3602(1) | 4159(1) | 18(1) |
| C(15') | 6111(2)  | 4348(1) | 4338(1) | 22(1) |
| C(16') | 5917(2)  | 4927(1) | 3877(1) | 21(1) |
| C(17') | 6312(2)  | 4754(1) | 3232(1) | 20(1) |
| C(18') | 6924(2)  | 4005(1) | 3048(1) | 17(1) |
| C(19') | 9827(2)  | 3237(1) | 1503(1) | 14(1) |

---

---

|        |          |         |         |       |
|--------|----------|---------|---------|-------|
| C(20') | 8470(2)  | 3242(1) | 1299(1) | 15(1) |
| C(21') | 8188(2)  | 3667(1) | 753(1)  | 19(1) |
| C(22') | 9262(2)  | 4073(1) | 407(1)  | 21(1) |
| C(23') | 10612(2) | 4067(1) | 607(1)  | 21(1) |
| C(24') | 10896(2) | 3656(1) | 1157(1) | 17(1) |
| C(25') | 11214(2) | 3248(1) | 2667(1) | 14(1) |
| C(26') | 12457(2) | 2939(1) | 2897(1) | 23(1) |
| C(27') | 13096(2) | 3380(1) | 3331(1) | 28(1) |
| C(28') | 12505(2) | 4120(1) | 3533(1) | 23(1) |
| C(29') | 11284(2) | 4440(1) | 3294(1) | 18(1) |
| C(30') | 10638(2) | 4007(1) | 2862(1) | 15(1) |
| C(31') | 11244(2) | 1772(1) | 1925(1) | 13(1) |
| C(32') | 10987(2) | 1059(1) | 2246(1) | 18(1) |
| C(33') | 11742(2) | 358(1)  | 2030(1) | 22(1) |
| C(34') | 12745(2) | 366(1)  | 1492(1) | 21(1) |
| C(35') | 13012(2) | 1072(1) | 1175(1) | 21(1) |
| C(36') | 12271(2) | 1779(1) | 1389(1) | 18(1) |
| Cl(1') | 6634(1)  | 449(1)  | 250(1)  | 27(1) |
| Cl(2') | 8550(1)  | 916(1)  | 1159(1) | 30(1) |
| C(37') | 7186(2)  | 1242(1) | 691(1)  | 26(1) |
| F(1')  | 3699(1)  | 3609(1) | -83(1)  | 45(1) |
| F(2')  | 5159(2)  | 2658(1) | 376(1)  | 71(1) |
| F(3')  | 5138(1)  | 2795(1) | 1467(1) | 49(1) |

---

**Table 3. Bond lengths [Å] and angles [°] for GA28003 (PNP<sup>+</sup>H<sub>2</sub>F<sub>3</sub>).**

|             |            |               |            |
|-------------|------------|---------------|------------|
| P(1)-N(1)   | 1.5842(13) | P(1')-N(1')   | 1.5796(13) |
| P(1)-C(1)   | 1.7967(15) | P(1')-C(1')   | 1.7975(15) |
| P(1)-C(7)   | 1.8032(15) | P(1')-C(7')   | 1.8026(15) |
| P(1)-C(13)  | 1.8043(15) | P(1')-C(13')  | 1.8063(15) |
| P(2)-N(1)   | 1.5826(13) | P(2')-N(1')   | 1.5824(13) |
| P(2)-C(19)  | 1.7969(15) | P(2')-C(19')  | 1.7955(15) |
| P(2)-C(25)  | 1.7987(15) | P(2')-C(25')  | 1.8009(15) |
| P(2)-C(31)  | 1.8035(15) | P(2')-C(31')  | 1.8072(15) |
| C(1)-C(2)   | 1.399(2)   | C(1')-C(2')   | 1.396(2)   |
| C(1)-C(6)   | 1.394(2)   | C(1')-C(6')   | 1.394(2)   |
| C(2)-H(2)   | 0.9500     | C(2')-H(2')   | 0.9500     |
| C(2)-C(3)   | 1.386(2)   | C(2')-C(3')   | 1.388(2)   |
| C(3)-H(3)   | 0.9500     | C(3')-H(3')   | 0.9500     |
| C(3)-C(4)   | 1.386(2)   | C(3')-C(4')   | 1.386(3)   |
| C(4)-H(4)   | 0.9500     | C(4')-H(4')   | 0.9500     |
| C(4)-C(5)   | 1.385(2)   | C(4')-C(5')   | 1.385(3)   |
| C(5)-H(5)   | 0.9500     | C(5')-H(5')   | 0.9500     |
| C(5)-C(6)   | 1.393(2)   | C(5')-C(6')   | 1.392(2)   |
| C(6)-H(6)   | 0.9500     | C(6')-H(6')   | 0.9500     |
| C(7)-C(8)   | 1.396(2)   | C(7')-C(8')   | 1.398(2)   |
| C(7)-C(12)  | 1.405(2)   | C(7')-C(12')  | 1.401(2)   |
| C(8)-H(8)   | 0.9500     | C(8')-H(8')   | 0.9500     |
| C(8)-C(9)   | 1.393(2)   | C(8')-C(9')   | 1.389(2)   |
| C(9)-H(9)   | 0.9500     | C(9')-H(9')   | 0.9500     |
| C(9)-C(10)  | 1.388(2)   | C(9')-C(10')  | 1.389(2)   |
| C(10)-H(10) | 0.9500     | C(10')-H(10') | 0.9500     |
| C(10)-C(11) | 1.383(2)   | C(10')-C(11') | 1.386(2)   |
| C(11)-H(11) | 0.9500     | C(11')-H(11') | 0.9500     |
| C(11)-C(12) | 1.388(2)   | C(11')-C(12') | 1.389(2)   |
| C(12)-H(12) | 0.9500     | C(12')-H(12') | 0.9500     |
| C(13)-C(14) | 1.394(2)   | C(13')-C(14') | 1.394(2)   |
| C(13)-C(18) | 1.401(2)   | C(13')-C(18') | 1.399(2)   |
| C(14)-H(14) | 0.9500     | C(14')-H(14') | 0.9500     |
| C(14)-C(15) | 1.388(2)   | C(14')-C(15') | 1.388(2)   |

---

|             |          |               |          |
|-------------|----------|---------------|----------|
| C(15)-H(15) | 0.9500   | C(15')-H(15') | 0.9500   |
| C(15)-C(16) | 1.388(3) | C(15')-C(16') | 1.390(2) |
| C(16)-H(16) | 0.9500   | C(16')-H(16') | 0.9500   |
| C(16)-C(17) | 1.386(3) | C(16')-C(17') | 1.388(2) |
| C(17)-H(17) | 0.9500   | C(17')-H(17') | 0.9500   |
| C(17)-C(18) | 1.389(2) | C(17')-C(18') | 1.391(2) |
| C(18)-H(18) | 0.9500   | C(18')-H(18') | 0.9500   |
| C(19)-C(20) | 1.394(2) | C(19')-C(20') | 1.398(2) |
| C(19)-C(24) | 1.401(2) | C(19')-C(24') | 1.400(2) |
| C(20)-H(20) | 0.9500   | C(20')-H(20') | 0.9500   |
| C(20)-C(21) | 1.394(2) | C(20')-C(21') | 1.391(2) |
| C(21)-H(21) | 0.9500   | C(21')-H(21') | 0.9500   |
| C(21)-C(22) | 1.390(3) | C(21')-C(22') | 1.392(2) |
| C(22)-H(22) | 0.9500   | C(22')-H(22') | 0.9500   |
| C(22)-C(23) | 1.388(3) | C(22')-C(23') | 1.389(2) |
| C(23)-H(23) | 0.9500   | C(23')-H(23') | 0.9500   |
| C(23)-C(24) | 1.389(2) | C(23')-C(24') | 1.387(2) |
| C(24)-H(24) | 0.9500   | C(24')-H(24') | 0.9500   |
| C(25)-C(26) | 1.392(2) | C(25')-C(26') | 1.391(2) |
| C(25)-C(30) | 1.398(2) | C(25')-C(30') | 1.401(2) |
| C(26)-H(26) | 0.9500   | C(26')-H(26') | 0.9500   |
| C(26)-C(27) | 1.391(2) | C(26')-C(27') | 1.393(2) |
| C(27)-H(27) | 0.9500   | C(27')-H(27') | 0.9500   |
| C(27)-C(28) | 1.384(2) | C(27')-C(28') | 1.382(2) |
| C(28)-H(28) | 0.9500   | C(28')-H(28') | 0.9500   |
| C(28)-C(29) | 1.390(2) | C(28')-C(29') | 1.386(2) |
| C(29)-H(29) | 0.9500   | C(29')-H(29') | 0.9500   |
| C(29)-C(30) | 1.384(2) | C(29')-C(30') | 1.387(2) |
| C(30)-H(30) | 0.9500   | C(30')-H(30') | 0.9500   |
| C(31)-C(32) | 1.398(2) | C(31')-C(32') | 1.396(2) |
| C(31)-C(36) | 1.395(2) | C(31')-C(36') | 1.398(2) |
| C(32)-H(32) | 0.9500   | C(32')-H(32') | 0.9500   |
| C(32)-C(33) | 1.387(2) | C(32')-C(33') | 1.390(2) |
| C(33)-H(33) | 0.9500   | C(33')-H(33') | 0.9500   |
| C(33)-C(34) | 1.387(2) | C(33')-C(34') | 1.387(2) |

---

|                  |            |                     |            |
|------------------|------------|---------------------|------------|
| C(34)-H(34)      | 0.9500     | C(34')-H(34')       | 0.9500     |
| C(34)-C(35)      | 1.387(2)   | C(34')-C(35')       | 1.384(2)   |
| C(35)-H(35)      | 0.9500     | C(35')-H(35')       | 0.9500     |
| C(35)-C(36)      | 1.388(2)   | C(35')-C(36')       | 1.391(2)   |
| C(36)-H(36)      | 0.9500     | C(36')-H(36')       | 0.9500     |
| F(1)-H(1)        | 1.15(4)    | Cl(1')-C(37')       | 1.7702(18) |
| F(2)-H(1)        | 1.15(4)    | Cl(2')-C(37')       | 1.7691(18) |
| F(2)-H(2A)       | 1.40(4)    | C(37')-H(37C)       | 0.9900     |
| F(3)-H(2A)       | 0.90(4)    | C(37')-H(37D)       | 0.9900     |
| Cl(1)-C(37)      | 1.769(2)   | F(1')-H(1')         | 1.08(5)    |
| Cl(2)-C(37)      | 1.765(2)   | F(2')-H(1')         | 1.26(5)    |
| C(37)-H(37A)     | 0.9900     | F(2')-H(2'A)        | 1.28(4)    |
| C(37)-H(37B)     | 0.9900     | F(3')-H(2'A)        | 1.02(4)    |
| <hr/>            |            |                     |            |
| N(1)-P(1)-C(1)   | 107.64(7)  | N(1')-P(1')-C(1')   | 106.96(7)  |
| N(1)-P(1)-C(7)   | 114.30(7)  | N(1')-P(1')-C(7')   | 113.92(7)  |
| N(1)-P(1)-C(13)  | 112.13(7)  | N(1')-P(1')-C(13')  | 113.06(7)  |
| C(1)-P(1)-C(7)   | 106.49(7)  | C(1')-P(1')-C(7')   | 107.68(7)  |
| C(1)-P(1)-C(13)  | 107.00(7)  | C(1')-P(1')-C(13')  | 106.70(7)  |
| C(7)-P(1)-C(13)  | 108.87(7)  | C(7')-P(1')-C(13')  | 108.15(7)  |
| N(1)-P(2)-C(19)  | 109.14(7)  | N(1')-P(2')-C(19')  | 108.02(7)  |
| N(1)-P(2)-C(25)  | 114.27(7)  | N(1')-P(2')-C(25')  | 113.90(7)  |
| N(1)-P(2)-C(31)  | 109.93(7)  | N(1')-P(2')-C(31')  | 109.72(7)  |
| C(19)-P(2)-C(25) | 107.05(7)  | C(19')-P(2')-C(25') | 107.89(7)  |
| C(19)-P(2)-C(31) | 107.51(7)  | C(19')-P(2')-C(31') | 108.09(7)  |
| C(25)-P(2)-C(31) | 108.70(7)  | C(25')-P(2')-C(31') | 109.06(7)  |
| P(2)-N(1)-P(1)   | 138.07(9)  | P(1')-N(1')-P(2')   | 139.51(9)  |
| C(2)-C(1)-P(1)   | 119.76(12) | C(2')-C(1')-P(1')   | 119.82(12) |
| C(6)-C(1)-P(1)   | 119.88(12) | C(6')-C(1')-P(1')   | 120.05(12) |
| C(6)-C(1)-C(2)   | 120.35(14) | C(6')-C(1')-C(2')   | 120.06(14) |
| C(1)-C(2)-H(2)   | 120.3      | C(1')-C(2')-H(2')   | 120.1      |
| C(3)-C(2)-C(1)   | 119.50(15) | C(3')-C(2')-C(1')   | 119.88(16) |
| C(3)-C(2)-H(2)   | 120.3      | C(3')-C(2')-H(2')   | 120.1      |
| C(2)-C(3)-H(3)   | 119.9      | C(2')-C(3')-H(3')   | 120.0      |

---

|                   |            |                      |            |
|-------------------|------------|----------------------|------------|
| C(4)-C(3)-C(2)    | 120.28(15) | C(4')-C(3')-C(2')    | 119.99(16) |
| C(4)-C(3)-H(3)    | 119.9      | C(4')-C(3')-H(3')    | 120.0      |
| C(3)-C(4)-H(4)    | 119.9      | C(3')-C(4')-H(4')    | 119.9      |
| C(5)-C(4)-C(3)    | 120.30(15) | C(5')-C(4')-C(3')    | 120.30(15) |
| C(5)-C(4)-H(4)    | 119.9      | C(5')-C(4')-H(4')    | 119.9      |
| C(4)-C(5)-H(5)    | 119.9      | C(4')-C(5')-H(5')    | 119.9      |
| C(4)-C(5)-C(6)    | 120.26(16) | C(4')-C(5')-C(6')    | 120.28(16) |
| C(6)-C(5)-H(5)    | 119.9      | C(6')-C(5')-H(5')    | 119.9      |
| C(1)-C(6)-H(6)    | 120.3      | C(1')-C(6')-H(6')    | 120.3      |
| C(5)-C(6)-C(1)    | 119.31(15) | C(5')-C(6')-C(1')    | 119.47(15) |
| C(5)-C(6)-H(6)    | 120.3      | C(5')-C(6')-H(6')    | 120.3      |
| C(8)-C(7)-P(1)    | 121.56(12) | C(8')-C(7')-P(1')    | 121.39(12) |
| C(8)-C(7)-C(12)   | 119.22(14) | C(8')-C(7')-C(12')   | 119.34(14) |
| C(12)-C(7)-P(1)   | 118.88(12) | C(12')-C(7')-P(1')   | 118.87(12) |
| C(7)-C(8)-H(8)    | 119.9      | C(7')-C(8')-H(8')    | 119.9      |
| C(9)-C(8)-C(7)    | 120.23(15) | C(9')-C(8')-C(7')    | 120.10(15) |
| C(9)-C(8)-H(8)    | 119.9      | C(9')-C(8')-H(8')    | 119.9      |
| C(8)-C(9)-H(9)    | 120.1      | C(8')-C(9')-H(9')    | 119.9      |
| C(10)-C(9)-C(8)   | 119.89(16) | C(10')-C(9')-C(8')   | 120.11(15) |
| C(10)-C(9)-H(9)   | 120.1      | C(10')-C(9')-H(9')   | 119.9      |
| C(9)-C(10)-H(10)  | 119.8      | C(9')-C(10')-H(10')  | 119.9      |
| C(11)-C(10)-C(9)  | 120.38(15) | C(11')-C(10')-C(9')  | 120.24(15) |
| C(11)-C(10)-H(10) | 119.8      | C(11')-C(10')-H(10') | 119.9      |
| C(10)-C(11)-H(11) | 119.9      | C(10')-C(11')-H(11') | 120.0      |
| C(10)-C(11)-C(12) | 120.20(16) | C(10')-C(11')-C(12') | 120.07(15) |
| C(12)-C(11)-H(11) | 119.9      | C(12')-C(11')-H(11') | 120.0      |
| C(7)-C(12)-H(12)  | 120.0      | C(7')-C(12')-H(12')  | 119.9      |
| C(11)-C(12)-C(7)  | 120.06(15) | C(11')-C(12')-C(7')  | 120.12(15) |
| C(11)-C(12)-H(12) | 120.0      | C(11')-C(12')-H(12') | 119.9      |
| C(14)-C(13)-P(1)  | 121.42(12) | C(14')-C(13')-P(1')  | 120.86(12) |
| C(14)-C(13)-C(18) | 119.77(14) | C(14')-C(13')-C(18') | 119.81(14) |
| C(18)-C(13)-P(1)  | 118.71(12) | C(18')-C(13')-P(1')  | 119.22(11) |
| C(13)-C(14)-H(14) | 120.0      | C(13')-C(14')-H(14') | 120.0      |
| C(15)-C(14)-C(13) | 119.93(15) | C(15')-C(14')-C(13') | 119.90(15) |
| C(15)-C(14)-H(14) | 120.0      | C(15')-C(14')-H(14') | 120.0      |

---



|                   |            |                      |            |
|-------------------|------------|----------------------|------------|
| C(14)-C(15)-H(15) | 119.9      | C(14')-C(15')-H(15') | 119.9      |
| C(14)-C(15)-C(16) | 120.20(16) | C(14')-C(15')-C(16') | 120.28(15) |
| C(16)-C(15)-H(15) | 119.9      | C(16')-C(15')-H(15') | 119.9      |
| C(15)-C(16)-H(16) | 119.9      | C(15')-C(16')-H(16') | 120.0      |
| C(17)-C(16)-C(15) | 120.10(15) | C(17')-C(16')-C(15') | 120.01(15) |
| C(17)-C(16)-H(16) | 119.9      | C(17')-C(16')-H(16') | 120.0      |
| C(16)-C(17)-H(17) | 119.9      | C(16')-C(17')-H(17') | 119.9      |
| C(16)-C(17)-C(18) | 120.28(16) | C(16')-C(17')-C(18') | 120.12(15) |
| C(18)-C(17)-H(17) | 119.9      | C(18')-C(17')-H(17') | 119.9      |
| C(13)-C(18)-H(18) | 120.2      | C(13')-C(18')-H(18') | 120.1      |
| C(17)-C(18)-C(13) | 119.70(15) | C(17')-C(18')-C(13') | 119.84(14) |
| C(17)-C(18)-H(18) | 120.2      | C(17')-C(18')-H(18') | 120.1      |
| C(20)-C(19)-P(2)  | 119.20(12) | C(20')-C(19')-P(2')  | 119.15(11) |
| C(20)-C(19)-C(24) | 120.40(14) | C(20')-C(19')-C(24') | 120.06(14) |
| C(24)-C(19)-P(2)  | 120.36(12) | C(24')-C(19')-P(2')  | 120.77(12) |
| C(19)-C(20)-H(20) | 120.2      | C(19')-C(20')-H(20') | 120.2      |
| C(21)-C(20)-C(19) | 119.55(15) | C(21')-C(20')-C(19') | 119.67(14) |
| C(21)-C(20)-H(20) | 120.2      | C(21')-C(20')-H(20') | 120.2      |
| C(20)-C(21)-H(21) | 120.0      | C(20')-C(21')-H(21') | 120.0      |
| C(22)-C(21)-C(20) | 119.97(16) | C(22')-C(21')-C(20') | 119.97(15) |
| C(22)-C(21)-H(21) | 120.0      | C(22')-C(21')-H(21') | 120.0      |
| C(21)-C(22)-H(22) | 119.8      | C(21')-C(22')-H(22') | 119.8      |
| C(23)-C(22)-C(21) | 120.39(15) | C(23')-C(22')-C(21') | 120.43(15) |
| C(23)-C(22)-H(22) | 119.8      | C(23')-C(22')-H(22') | 119.8      |
| C(22)-C(23)-H(23) | 119.9      | C(22')-C(23')-H(23') | 120.0      |
| C(22)-C(23)-C(24) | 120.26(16) | C(24')-C(23')-C(22') | 120.01(15) |
| C(24)-C(23)-H(23) | 119.9      | C(24')-C(23')-H(23') | 120.0      |
| C(19)-C(24)-H(24) | 120.3      | C(19')-C(24')-H(24') | 120.1      |
| C(23)-C(24)-C(19) | 119.40(16) | C(23')-C(24')-C(19') | 119.85(15) |
| C(23)-C(24)-H(24) | 120.3      | C(23')-C(24')-H(24') | 120.1      |
| C(26)-C(25)-P(2)  | 122.16(12) | C(26')-C(25')-P(2')  | 122.29(12) |
| C(26)-C(25)-C(30) | 119.81(14) | C(26')-C(25')-C(30') | 119.66(14) |
| C(30)-C(25)-P(2)  | 117.71(11) | C(30')-C(25')-P(2')  | 117.66(11) |
| C(25)-C(26)-H(26) | 120.2      | C(25')-C(26')-H(26') | 120.2      |
| C(27)-C(26)-C(25) | 119.64(15) | C(25')-C(26')-C(27') | 119.62(15) |

|                    |            |                      |            |
|--------------------|------------|----------------------|------------|
| C(27)-C(26)-H(26)  | 120.2      | C(27')-C(26')-H(26') | 120.2      |
| C(26)-C(27)-H(27)  | 119.8      | C(26')-C(27')-H(27') | 119.8      |
| C(28)-C(27)-C(26)  | 120.36(15) | C(28')-C(27')-C(26') | 120.42(16) |
| C(28)-C(27)-H(27)  | 119.8      | C(28')-C(27')-H(27') | 119.8      |
| C(27)-C(28)-H(28)  | 119.9      | C(27')-C(28')-H(28') | 119.9      |
| C(27)-C(28)-C(29)  | 120.11(15) | C(27')-C(28')-C(29') | 120.27(15) |
| C(29)-C(28)-H(28)  | 119.9      | C(29')-C(28')-H(28') | 119.9      |
| C(28)-C(29)-H(29)  | 120.0      | C(28')-C(29')-H(29') | 120.1      |
| C(30)-C(29)-C(28)  | 119.91(14) | C(28')-C(29')-C(30') | 119.83(15) |
| C(30)-C(29)-H(29)  | 120.0      | C(30')-C(29')-H(29') | 120.1      |
| C(25)-C(30)-H(30)  | 119.9      | C(25')-C(30')-H(30') | 119.9      |
| C(29)-C(30)-C(25)  | 120.12(14) | C(29')-C(30')-C(25') | 120.15(14) |
| C(29)-C(30)-H(30)  | 119.9      | C(29')-C(30')-H(30') | 119.9      |
| C(32)-C(31)-P(2)   | 118.78(12) | C(32')-C(31')-P(2')  | 118.95(12) |
| C(36)-C(31)-P(2)   | 121.51(12) | C(32')-C(31')-C(36') | 119.72(14) |
| C(36)-C(31)-C(32)  | 119.70(14) | C(36')-C(31')-P(2')  | 121.29(12) |
| C(31)-C(32)-H(32)  | 120.0      | C(31')-C(32')-H(32') | 120.0      |
| C(33)-C(32)-C(31)  | 120.00(15) | C(33')-C(32')-C(31') | 119.99(15) |
| C(33)-C(32)-H(32)  | 120.0      | C(33')-C(32')-H(32') | 120.0      |
| C(32)-C(33)-H(33)  | 120.0      | C(32')-C(33')-H(33') | 120.0      |
| C(34)-C(33)-C(32)  | 120.01(15) | C(34')-C(33')-C(32') | 120.08(15) |
| C(34)-C(33)-H(33)  | 120.0      | C(34')-C(33')-H(33') | 120.0      |
| C(33)-C(34)-H(34)  | 119.9      | C(33')-C(34')-H(34') | 119.9      |
| C(35)-C(34)-C(33)  | 120.22(15) | C(35')-C(34')-C(33') | 120.14(15) |
| C(35)-C(34)-H(34)  | 119.9      | C(35')-C(34')-H(34') | 119.9      |
| C(34)-C(35)-H(35)  | 119.9      | C(34')-C(35')-H(35') | 119.8      |
| C(34)-C(35)-C(36)  | 120.18(15) | C(34')-C(35')-C(36') | 120.36(15) |
| C(36)-C(35)-H(35)  | 119.9      | C(36')-C(35')-H(35') | 119.8      |
| C(31)-C(36)-H(36)  | 120.1      | C(31')-C(36')-H(36') | 120.1      |
| C(35)-C(36)-C(31)  | 119.88(15) | C(35')-C(36')-C(31') | 119.70(15) |
| C(35)-C(36)-H(36)  | 120.1      | C(35')-C(36')-H(36') | 120.1      |
| H(1)-F(2)-H(2A)    | 116(2)     | Cl(1')-C(37')-H(37C) | 109.3      |
| Cl(1)-C(37)-H(37A) | 109.3      | Cl(1')-C(37')-H(37D) | 109.3      |
| Cl(1)-C(37)-H(37B) | 109.3      | Cl(2')-C(37')-Cl(1') | 111.46(10) |
| Cl(2)-C(37)-Cl(1)  | 111.79(10) | Cl(2')-C(37')-H(37C) | 109.3      |

|                     |       |                      |        |
|---------------------|-------|----------------------|--------|
| Cl(2)-C(37)-H(37A)  | 109.3 | Cl(2')-C(37')-H(37D) | 109.3  |
| Cl(2)-C(37)-H(37B)  | 109.3 | H(37C)-C(37')-H(37D) | 108.0  |
| H(37A)-C(37)-H(37B) | 107.9 | H(1')-F(2')-H(2'A)   | 108(2) |

**Table 4. Anisotropic displacement parameters ( $\text{\AA}^2 \times 10^3$ ).**

The anisotropic displacement factor exponent takes the form:  $-2\pi^2 [ h^2 a^{*2} U^{11} + \dots + 2 h k a^* b^* U^{12} ]$

|       | $U^{11}$ | $U^{22}$ | $U^{33}$ | $U^{23}$ | $U^{13}$ | $U^{12}$ |
|-------|----------|----------|----------|----------|----------|----------|
| P(1)  | 11(1)    | 11(1)    | 11(1)    | -1(1)    | -1(1)    | 0(1)     |
| P(2)  | 12(1)    | 10(1)    | 12(1)    | 0(1)     | 0(1)     | 0(1)     |
| N(1)  | 14(1)    | 16(1)    | 13(1)    | -1(1)    | -1(1)    | -2(1)    |
| C(1)  | 11(1)    | 11(1)    | 18(1)    | 1(1)     | -2(1)    | 1(1)     |
| C(2)  | 15(1)    | 16(1)    | 19(1)    | 0(1)     | 0(1)     | 2(1)     |
| C(3)  | 14(1)    | 21(1)    | 26(1)    | 7(1)     | 2(1)     | 1(1)     |
| C(4)  | 14(1)    | 19(1)    | 37(1)    | 7(1)     | -6(1)    | -4(1)    |
| C(5)  | 21(1)    | 18(1)    | 28(1)    | 0(1)     | -10(1)   | -4(1)    |
| C(6)  | 18(1)    | 16(1)    | 18(1)    | 1(1)     | -3(1)    | 1(1)     |
| C(7)  | 13(1)    | 18(1)    | 10(1)    | -1(1)    | 1(1)     | 1(1)     |
| C(8)  | 16(1)    | 18(1)    | 17(1)    | -2(1)    | -2(1)    | 0(1)     |
| C(9)  | 16(1)    | 30(1)    | 19(1)    | -6(1)    | -4(1)    | 1(1)     |
| C(10) | 16(1)    | 35(1)    | 15(1)    | 2(1)     | -1(1)    | 7(1)     |
| C(11) | 21(1)    | 21(1)    | 21(1)    | 6(1)     | 1(1)     | 3(1)     |
| C(12) | 18(1)    | 18(1)    | 17(1)    | 1(1)     | -1(1)    | -1(1)    |
| C(13) | 10(1)    | 13(1)    | 19(1)    | -2(1)    | -1(1)    | -1(1)    |
| C(14) | 16(1)    | 20(1)    | 19(1)    | -4(1)    | -1(1)    | 0(1)     |
| C(15) | 17(1)    | 24(1)    | 28(1)    | -11(1)   | 1(1)     | -1(1)    |
| C(16) | 13(1)    | 14(1)    | 43(1)    | -7(1)    | 0(1)     | 0(1)     |
| C(17) | 18(1)    | 17(1)    | 35(1)    | 5(1)     | -3(1)    | 1(1)     |
| C(18) | 16(1)    | 18(1)    | 21(1)    | 2(1)     | -2(1)    | 0(1)     |
| C(19) | 20(1)    | 10(1)    | 12(1)    | -1(1)    | -1(1)    | 0(1)     |
| C(20) | 22(1)    | 13(1)    | 15(1)    | -2(1)    | -2(1)    | 0(1)     |
| C(21) | 32(1)    | 14(1)    | 18(1)    | -2(1)    | -10(1)   | 1(1)     |
| C(22) | 43(1)    | 14(1)    | 15(1)    | 2(1)     | -6(1)    | 1(1)     |
| C(23) | 34(1)    | 14(1)    | 20(1)    | 2(1)     | 4(1)     | -4(1)    |
| C(24) | 22(1)    | 13(1)    | 19(1)    | 0(1)     | 0(1)     | -1(1)    |
| C(25) | 13(1)    | 13(1)    | 14(1)    | 0(1)     | -1(1)    | -2(1)    |

---

|        |       |        |       |        |        |        |
|--------|-------|--------|-------|--------|--------|--------|
| C(26)  | 16(1) | 16(1)  | 29(1) | -2(1)  | -4(1)  | 2(1)   |
| C(27)  | 16(1) | 22(1)  | 37(1) | 0(1)   | -12(1) | 1(1)   |
| C(28)  | 21(1) | 21(1)  | 24(1) | -1(1)  | -8(1)  | -6(1)  |
| C(29)  | 20(1) | 12(1)  | 20(1) | -2(1)  | -2(1)  | -2(1)  |
| C(30)  | 14(1) | 14(1)  | 17(1) | 2(1)   | -2(1)  | 0(1)   |
| C(31)  | 13(1) | 12(1)  | 16(1) | -3(1)  | -2(1)  | -1(1)  |
| C(32)  | 17(1) | 16(1)  | 19(1) | 0(1)   | 0(1)   | -2(1)  |
| C(33)  | 21(1) | 13(1)  | 29(1) | 1(1)   | -5(1)  | -1(1)  |
| C(34)  | 16(1) | 14(1)  | 31(1) | -8(1)  | -8(1)  | 3(1)   |
| C(35)  | 16(1) | 24(1)  | 22(1) | -6(1)  | 0(1)   | 3(1)   |
| C(36)  | 18(1) | 17(1)  | 19(1) | -1(1)  | 0(1)   | 1(1)   |
| F(1)   | 48(1) | 93(1)  | 31(1) | -19(1) | 7(1)   | -34(1) |
| F(2)   | 71(1) | 47(1)  | 36(1) | 4(1)   | -13(1) | -28(1) |
| F(3)   | 48(1) | 200(2) | 49(1) | 53(1)  | -11(1) | -32(1) |
| Cl(1)  | 28(1) | 28(1)  | 34(1) | 0(1)   | 2(1)   | -3(1)  |
| Cl(2)  | 45(1) | 38(1)  | 26(1) | -8(1)  | -2(1)  | 2(1)   |
| C(37)  | 40(1) | 22(1)  | 38(1) | -3(1)  | -2(1)  | 2(1)   |
| P(1')  | 11(1) | 11(1)  | 11(1) | 0(1)   | -1(1)  | 0(1)   |
| P(2')  | 11(1) | 10(1)  | 12(1) | -1(1)  | -1(1)  | -1(1)  |
| N(1')  | 14(1) | 16(1)  | 13(1) | -1(1)  | -1(1)  | -2(1)  |
| C(1')  | 12(1) | 12(1)  | 18(1) | 1(1)   | -2(1)  | 1(1)   |
| C(2')  | 17(1) | 16(1)  | 21(1) | 1(1)   | 2(1)   | 0(1)   |
| C(3')  | 14(1) | 20(1)  | 33(1) | 8(1)   | 4(1)   | 1(1)   |
| C(4')  | 14(1) | 19(1)  | 45(1) | 9(1)   | -10(1) | -4(1)  |
| C(5')  | 25(1) | 20(1)  | 28(1) | 3(1)   | -14(1) | -4(1)  |
| C(6')  | 18(1) | 16(1)  | 19(1) | 2(1)   | -5(1)  | -2(1)  |
| C(7')  | 13(1) | 16(1)  | 11(1) | 0(1)   | 0(1)   | 1(1)   |
| C(8')  | 18(1) | 16(1)  | 19(1) | -2(1)  | -4(1)  | 0(1)   |
| C(9')  | 21(1) | 27(1)  | 19(1) | -3(1)  | -6(1)  | 0(1)   |
| C(10') | 17(1) | 30(1)  | 15(1) | 2(1)   | -2(1)  | 6(1)   |
| C(11') | 23(1) | 18(1)  | 20(1) | 5(1)   | 0(1)   | 3(1)   |
| C(12') | 19(1) | 16(1)  | 16(1) | 0(1)   | -2(1)  | -1(1)  |
| C(13') | 12(1) | 12(1)  | 17(1) | -2(1)  | -1(1)  | 0(1)   |
| C(14') | 21(1) | 18(1)  | 16(1) | 0(1)   | -3(1)  | 2(1)   |
| C(15') | 26(1) | 22(1)  | 18(1) | -5(1)  | -1(1)  | 5(1)   |

---

|        |        |       |       |        |        |        |
|--------|--------|-------|-------|--------|--------|--------|
| C(16') | 18(1)  | 15(1) | 30(1) | -4(1)  | -2(1)  | 3(1)   |
| C(17') | 18(1)  | 16(1) | 25(1) | 5(1)   | -2(1)  | 1(1)   |
| C(18') | 16(1)  | 18(1) | 16(1) | 2(1)   | 0(1)   | -1(1)  |
| C(19') | 17(1)  | 11(1) | 12(1) | -2(1)  | 0(1)   | 1(1)   |
| C(20') | 18(1)  | 13(1) | 14(1) | -2(1)  | 0(1)   | -2(1)  |
| C(21') | 22(1)  | 17(1) | 19(1) | -2(1)  | -6(1)  | 0(1)   |
| C(22') | 32(1)  | 15(1) | 14(1) | 1(1)   | -3(1)  | 0(1)   |
| C(23') | 26(1)  | 14(1) | 20(1) | 2(1)   | 3(1)   | -4(1)  |
| C(24') | 17(1)  | 14(1) | 21(1) | -1(1)  | 2(1)   | -1(1)  |
| C(25') | 13(1)  | 14(1) | 15(1) | -1(1)  | -1(1)  | -2(1)  |
| C(26') | 18(1)  | 15(1) | 35(1) | -6(1)  | -9(1)  | 3(1)   |
| C(27') | 21(1)  | 24(1) | 43(1) | -5(1)  | -18(1) | 3(1)   |
| C(28') | 24(1)  | 21(1) | 27(1) | -4(1)  | -10(1) | -5(1)  |
| C(29') | 20(1)  | 13(1) | 22(1) | -3(1)  | -2(1)  | -1(1)  |
| C(30') | 14(1)  | 15(1) | 18(1) | 1(1)   | -3(1)  | -1(1)  |
| C(31') | 12(1)  | 13(1) | 16(1) | -3(1)  | -4(1)  | 0(1)   |
| C(32') | 17(1)  | 16(1) | 20(1) | -1(1)  | -3(1)  | -1(1)  |
| C(33') | 21(1)  | 14(1) | 31(1) | -1(1)  | -6(1)  | 0(1)   |
| C(34') | 17(1)  | 18(1) | 30(1) | -10(1) | -10(1) | 5(1)   |
| C(35') | 14(1)  | 28(1) | 20(1) | -7(1)  | -2(1)  | 4(1)   |
| C(36') | 16(1)  | 19(1) | 19(1) | -2(1)  | -2(1)  | 1(1)   |
| Cl(1') | 28(1)  | 29(1) | 26(1) | -2(1)  | -5(1)  | -6(1)  |
| Cl(2') | 28(1)  | 40(1) | 22(1) | -4(1)  | -7(1)  | 2(1)   |
| C(37') | 28(1)  | 24(1) | 28(1) | -6(1)  | -8(1)  | 3(1)   |
| F(1')  | 34(1)  | 52(1) | 48(1) | -7(1)  | -6(1)  | 4(1)   |
| F(2')  | 100(1) | 70(1) | 38(1) | -7(1)  | -12(1) | 45(1)  |
| F(3')  | 38(1)  | 64(1) | 45(1) | 4(1)   | -5(1)  | -14(1) |

**Table 5. Hydrogen coordinates ( $\times 10^4$ ) and isotropic displacement parameters ( $\text{\AA}^2 \times 10^3$ ).**

|      | x    | y    | z    | U(eq) |
|------|------|------|------|-------|
| H(2) | 5932 | 2151 | 9286 | 20    |
| H(3) | 3982 | 1356 | 9342 | 25    |
| H(4) | 3391 | 758  | 8419 | 27    |
| H(5) | 4740 | 946  | 7434 | 26    |
| H(6) | 6713 | 1732 | 7366 | 20    |

---

|        |          |          |          |         |
|--------|----------|----------|----------|---------|
| H(8)   | 10044    | 3300     | 9018     | 21      |
| H(9)   | 11609    | 2769     | 9719     | 26      |
| H(10)  | 11573    | 1429     | 10009    | 27      |
| H(11)  | 10048    | 605      | 9573     | 26      |
| H(12)  | 8497     | 1120     | 8864     | 21      |
| H(14)  | 7156     | 3503     | 9457     | 22      |
| H(15)  | 6178     | 4790     | 9701     | 28      |
| H(16)  | 5708     | 5672     | 8878     | 28      |
| H(17)  | 6197     | 5270     | 7810     | 28      |
| H(18)  | 7200     | 3989     | 7556     | 22      |
| H(20)  | 7891     | 3071     | 6492     | 20      |
| H(21)  | 7530     | 3733     | 5532     | 25      |
| H(22)  | 9426     | 4326     | 4936     | 29      |
| H(23)  | 11657    | 4308     | 5310     | 28      |
| H(24)  | 12019    | 3684     | 6282     | 22      |
| H(26)  | 12986    | 2524     | 7725     | 24      |
| H(27)  | 14127    | 3273     | 8425     | 29      |
| H(28)  | 13167    | 4533     | 8756     | 26      |
| H(29)  | 11118    | 5081     | 8350     | 21      |
| H(30)  | 9959     | 4336     | 7659     | 18      |
| H(32)  | 10482    | 1212     | 7730     | 21      |
| H(33)  | 11765    | 11       | 7439     | 25      |
| H(34)  | 13322    | -76      | 6489     | 24      |
| H(35)  | 13598    | 1034     | 5826     | 25      |
| H(36)  | 12340    | 2242     | 6116     | 22      |
| H(1)   | 4560(40) | 2810(20) | 5331(18) | 116(13) |
| H(2A)  | 5220(40) | 3060(20) | 6262(18) | 95(11)  |
| H(37A) | 7639     | 1724     | 5302     | 40      |
| H(37B) | 6334     | 1699     | 5860     | 40      |
| H(2')  | 5721     | 1940     | 4214     | 22      |
| H(3')  | 3755     | 1167     | 4201     | 27      |
| H(4')  | 3280     | 603      | 3242     | 30      |
| H(5')  | 4744     | 819      | 2292     | 28      |
| H(6')  | 6710     | 1599     | 2295     | 21      |
| H(8')  | 9772     | 3112     | 4096     | 21      |

---

---

|        |          |          |         |         |
|--------|----------|----------|---------|---------|
| H(9')  | 11316    | 2562     | 4796    | 26      |
| H(10') | 11440    | 1193     | 4986    | 25      |
| H(11') | 10066    | 364      | 4460    | 25      |
| H(12') | 8504     | 906      | 3763    | 20      |
| H(14') | 6869     | 3209     | 4476    | 22      |
| H(15') | 5817     | 4464     | 4778    | 27      |
| H(16') | 5515     | 5442     | 4002    | 25      |
| H(17') | 6165     | 5147     | 2917    | 24      |
| H(18') | 7185     | 3885     | 2607    | 20      |
| H(20') | 7744     | 2957     | 1532    | 18      |
| H(21') | 7263     | 3680     | 617     | 23      |
| H(22') | 9071     | 4357     | 31      | 25      |
| H(23') | 11341    | 4344     | 368     | 25      |
| H(24') | 11815    | 3658     | 1299    | 21      |
| H(26') | 12868    | 2431     | 2759    | 27      |
| H(27') | 13945    | 3170     | 3489    | 34      |
| H(28') | 12936    | 4412     | 3836    | 28      |
| H(29') | 10892    | 4954     | 3427    | 22      |
| H(30') | 9802     | 4225     | 2699    | 18      |
| H(32') | 10296    | 1052     | 2613    | 21      |
| H(33') | 11572    | -127     | 2250    | 26      |
| H(34') | 13250    | -115     | 1341    | 26      |
| H(35') | 13705    | 1075     | 809     | 25      |
| H(36') | 12462    | 2264     | 1172    | 22      |
| H(37C) | 7539     | 1660     | 391     | 31      |
| H(37D) | 6357     | 1478     | 975     | 31      |
| H(1')  | 4270(50) | 3160(30) | 170(20) | 135(15) |
| H(2'A) | 5120(30) | 2753(19) | 982(17) | 87(10)  |

---

**Table 6. Hydrogen bonds [ $\text{\AA}$  and  $^\circ$ ].**

| D-H...A              | d(D-H)  | d(H...A) | d(D...A)   | $\angle$ (DHA) |
|----------------------|---------|----------|------------|----------------|
| F(2)-H(1)...F(1)     | 1.15(4) | 1.15(4)  | 2.3018(17) | 174(4)         |
| F(3)-H(2A)...F(2)    | 0.90(4) | 1.40(4)  | 2.301(2)   | 175(4)         |
| F(1')-H(1')...F(2')  | 1.08(5) | 1.26(5)  | 2.3252(19) | 167(4)         |
| F(3')-H(2'A)...F(2') | 1.02(4) | 1.28(4)  | 2.3025(19) | 176(3)         |



## 4, References.

1. Dong J. J., Sharpless K. B., Kwisnek L., Oakdale J. S. & Fokin V. V. SuFEx-based synthesis of polysulfates. *Angew. Chem. Int. Edit.* **53**, 9466-9470 (2014)
2. Herkelmann R. & Sartori P. Synthesis of perfluoropropane-1.3-disulfonic acid and perfluorobutane-1.4-disulfonic acid. *J. Fluorine Chem.* **44**, 299-307 (1989).
3. Jüschke R., Velayutham D. & Sartori P. A comparative study of the electrochemical fluorination (ECF) of 1 ,n-alkanebis (sulfonylfluorides) (n = 1–3). *J. Fluorine Chem.* **83**, 145-149 (1997).
4. Qiu W. & Burton D. J. A useful synthesis of  $\omega$ -iodoperfluoroalkanesulfonyl fluorides and perfluoroalkane- $\alpha,\omega$ -bis-sulfonyl fluorides. *J. Fluorine Chem.* **60**, 93-100 (1993).
5. Farnham, W. B., Middleton, W. J. & Sogah, D. Y. Tris(dialkylamino)sulfonium bifluoride catalysts. U.S. patent 4598161 A (1986).
6. Landini D., Molinari H., Penso M. & Rampoldi A. Convenient procedures for the preparation of lipophilic quaternary onium fluorides, hydrogendifluorides and dihydrogentrifluorides via ion-exchange in 2-phase systems. *Synthesis* 953-955 (1988).
7. Muttenthaler M., Albericio F. & Dawson P. E. Methods, setup and safe handling for anhydrous hydrogen fluoride cleavage in Boc solid-phase peptide synthesis. *Nat. Protoc.* **10**, 1067-1083 (2015).
8. Farnham W. B., Dixon D. A., Middleton W. J., Calabrese J. C., Harlow R. L., Whitney J. F., *et al.* The crystal and molecular structure of tris(substituted amino) sulfonium ions. *J. Am. Chem. Soc.* **109**, 476-483 (1987).
9. Martinsen A. & Songstad J. Preparation and properties of some bis(Triphenylphosphine)-iminium salts, [(Ph<sub>3</sub>P)<sub>2</sub>N]X. *Acta. Chem. Scand. A.* **31**, 645-650 (1977).
10. Carpino L. A., Ionescu D., El-Faham A., Beyermann M., Henklein P., Hanay C., *et al.* Complex polyfluoride additives in Fmoc-amino acid fluoride coupling processes. enhanced reactivity and avoidance of stereomutation. *Org. Lett.* **5**, 975-977 (2003).
